# Supplementary material for: C–N and C–P bond formation via cross dehydrative coupling reaction: an efficient synthesis of novel 3,4-dihydroquinazolines
Source: Royal Society of Chemistry journal article supplement (doi:10.1039/c4ra10203g), 2014-10-13
Supplement: c4ra10203g1.pdf [file c4ra10203g1.pdf]

## Supporting Information

### **C-N and C-P bond formation *via* cross dehydrative coupling reaction: an efficient synthesis of novel 3,4-dihydroquinazolines**

**G. Saidulu,<sup>a</sup> R. Arun Kumar,<sup>a</sup> T. Anitha,<sup>a</sup> A. Srinivasulu,<sup>a</sup> B. Sridhar,<sup>b</sup> Shih Tzung Liu,<sup>c</sup> K. Rajender Reddy<sup>a</sup>**

<sup>a</sup>*Inorganic and Physical Chemistry Division, CSIR-Indian Institute of Chemical Technology, Tarnaka, Hyderabad – 500 007, Telangana State, India, Fax: +91-040-27160921; e-mail: rajender@iict.res.in; rajenderkallu@yahoo.com*

<sup>b</sup>*Laboratory of X-ray Crystallography, CSIR-Indian Institute of Chemical Technology, Tarnaka, Hyderabad – 500 007, Telangana State, India*

<sup>c</sup>*Department of Chemistry, National Taiwan University, Taipei-106, Taiwan. e-mail:stliu@ntu.edu.tw*

### *Table of Contents*

|                                                                                                                |             |
|----------------------------------------------------------------------------------------------------------------|-------------|
| <b>1. General Information.....</b>                                                                             | <b>S1</b>   |
| <b>2. Experimental section.....</b>                                                                            | <b>S1</b>   |
| <b>3. Spectroscopic data for products .....</b>                                                                | <b>S3</b>   |
| <b>4. Copies of <sup>1</sup>H, <sup>13</sup>C &amp; <sup>31</sup>P NMR and HRMS spectra for products .....</b> | <b>S19</b>  |
| <b>5. X-RAY Studies.....</b>                                                                                   | <b>S97</b>  |
| <b>7. References.....</b>                                                                                      | <b>S100</b> |

## 1. General Information

All the other chemicals and solvents were obtained from commercial sources, and purified by using standard methods. Silica gel (100–200 mesh) was used for column chromatography and thin-layer chromatography was performed on pre-coated silica gel 60-F<sub>254</sub> plates and visualized by UV-light and developed by iodine. The IR values are reported in reciprocal centimeters (cm<sup>-1</sup>). All <sup>1</sup>H, <sup>13</sup>C {<sup>1</sup>H}, <sup>31</sup>P NMR spectras were recorded on a 300, 400, and 500 MHz spectrometer. Chemical shifts ( $\delta$ ) are reported in ppm, using TMS ( $\delta = 0$ ) as an internal standard in CDCl<sub>3</sub>. The peak patterns are indicated as follows: bs, broad singlet; s, singlet; d, doublet; t, triplet; dd, doublet of doublet; sep, septet; m, multiplet. The coupling constants ( $J$ ) are reported in Hertz (Hz). Mass spectral data was compiled using MS (ESI), HRMS mass spectrometers and the orbitrap mass analyzer was used for the HRMS measurement. *N*-(2-aminobenzyl)anilines (**2**) were prepared by the literature method.<sup>(3)</sup>

## 2. Experimental section

### (i) General procedure for the preparation of 3,4-diaryl-dihydroquinazolin-4-ol using KI/TBHP:

To a solution of *N*-(2-aminobenzyl) substituted anilines **1** (1,3-diamine) (3 mmol) in 6 mL of ethanol, aldehyde **2** (3 mmol) was added and stirred at room temperature for 3 hours. To the same solution, KI (20 mol%) and 1.5 mL of 70 wt% TBHP in H<sub>2</sub>O (4 equivalent) was added drop wise for 5 minutes and stirred at room temperature for overnight. The solvent (EtOH) was removed under reduced pressure. The residue was diluted with 6 mL of dimethoxy ethane (DME). The mixture was stirred at 100 °C for 5-6 hours. The progress of the reaction was monitored by TLC. After completion of reaction, the reaction mixture allowed to cool RT, the solvent (DME) was removed under vacuum. The crude product was purified by column chromatography using petroleum ether/ethyl acetate mixture as an eluent and was analyzed by <sup>1</sup>H NMR, <sup>13</sup>C NMR, IR, ESI-MS and ESI-HRMS (Table S1).

**(ii) General procedure for synthesis of N-(2,3-diaryl-3,4-dihydroquinazolin-4-yl)amide derivatives *via* cross dehydrative coupling reaction.**

To a solution of 3,4-diaryl-dihydroquinazolin-4-ol (**3**) (0.25 mmol) and amide (**4**) (0.5 mmol, 2 equiv.) in 2 mL of DCE, FeCl<sub>2</sub> (10 mol%) was added and the mixture was stirred magnetically at 75 °C for 2 hours. The progress of the reaction was monitored by TLC. After completion of reaction, the reaction mixture was allowed to cool to RT and filter through celite using chloroform/ethylacetate. The solution was concentrated under vacuum and afforded the crude product. The crude product was purified by SiO<sub>2</sub> column chromatography using petroleum ether/ethyl acetate mixture as an eluent and was analyzed by <sup>1</sup>H NMR, <sup>13</sup>C NMR, ESI-MS, ESI-HRMS.

**(iii) General procedure for synthesis of dimethyl 2,3-diaryl-3,4-dihydroquinazolin-4-ylphosphonate derivatives *via* cross dehydrative coupling reaction.**

To a solution of 3,4-diaryl-dihydroquinazolin-4-ol (**3**) (0.25 mmol) in 2 mL of DCE dialkyl or diaryl phosphite (**6**) (0.5 mmol, 2 equiv.) was added and the mixture was stirred magnetically at 75 °C for 2 hours. The progress of the reaction was monitored by TLC. After completion of reaction, the reaction mixture was allowed to cool to RT and filter through celite using chloroform/ethylacetate. The solution was concentrated under vacuum and afforded the crude product. The crude product was purified by column chromatography using petroleum ether/ethyl acetate mixture as eluent and was analyzed by <sup>1</sup>H NMR, <sup>13</sup>C NMR, <sup>31</sup>P NMR, ESI-MS, ESI-HRMS.

### 3. Spectroscopic data for products

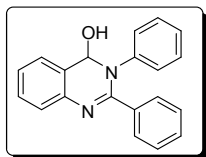

#### 2,3-diphenyl-3,4-dihydroquinazolin-4-ol: (3a)

White solid. Isolated yield: 78% (Petroleum ether/Ethyl acetate = 1;1, Rf = 0.5). IR  $\nu_{\max}$   $\text{cm}^{-1}$ : 3061, 2930, 1588, 1547, 1487, 1405, 1250, 1029, 763.  $^1\text{H}$  NMR ( $\text{CDCl}_3$ , 300 MHz, ppm):  $\delta$  7.29-6.88 (m, 14 H), 5.89 (s, 1H).  $^{13}\text{C}$  NMR (75 MHz,  $\text{CDCl}_3$ , ppm):  $\delta$  144.9, 140.2, 134.1, 130.5, 129.3, 129.1, 128.5, 127.4, 126.0, 125.5, 125.1, 124.9, 124.2, 123.7. MS (ESI)  $m/z = 301$  ( $\text{M} + \text{H}$ ) $^+$ ; (ESI-HRMS) calculated for  $\text{C}_{20}\text{H}_{17}\text{ON}_2$  ( $\text{M} + \text{H}$ ) $^+$ : 301.13354, found: 301.13411.

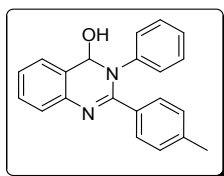

#### 3-phenyl-2-p-tolyl-3,4-dihydroquinazolin-4-ol (3b).

White solid. Isolated yield: 84%. mp 188-190 °C. (Petroleum ether/ethyl acetate = 2:1, Rf = 0.5). IR  $\nu_{\max}$  ( $\text{cm}^{-1}$ ): 3302, 2884, 1586, 1548, 1483, 1321, 1250, 1054, 994, 823, 629, 560, 466.  $^1\text{H}$  NMR (500 MHz,  $\text{CDCl}_3$ )  $\delta$  7.22 (d,  $J = 7.7$  Hz, 1H), 7.16-7.09 (m, 7H), 7.03 (t,  $J = 7.1$  Hz, 2H), 6.96 (d,  $J = 7.0$  Hz, 1H), 6.88 (d,  $J = 7.7$  Hz, 2H), 5.95 (s, 1H), 2.26 (s, 3H).  $^{13}\text{C}$  NMR (75 MHz,  $\text{CDCl}_3$ )  $\delta$  153.2, 145.1, 140.4, 139.3, 131.4, 130.4, 129.1, 128.4, 128.1, 126.0, 125.1, 125.0, 124.9, 124.1, 123.8, 82.5, 21.3. MS (ESI)  $m/z = 315$  ( $\text{M} + \text{H}$ ) $^+$ ; (ESI-HRMS) calculated for  $\text{C}_{21}\text{H}_{19}\text{ON}_2$  ( $\text{M} + \text{H}$ ) $^+$  = 315.14919, found 329.14995.

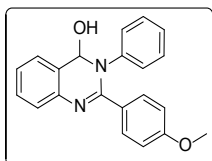

#### 2-(4-methoxyphenyl)-3-phenyl-3,4-dihydroquinazolin-4-ol (3c).

White solid. Isolated yield: 58%. mp. 170-172 °C. (Petroleum ether/ethyl acetate = 2:1, Rf = 0.4). IR  $\nu_{\max}$  ( $\text{cm}^{-1}$ ): 3073, 2889, 1586, 1546, 1483, 1291, 1250, 1035, 994, 837, 698, 523.  $^1\text{H}$  NMR (500 MHz,  $\text{CDCl}_3$ )  $\delta$  7.19-7.18 (m, 3H), 7.14-7.10 (m, 5H), 7.03 (t,  $J = 7.0$  Hz, 2H), 6.93-6.92 (m, 1H), 6.58 (d,  $J = 8.5$  Hz, 2H), 5.93 (s, 1H), 3.76 (s, 3H).  $^{13}\text{C}$  NMR (125 MHz,  $\text{CDCl}_3$ )  $\delta$  160.3, 152.9, 145.3, 140.4, 132.1, 128.9, 128.5, 126.4, 126.0, 125.0, 124.8, 124.3, 123.5, 112.7, 82.6, 55.1. MS (ESI)  $m/z = 331$  ( $\text{M} + \text{H}$ ) $^+$ ; (ESI-HRMS) calculated for  $\text{C}_{21}\text{H}_{19}\text{O}_2\text{N}_2$  ( $\text{M} + \text{H}$ ) $^+$  = 331.14410, found 331.14499.

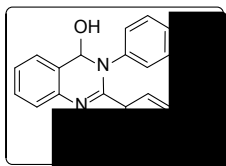

**3-phenyl-2-(4-(trifluoromethyl)phenyl)-3,4-dihydroquinazolin-4-ol (3d).**

White solid. Isolated yield: 67%. mp 188-190 °C. (Petroleum ether/ethyl acetate = 2:1, Rf = 0.5). IR  $\nu_{\max}$  (cm<sup>-1</sup>): 3143, 2961, 2880, 1586, 1546, 1480, 1358, 1252, 1055, 970, 842, 698, 550, 520. <sup>1</sup>H NMR (300 MHz, CDCl<sub>3</sub>)  $\delta$  7.38-7.29 (m, 6H), 7.24-7.14 (m, 3H), 7.11-7.06 (m, 2H), 6.95-6.90 (m, 2H), 5.96 (s, 1H). <sup>13</sup>C NMR (125 MHz, CDCl<sub>3</sub>)  $\delta$  151.7, 144.3, 139.9, 137.5, 130.5, 129.3, 128.9, 126.2, 125.7, 124.7, 124.4, 124.0, 82.4. MS (ESI) m/z = 369 (M + H)<sup>+</sup>; (ESI-HRMS) calculated for C<sub>21</sub>H<sub>16</sub>ON<sub>2</sub>F<sub>3</sub> (M+H)<sup>+</sup> = 369.12092, found 369.12226.

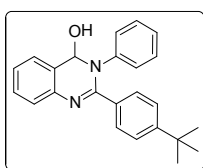

**2-(4-tert-butylphenyl)-3-phenyl-3,4-dihydroquinazolin-4-ol (3e).**

White solid. Isolated yield: 81%. mp 194-196 °C. (Petroleum ether/ethyl acetate = 2:1, Rf = 0.5). IR  $\nu_{\max}$  (cm<sup>-1</sup>): 3464, 2964, 2872, 1579, 1544, 1482, 1361, 1251, 1054, 1014, 841, 697, 565, 468. <sup>1</sup>H NMR (300 MHz, CDCl<sub>3</sub>)  $\delta$  7.23-7.05 (m, 11H), 6.99 (d, *J* = 7.3 Hz, 1H), 6.90 (t, *J* = 6.9 Hz, 1H), 5.93 (s, 1H), 1.26 (s, 9H). <sup>13</sup>C NMR (125 MHz, CDCl<sub>3</sub>)  $\delta$  153.1, 152.3, 145.2, 140.3, 130.8, 130.4, 128.9, 128.4, 125.8, 125.2, 125.0, 124.9, 124.2, 123.5, 82.7, 34.5, 31.1. MS (ESI) m/z = 357 (M + H)<sup>+</sup>; (ESI-HRMS) calculated for C<sub>24</sub>H<sub>25</sub>ON<sub>2</sub> (M+H)<sup>+</sup> = 357.19614, found 357.19713.

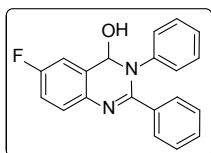

**6-fluoro-2,3-diphenyl-3,4-dihydroquinazolin-4-ol (3f).**

White solid. Isolated yield: 80%. mp 202-204 °C, (Petroleum ether/ethyl acetate = 2:1, Rf = 0.5). IR  $\nu_{\max}$  (cm<sup>-1</sup>): 2946, 2828, 1590, 1550, 1489, 1398, 1243, 1038, 943, 831, 698, 555, 504. <sup>1</sup>H NMR (500 MHz, CDCl<sub>3</sub>)  $\delta$  7.23-7.17 (m, 4H), 7.13-7.02 (m, 7H), 6.83 (t, *J* = 8.6 Hz, 1H), 6.57 (d, *J* = 8.2 Hz, 1H), 5.85 (s, 1H). <sup>13</sup>C NMR (125 MHz, CDCl<sub>3</sub>)  $\delta$  161.1, 159.2, 152.8, 144.8, 136.5, 133.2, 130.5, 129.5, 128.6, 127.3, 125.5, 125.2, 125.0, 124.7, 116.5, 116.3, 112.1, 112.0, 82.2. MS (ESI) m/z = 319 (M + H)<sup>+</sup>; (ESI-HRMS) calculated for C<sub>20</sub>H<sub>16</sub>ON<sub>2</sub>F (M+H)<sup>+</sup> = 319.12412, found 319.12489.

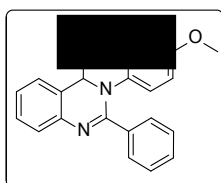

### 3-(4-methoxyphenyl)-2-phenyl-3,4-dihydroquinazolin-4-ol (3g).

White solid. Isolated yield: 63%. mp 208-210 °C. (Petroleum ether/ethyl acetate = 2:1, R<sub>f</sub> = 0.4). IR  $\nu_{\max}$  (cm<sup>-1</sup>): 3061, 2891, 1587, 1551, 1508, 1357, 1290, 1054, 998, 834, 661, 576, 497. <sup>1</sup>H NMR (500 MHz, CDCl<sub>3</sub>)  $\delta$  7.29-7.25 (m, 4H), 7.20 (t, *J* = 8.0 Hz, 2H), 7.12-7.07 (m, 3H), 7.00 (t, *J* = 8.2 Hz, 2H), 6.65 (d, *J* = 8.6 Hz, 2H), 5.93 (s, 1H), 3.71 (s, 3H). <sup>13</sup>C NMR (125 MHz, CDCl<sub>3</sub>)  $\delta$  157.1, 153.2, 140.5, 138.2, 134.5, 130.4, 129.1, 127.4, 126.3, 126.1, 125.3, 124.0, 123.9, 113.7, 82.7, 55.3. MS (ESI) *m/z* = 331 (M + H)<sup>+</sup>; (ESI-HRMS) calculated for C<sub>21</sub>H<sub>19</sub>O<sub>2</sub>N<sub>2</sub> (M+H)<sup>+</sup> = 331.14410, found 331.14475.

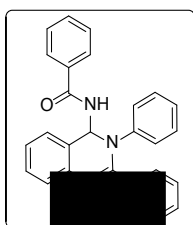

### N-(2,3-diphenyl-3,4-dihydroquinazolin-4-yl)benzamide (5a).

White solid. Isolated yield: 93%. mp 185-187 °C. (Petroleum ether/ethyl acetate = 2:1, R<sub>f</sub> = 0.6). IR  $\nu_{\max}$  (cm<sup>-1</sup>): 3107, 3033, 2927, 1654, 1547, 1486, 1336, 1244, 1040, 765, 696, 560, 517. <sup>1</sup>H NMR (300 MHz, DMSO-d<sub>6</sub>)  $\delta$  9.78 (bs, 1H), 8.20-8.07 (m, 1H), 7.92 (d, *J* = 8.3, 2H), 7.60 (d, *J* = 7.7 Hz, 2H), 7.48-7.46 (m, 1H), 7.42-7.37 (m, 3H), 7.32 (d, *J* = 7.5 Hz, 1H), 7.24-7.12 (m, 8H), 7.06 (d, *J* = 8.4 Hz, 1H), 7.01-6.97 (m, 1H). <sup>13</sup>C NMR (75 MHz, DMSO-d<sub>6</sub>)  $\delta$  165.0, 153.4, 144.6, 141.2, 136.4, 133.6, 131.6, 129.3, 128.8, 128.1, 127.7, 125.9, 125.7, 124.8, 124.5, 123.7, 79.0, 64.2. MS (ESI) *m/z* = 404 (M + H)<sup>+</sup>; (ESI-HRMS) calculated for C<sub>27</sub>H<sub>22</sub>ON<sub>3</sub> (M+H)<sup>+</sup> = 404.1757, found 404.1755.

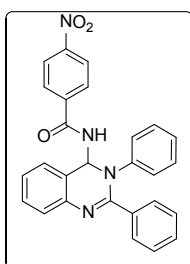

### N-(2,3-diphenyl-3,4-dihydroquinazolin-4-yl)-4-nitrobenzamide (5b).

Yellow solid. Isolated yield: 89%. mp 216-218 °C. (Petroleum ether/ethyl acetate = 2:1, R<sub>f</sub> = 0.3). IR  $\nu_{\max}$  (cm<sup>-1</sup>): 3404, 3280, 3150, 1655, 1551, 1526, 1343, 1049, 1024, 997, 824, 560, 522. <sup>1</sup>H NMR (500 MHz, CDCl<sub>3</sub> + DMSO-d<sub>6</sub>)  $\delta$  10.02 (bs, 1H), 8.20-8.14 (m, 4H), 7.60 (d, *J* = 7.0, 2H), 7.39 (d, *J* = 7.7 Hz, 1H), 7.35-7.31 (m, 2H), 7.22-7.15 (m, 4H), 7.09-7.07 (m, 5H), 6.97-6.95 (m, 1H). <sup>13</sup>C NMR (125

MHz, CDCl<sub>3</sub> + DMSO-d<sub>6</sub>)  $\delta$  162.0, 152.1, 147.7, 143.1, 139.7, 137.9, 134.8, 128.1, 128.0, 127.9, 127.8, 127.4, 127.2, 126.2, 124.4, 124.3, 123.3, 123.1, 123.0, 122.0, 121.5, 63.1. MS (ESI)  $m/z$  = 449 (M + H)<sup>+</sup>; (ESI-HRMS) calculated for C<sub>27</sub>H<sub>21</sub>O<sub>3</sub>N<sub>4</sub> (M+H)<sup>+</sup> = 449.1608, found 449.1599.

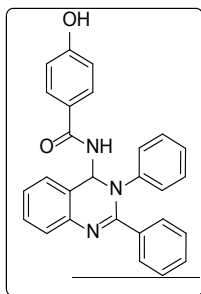

**N-(2,3-diphenyl-3,4-dihydroquinazolin-4-yl)-4-hydroxybenzamide (5c).**

White solid. Isolated yield: 55%. mp 190-192 °C. (Petroleum ether/ethyl acetate = 2:1, R<sub>f</sub> = 0.5). IR  $\nu_{\max}$  (cm<sup>-1</sup>): 3249, 2926, 1643, 1546, 1492, 1331, 1236, 1046, 970, 764, 689, 544, 474. <sup>1</sup>H NMR (300 MHz, CDCl<sub>3</sub> + DMSO-d<sub>6</sub>)  $\delta$  9.51 (bs, 1H), 8.77 (bs, 1H), 7.74 (d,  $J$  = 8.6 Hz, 2H), 7.59-7.55 (m, 2H), 7.38 (d,  $J$  = 8.4 Hz, 1H), 7.31-7.27 (m, 2H), 7.18-7.02 (m, 9H), 6.90 (t,  $J$  = 6.9 Hz, 1H), 6.72 (d,  $J$  = 8.6 Hz, 2H). <sup>13</sup>C NMR (125 MHz, CDCl<sub>3</sub> + DMSO-d<sub>6</sub>)  $\delta$  164.3, 159.7, 152.9, 143.7, 140.3, 135.5, 128.9, 128.7, 128.6, 128.3, 127.8, 127.6, 126.7, 125.0, 124.7, 123.6, 123.5, 123.2, 113.9, 63.3. MS (ESI)  $m/z$  = 420 (M + H)<sup>+</sup>; (ESI-HRMS) calculated for C<sub>27</sub>H<sub>22</sub>O<sub>2</sub>N<sub>3</sub> (M+H)<sup>+</sup> = 420.1706, found 420.1704.

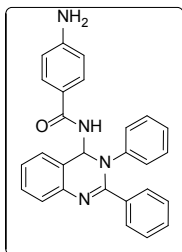

**4-amino-N-(2,3-diphenyl-3,4-dihydroquinazolin-4-yl)benzamide (5d).**

White solid. Isolated yield: 65%. mp 165-167 °C. (Petroleum ether/ethyl acetate = 2:1, R<sub>f</sub> = 0.4). IR  $\nu_{\max}$  (cm<sup>-1</sup>): 3360, 2931, 2856, 1606, 1545, 1490, 1322, 1243, 1027, 843, 764, 696, 556, 506. <sup>1</sup>H NMR (300 MHz, CDCl<sub>3</sub>)  $\delta$  7.69 (d,  $J$  = 9.2 Hz, 2H), 7.59-7.56 (m, 3H), 7.46-7.40 (m, 1H), 7.34-7.26 (m, 7H), 7.20-7.12 (m, 3H), 7.03-6.98 (m, 1H), 6.72 (d,  $J$  = 9.2 Hz, 1H), 6.61 (d,  $J$  = 8.4 Hz, 2H), 3.98 (s, 2H). <sup>13</sup>C NMR (125 MHz, CDCl<sub>3</sub>)  $\delta$  165.1, 154.4, 150.0, 144.1, 141.3, 135.9, 129.9, 129.7, 129.3, 129.1, 128.8, 128.2, 126.2, 125.7, 124.8, 124.7, 124.3, 123.9, 122.8, 114.0, 64.4. MS (ESI)  $m/z$  = 419 (M + H)<sup>+</sup>; (ESI-HRMS) calculated for C<sub>27</sub>H<sub>23</sub>ON<sub>4</sub> (M+H)<sup>+</sup> = 419.1866, found 419.1867.

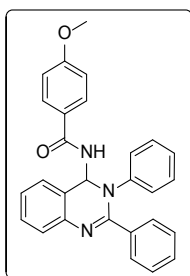

**N-(2,3-diphenyl-3,4-dihydroquinazolin-4-yl)-4-methoxybenzamide (5e).**

White solid. Isolated yield: 94%. mp 160-162 °C. (Petroleum ether/ethyl acetate = 2:1, Rf = 0.5). IR  $\nu_{\max}$  (cm<sup>-1</sup>): 3372, 3249, 2924, 1648, 1545, 1490, 1392, 1250, 1033, 968, 846, 568, 466. <sup>1</sup>H NMR (300 MHz, CDCl<sub>3</sub>)  $\delta$  7.84 (d, *J* = 8.6 Hz, 2H), 7.59-7.51 (m, 3H), 7.39-7.12 (m, 12H), 6.99 (t, *J* = 7.3 Hz, 1H), 6.90 (d, *J* = 8.8 Hz, 2H), 3.81 (s, 3H). <sup>13</sup>C NMR (125 MHz, CDCl<sub>3</sub>)  $\delta$  165.0, 162.6, 154.4, 144.1, 141.2, 135.7, 129.9, 129.7, 129.3, 129.2, 128.8, 128.1, 126.3, 125.7, 124.8, 124.7, 124.4, 123.7, 113.7, 64.6, 55.3. MS (ESI) *m/z* = 434 (M + H)<sup>+</sup>; (ESI-HRMS) calculated for C<sub>28</sub>H<sub>24</sub>O<sub>2</sub>N<sub>3</sub> (M+H)<sup>+</sup> = 434.1863, found 434.1862.

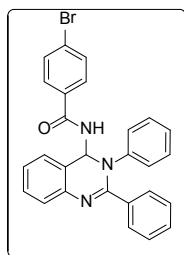

**4-bromo-N-(2,3-diphenyl-3,4-dihydroquinazolin-4-yl)benzamide (5f).**

White solid. Isolated yield: 84%. mp 190-192 °C. (Petroleum ether/ethyl acetate = 2:1, Rf = 0.6). IR  $\nu_{\max}$  (cm<sup>-1</sup>): 3306, 2930, 2857, 1657, 1544, 1483, 1326, 1243, 1019, 951, 844, 762, 697, 533, 477. <sup>1</sup>H NMR (500 MHz, CDCl<sub>3</sub>)  $\delta$  7.67 (d, *J* = 8.5 Hz, 2H), 7.61 (d, *J* = 8.5 Hz, 2H), 7.56-7.54 (m, 2H), 7.42 (t, *J* = 8.6 Hz, 1H), 7.32-7.13 (m, 12H), 7.02 (t, *J* = 7.3 Hz, 1H). <sup>13</sup>C NMR (125 MHz, CDCl<sub>3</sub>)  $\delta$  164.7, 154.4, 144.0, 141.3, 135.6, 132.5, 131.8, 130.0, 129.7, 129.5, 128.9, 128.1, 126.8, 126.4, 125.7, 124.9, 124.7, 124.4, 123.3, 64.8. MS (ESI) *m/z* = 482 (M + H)<sup>+</sup>; (ESI-HRMS) calculated for C<sub>27</sub>H<sub>21</sub>ON<sub>3</sub>Br (M+H)<sup>+</sup> = 482.0862, found 482.0865.



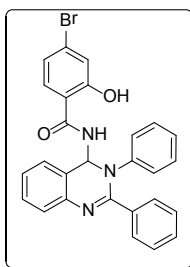

**4-bromo-N-(2,3-diphenyl-3,4-dihydroquinazolin-4-yl)-2-hydroxybenzamide (5g).**

White solid. Isolated yield: 76%. mp 203-205 °C. (Petroleum ether/ethyl acetate = 2:1, Rf = 0.7). IR  $\nu_{\max}$  (cm<sup>-1</sup>): 2929, 2380, 1655, 1545, 1485, 1288, 1153, 1052, 959, 698, 563, 451. <sup>1</sup>H NMR (400 MHz, CDCl<sub>3</sub> + DMSO-d<sub>6</sub>)  $\delta$  9.78 (d, *J* = 8.6 Hz, 1H), 8.25 (d, *J* = 2.3 Hz, 1H), 7.66 (d, *J* = 7.8 Hz, 1H), 7.52-7.48 (m, 1H), 7.41-7.36 (m, 3H), 7.25-7.14 (m, 11H), 7.04-7.00 (m, 1H), 6.82 (d, *J* = 8.6 Hz, 1H). <sup>13</sup>C NMR (125 MHz, CDCl<sub>3</sub> + DMSO-d<sub>6</sub>)  $\delta$  165.0, 158.4, 153.1, 143.7, 140.3, 135.3, 130.4, 128.9, 128.7, 128.3, 127.9, 127.0, 125.2, 125.1, 124.1, 123.9, 123.7, 122.7, 118.6, 116.4, 109.6, 63.4. MS (ESI) *m/z* = 498 (M + H)<sup>+</sup>; (ESI-HRMS) calculated for C<sub>27</sub>H<sub>21</sub>O<sub>2</sub>N<sub>3</sub>Br (M+H)<sup>+</sup> = 498.0811, found 498.0813.

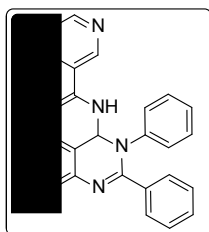

**N-(2,3-diphenyl-3,4-dihydroquinazolin-4-yl)nicotinamide (5h).**

White solid. Isolated yield: 83%. mp 173-175 °C. (Petroleum ether/ethyl acetate = 2:1, Rf = 0.2). IR  $\nu_{\max}$  (cm<sup>-1</sup>): 2932, 2856, 1660, 1588, 1485, 1324, 1241, 1032, 964, 765, 699, 533, 467. <sup>1</sup>H NMR (300 MHz, CDCl<sub>3</sub>)  $\delta$  9.04 (bs, 1H), 8.61 (d, *J* = 3.5 Hz, 1H), 8.44-8.41 (m, 1H), 8.16 (d, *J* = 7.9 Hz, 1H), 7.45-7.38 (m, 3H), 7.33-7.30 (m, 3H), 7.22-7.17 (m, 3H), 7.14 (d, *J* = 4.3 Hz, 4H), 7.11-7.05 (m, 2H), 7.03-6.97 (m, 1H). <sup>13</sup>C NMR (75 MHz, CDCl<sub>3</sub>)  $\delta$  164.1, 152.4, 148.6, 144.1, 141.2, 135.3, 129.8, 129.6, 128.9, 128.0, 126.3, 125.9, 125.0, 124.8, 124.4, 123.3, 64.8. MS (ESI) *m/z* = 405 (M + H)<sup>+</sup>; (ESI-HRMS) calculated for C<sub>26</sub>H<sub>21</sub>ON<sub>4</sub>(M+H)<sup>+</sup> = 405.1709, found 405.1705.

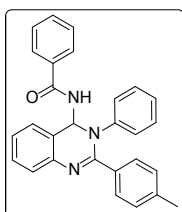

**N-(3-phenyl-2-p-tolyl-3,4-dihydroquinazolin-4-yl)benzamide (5i).**

White solid. Isolated yield: 87%. mp 206-208 °C. (Petroleum ether/ethyl acetate = 2:1, Rf = 0.5). IR  $\nu_{\max}$  (cm<sup>-1</sup>): 2926, 2855, 2313, 1686, 1584, 1548, 1483, 1389, 1276, 1184, 1044, 955, 825, 760, 696,

553, 456.  $^1\text{H}$  NMR (300 MHz,  $\text{CDCl}_3$ )  $\delta$  7.77 (d,  $J = 7.5$  Hz, 2H), 7.56 (d,  $J = 8.3$  Hz, 3H), 7.49 (d,  $J = 7.5$  Hz, 1H), 7.44-7.37 (m, 3H), 7.33-7.11 (m, 8H), 7.03 (d,  $J = 7.5$  Hz, 3H), 2.28 (s, 3H).  $^{13}\text{C}$  NMR (125 MHz,  $\text{CDCl}_3$ )  $\delta$  165.6, 154.3, 144.3, 141.5, 140.2, 133.7, 132.9, 132.0, 129.6, 129.4, 128.6, 127.2, 126.1, 125.7, 124.8, 124.6, 124.3, 123.6, 64.7, 21.3. MS (ESI)  $m/z = 418$  ( $\text{M} + \text{H}$ ) $^+$ ; (ESI-HRMS) calculated for  $\text{C}_{28}\text{H}_{24}\text{ON}_3$  ( $\text{M} + \text{H}$ ) $^+ = 418.1903$ , found 418.1903.

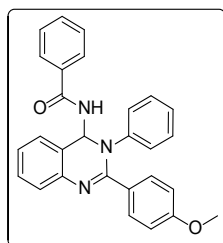

**N-(2-(4-methoxyphenyl)-3-phenyl-3,4-dihydroquinazolin-4-yl)benzamide (5j).**

White solid. Isolated yield: 82%. mp 223-224  $^{\circ}\text{C}$ , (Petroleum ether/ethyl acetate = 2:1,  $R_f = 0.5$ ). IR  $\nu_{\text{max}}$  ( $\text{cm}^{-1}$ ): 2925, 2853, 2312, 1683, 1546, 1512, 1391, 1250, 1175, 1032, 962, 837, 761, 697, 546, 499.  $^1\text{H}$  NMR (500 MHz,  $\text{CDCl}_3$ )  $\delta$  7.76 (d,  $J = 8.0$  Hz, 2H), 7.62 (d,  $J = 8.8$  Hz, 2H), 7.54 (d,  $J = 7.9$  Hz, 1H), 7.49 (t,  $J = 8.2$  Hz, 1H), 7.43-7.39 (m, 3H), 7.32-7.28 (m, 3H), 7.22-7.17 (m, 3H), 7.11 (d,  $J = 9.0$  Hz, 1H), 7.03-6.97 (m, 2H), 6.74 (d,  $J = 8.8$  Hz, 2H), 3.75 (s, 3H).  $^{13}\text{C}$  NMR (75 MHz,  $\text{CDCl}_3$ )  $\delta$  165.6, 160.9, 154.0, 144.4, 141.5, 133.7, 132.0, 131.3, 129.3, 128.9, 128.5, 127.2, 125.9, 125.7, 124.6, 124.2, 123.6, 113.5, 64.8, 55.1. MS (ESI)  $m/z = 434$  ( $\text{M} + \text{H}$ ) $^+$ ; (ESI-HRMS) calculated for  $\text{C}_{28}\text{H}_{24}\text{O}_2\text{N}_3$  ( $\text{M} + \text{H}$ ) $^+ = 434.1863$ , found 434.1858.

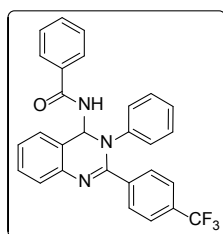

**N-(3-phenyl-2-(4-(trifluoromethyl)phenyl)-3,4-dihydroquinazolin-4-yl)benzamide (5k).**

Plae yellow solid. Isolated yield: 71%. mp 208-210  $^{\circ}\text{C}$ . (Petroleum ether/ethyl acetate = 2:1,  $R_f = 0.6$ ). IR  $\nu_{\text{max}}$  ( $\text{cm}^{-1}$ ): 2932, 2886, 2311, 1658, 1548, 1403, 1324, 1238, 1129, 1065, 969, 845, 762, 699, 548, 499.  $^1\text{H}$  NMR (300 MHz,  $\text{CDCl}_3$ )  $\delta$  7.78 (d,  $J = 7.5$  Hz, 4H), 7.58 (d,  $J = 7.5$  Hz, 1H), 7.51-7.39 (m, 6H), 7.35-7.14 (m, 8H), 7.09-6.97 (m, 1H).  $^{13}\text{C}$  NMR (75 MHz,  $\text{CDCl}_3$ )  $\delta$  165.7, 153.0, 143.6, 141.0, 139.2, 133.5, 132.2, 129.9, 129.6, 129.2, 128.7, 127.2, 126.9, 125.9, 125.3, 125.0, 124.4, 123.3, 64.7. MS (ESI)  $m/z = 472$  ( $\text{M} + \text{H}$ ) $^+$ ; (ESI-HRMS) calculated for  $\text{C}_{28}\text{H}_{21}\text{ON}_3\text{F}_3$  ( $\text{M} + \text{H}$ ) $^+ = 472.1631$ , found 472.1628.

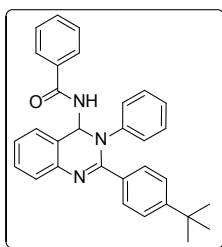

**N-(2-(4-tert-butylphenyl)-3-phenyl-3,4-dihydroquinazolin-4-yl)benzamide (5l).**

White solid. Isolated yield: 83%. mp 258-260 °C. (Petroleum ether/ethyl acetate = 2:1, Rf = 0.6). IR  $\nu_{\max}$  (cm<sup>-1</sup>): 2938, 2385, 2310, 1661, 1542, 1492, 1392, 1233, 1054, 944, 844, 761, 699, 635, 545. <sup>1</sup>H NMR (500 MHz, DMSO-d<sub>6</sub>)  $\delta$  9.77 (d, *J* = 8.3 Hz, 1H), 8.30 (s, 1H), 7.92 (d, *J* = 7.1 Hz, 2H), 7.55 (d, *J* = 8.1 Hz, 2H), 7.46-7.39 (m, 4H), 7.32-7.29 (m, 3H), 7.23-7.18 (m, 5H), 7.05-6.99 (m, 2H), 1.21 (s, 9H). <sup>13</sup>C NMR (75 MHz, DMSO-d<sub>6</sub>)  $\delta$  165.2, 153.2, 152.2, 144.8, 141.3, 133.5, 131.6, 129.2, 128.9, 128.1, 127.8, 125.6, 124.6, 124.2, 79.1, 64.4, 34.4, 30.9. MS (ESI) *m/z* = 460 (M + H)<sup>+</sup>; (ESI-HRMS) calculated for C<sub>31</sub>H<sub>30</sub>ON<sub>3</sub> (M+H)<sup>+</sup> = 460.2383, found 460.2370.

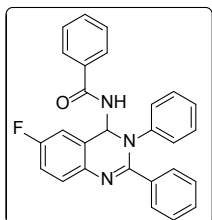

**N-(6-fluoro-2,3-diphenyl-3,4-dihydroquinazolin-4-yl)benzamide (5m).**

White solid. Isolated yield: 85%. mp 234-236 °C. (Petroleum ether/ethyl acetate = 2:1, Rf = 0.5). IR  $\nu_{\max}$  (cm<sup>-1</sup>): 2925, 2855, 1739, 1655, 1554, 1521, 1487, 1379, 1321, 1245, 1136, 1071, 948, 830, 754, 697, 546, 520. <sup>1</sup>H NMR (500 MHz, CDCl<sub>3</sub>)  $\delta$  7.83 (d, *J* = 7.3 Hz, 2H), 7.57 (d, *J* = 8.2 Hz, 2H), 7.54-7.48 (m, 2H), 7.44 (t, *J* = 7.4 Hz, 2H), 7.31-7.25 (m, 2H), 7.21-7.07 (m, 8H), 7.03 (d, *J* = 7.1 Hz, 2H). <sup>13</sup>C NMR (125 MHz, CDCl<sub>3</sub>)  $\delta$  165.7, 161.7, 159.7, 153.8, 144.0, 137.7, 135.3, 133.6, 132.1, 129.9, 129.6, 128.9, 128.6, 128.1, 127.4, 126.2, 125.0, 124.6, 124.3, 116.7, 116.5, 112.2, 64.3. MS (ESI) *m/z* = 329 (M + H)<sup>+</sup>; (ESI-HRMS) calculated for C<sub>27</sub>H<sub>21</sub>ON<sub>3</sub>F (M+H)<sup>+</sup> = 422.1654, found 422.1655.

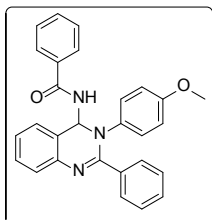

**N-(3-(4-methoxyphenyl)-2-phenyl-3,4-dihydroquinazolin-4-yl)benzamide (5n).**

White solid. Isolated yield: 73%. mp 206-208 °C. (Petroleum ether/ethyl acetate = 2:1, Rf = 0.5). IR  $\nu_{\max}$  (cm<sup>-1</sup>): 2958, 2927, 1647, 1547, 1510, 1483, 1394, 1324, 1245, 1178, 1125, 1033, 833, 766, 697, 558, 542, 494, 462. <sup>1</sup>H NMR (300 MHz, CDCl<sub>3</sub>)  $\delta$  7.82 (d, *J* = 7.5 Hz, 2H), 7.62 (d, *J* = 6.7 Hz, 2H),

7.55-7.48 (m, 2H), 7.46 (d,  $J = 7.5$  Hz, 3H), 7.34-7.27 (m, 3H), 7.24-7.09 (m, 7H), 6.70 (d,  $J = 9.0$  Hz, 1H), 3.70 (s, 3H).  $^{13}\text{C}$  NMR (125 MHz,  $\text{CDCl}_3$ )  $\delta$  165.6, 156.9, 154.6, 141.3, 137.3, 135.7, 133.7, 132.0, 129.7, 128.5, 128.0, 127.3, 126.1, 125.8, 124.6, 123.2, 114.1, 65.0, 55.2. MS (ESI)  $m/z = 434$  ( $\text{M} + \text{H}$ ) $^+$ ; (ESI-HRMS) calculated for  $\text{C}_{28}\text{H}_{24}\text{O}_2\text{N}_2$  ( $\text{M} + \text{H}$ ) $^+ = 434.1849$ , found 434.1851.

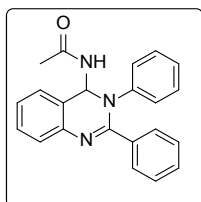

**N-(2,3-diphenyl-3,4-dihydroquinazolin-4-yl)acetamide (5o).**

White solid. Isolated yield: 76%. mp 240-242 °C, (Petroleum ether/ethyl acetate = 1:2,  $R_f = 0.2$ ). IR  $\nu_{\text{max}}$  ( $\text{cm}^{-1}$ ): 3418, 2963, 2892, 1703, 1583, 1547, 1398, 1359, 1252, 1197, 1150, 1056, 969, 894, 843, 611, 557.  $^1\text{H}$  NMR (300 MHz,  $\text{DMSO-d}_6$ )  $\delta$  9.17 (d,  $J = 8.6$  Hz, 1H), 7.59 (d,  $J = 7.7$  Hz, 2H), 7.42 (d,  $J = 3.7$  Hz, 2H), 7.32-7.29 (m, 3H), 7.25-7.12 (m, 6H), 7.02 (t,  $J = 6.7$  Hz, 1H), 6.71 (d,  $J = 8.6$  Hz, 1H), 1.88 (s, 3H).  $^{13}\text{C}$  NMR (125 MHz,  $\text{DMSO-d}_6$ )  $\delta$  168.4, 153.4, 144.4, 136.1, 129.8, 129.4, 129.0, 128.0, 126.0, 125.9, 124.7, 124.4, 124.2, 124.1, 63.5, 22.6. MS (ESI)  $m/z = 342$  ( $\text{M} + \text{H}$ ) $^+$ ; (ESI-HRMS) calculated for  $\text{C}_{22}\text{H}_{20}\text{ON}_3$  ( $\text{M} + \text{H}$ ) $^+ = 342.1600$ , found 342.1597.

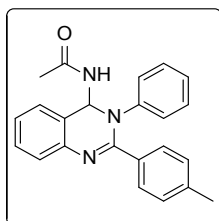

**N-(3-phenyl-2-(p-tolyl)-3,4-dihydroquinazolin-4-yl)acetamide (5p).**

White solid. Isolated yield: 78%. mp 238-240 °C. (Petroleum ether/ethyl acetate = 1:2,  $R_f = 0.4$ ). IR  $\nu_{\text{max}}$  ( $\text{cm}^{-1}$ ): 3207, 2931, 1659, 1540, 1395, 1286, 1237, 1063, 836, 696, 550, 496.  $^1\text{H}$  NMR (500 MHz,  $\text{CDCl}_3$ )  $\delta$  8.19 (bs, 1H), 7.28-7.26 (m, 3H), 7.23-7.20 (m, 1H), 7.13-7.02 (m, 6H), 6.99-6.95 (m, 1H), 6.91-6.85 (m, 3H), 2.26 (s, 3H), 2.21 (s, 3H).  $^{13}\text{C}$  NMR (125 MHz,  $\text{CDCl}_3$ )  $\delta$  168.4, 154.6, 144.3, 140.9, 139.8, 132.2, 129.6, 129.0, 128.7, 128.6, 125.8, 125.5, 124.6, 124.3, 123.6, 63.8, 23.6, 21.3. MS (ESI)  $m/z = 356$  ( $\text{M} + \text{H}$ ) $^+$ ; (ESI-HRMS) calculated for  $\text{C}_{23}\text{H}_{22}\text{ON}_3$  ( $\text{M} + \text{H}$ ) $^+ = 356.1746$ , found 356.1747.

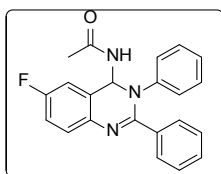

**N-(6-fluoro-2,3-diphenyl-3,4-dihydroquinazolin-4-yl)acetamide (5q).**

White solid. Isolated yield: 78%. mp 264-266 °C. (Petroleum ether/ethyl acetate = 1:2, Rf = 0.3). IR  $\nu_{\max}$  (cm<sup>-1</sup>): 3395, 3269, 1637, 1547, 1488, 1365, 1237, 1033, 754, 692, 524, 485, 449. <sup>1</sup>H NMR (300 MHz, CDCl<sub>3</sub> + DMSO-d<sub>6</sub>)  $\delta$  9.15 (bs, 1H), 7.86-7.75 (m, 1H), 7.55 (d, *J* = 7.1 Hz, 2H), 7.38-7.34 (m, 1H), 7.21-7.17 (m, 2H), 7.09-7.03 (m, 5H), 6.94 (d, *J* = 6.0 Hz, 2H), 6.71 (d, *J* = 8.6 Hz, 1H), 1.90 (s, 3H). <sup>13</sup>C NMR (125 MHz, CDCl<sub>3</sub> + DMSO-d<sub>6</sub>)  $\delta$  167.3, 159.7, 157.7, 151.7, 142.9, 136.2, 134.5, 128.1, 127.2, 126.4, 124.7, 124.0, 123.2, 122.7, 114.5, 114.3, 61.9, 21.3. MS (ESI) *m/z* = 360 (M + H)<sup>+</sup>; (ESI-HRMS) calculated for C<sub>22</sub>H<sub>19</sub>ON<sub>3</sub>F (M+H)<sup>+</sup> = 360.1506, found 360.1507.

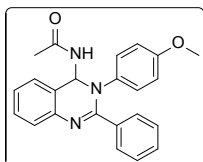

**N-(3-(4-methoxyphenyl)-2-phenyl-3,4-dihydroquinazolin-4-yl)acetamide (5r).**

White solid. Isolated yield: 68%. mp 220-222 °C. (Petroleum ether/ethyl acetate = 1:2, Rf = 0.2). IR  $\nu_{\max}$  (cm<sup>-1</sup>): 3064, 2931, 1653, 1542, 1509, 1369, 1245, 1179, 1144, 1068, 1033, 833, 765, 696, 519, 458. <sup>1</sup>H NMR (500 MHz, CDCl<sub>3</sub>)  $\delta$  7.43 (d, *J* = 6.8 Hz, 1H), 7.38-7.33 (m, 1H), 7.30-7.07 (m, 8H), 7.02 (d, *J* = 8.2 Hz, 2H), 6.81 (d, *J* = 9.4 Hz, 1H), 6.64 (t, *J* = 8.0 Hz, 2H), 3.68 (s, 3H), 2.16 (bs, 3H). <sup>13</sup>C NMR (75 MHz, CDCl<sub>3</sub>)  $\delta$  168.4, 156.9, 154.8, 140.9, 137.3, 135.2, 129.7, 129.4, 129.0, 127.8, 126.1, 125.9, 125.6, 123.6, 123.2, 113.9, 64.0, 55.2. MS (ESI) *m/z* = 372 (M + H)<sup>+</sup>; (ESI-HRMS) calculated for C<sub>23</sub>H<sub>22</sub>O<sub>2</sub>N<sub>3</sub> (M+H)<sup>+</sup> = 372.1705, found 372.1705.

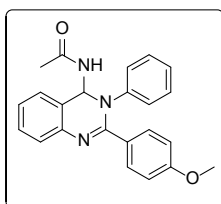

**N-(2-(4-methoxyphenyl)-3-phenyl-3,4-dihydroquinazolin-4-yl)acetamide (5s).**

White solid. Isolated yield: 69%. mp 240-242 °C, (Petroleum ether/ethyl acetate = 1:2, Rf = 0.4). IR  $\nu_{\max}$  (cm<sup>-1</sup>): 2938, 2382, 1677, 1544, 1512, 1388, 1285, 1241, 1175, 1063, 985, 842, 698, 533, 498. <sup>1</sup>H NMR (500 MHz, CDCl<sub>3</sub> + DMSO-d<sub>6</sub>)  $\delta$  9.09 (d, *J* = 9.0 Hz, 1H), 7.54 (d, *J* = 9.0 Hz, 2H), 7.37 (bs, 2H), 7.20-7.10 (m, 6H), 6.99 (t, *J* = 6.7 Hz, 1H), 6.83 (d, *J* = 8.3 Hz, 2H), 6.67 (d, *J* = 8.3 Hz, 1H), 3.71 (s, 3H), 1.87(s, 3H). <sup>13</sup>C NMR (125 MHz, CDCl<sub>3</sub> + DMSO-d<sub>6</sub>)  $\delta$  166.3, 158.4, 151.0, 142.8, 139.4, 129.2, 126.8, 126.3, 123.8, 123.5, 122.3, 121.8, 111.4, 61.6, 53.2, 20.6. MS (ESI) *m/z* = 372 (M + H)<sup>+</sup>; (ESI-HRMS) calculated for C<sub>23</sub>H<sub>22</sub>O<sub>2</sub>N<sub>3</sub> (M+H)<sup>+</sup> = 372.1706, found 372.1705.

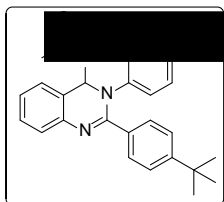

**N-(2-(4-tert-butylphenyl)-3-phenyl-3,4-dihydroquinazolin-4-yl)acetamide (5t).**

White solid. Isolated yield: 77%. mp 258-260 °C. (Petroleum ether/ethyl acetate = 1:2, R<sub>f</sub> = 0.4). IR  $\nu_{\max}$  (cm<sup>-1</sup>): 2966, 2936, 2379, 1676, 1540, 1398, 1328, 1239, 1066, 984, 841, 697, 629, 548, 461. <sup>1</sup>H NMR (500 MHz, CDCl<sub>3</sub>)  $\delta$  7.48 (d, *J* = 8.2 Hz, 1H), 7.44-7.26 (m, 4H), 7.21-7.11 (m, 8H), 7.01-6.97 (m, 1H), 6.86 (d, *J* = 9.3 Hz, 1H), 2.10 (bs, 3H), 1.25 (s, 9H). <sup>13</sup>C NMR (75 MHz, CDCl<sub>3</sub>)  $\delta$  168.4, 154.5, 152.9, 144.3, 140.9, 132.1, 129.4, 129.0, 128.7, 125.9, 125.4, 124.7, 124.5, 124.3, 123.6, 63.8, 34.6, 31.0, 23.6. MS (ESI) *m/z* = 398 (M + H)<sup>+</sup>; (ESI-HRMS) calculated for C<sub>26</sub>H<sub>28</sub>ON<sub>3</sub> (M+H)<sup>+</sup> = 398.2226, found 398.2223.

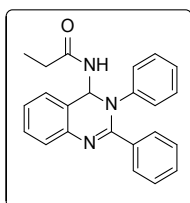

**N-(2,3-diphenyl-3,4-dihydroquinazolin-4-yl)propionamide (5u).**

White solid. Isolated yield: 81%. mp 238-240 °C. (Petroleum ether/ethyl acetate = 2:1, R<sub>f</sub> = 0.5). IR  $\nu_{\max}$  (cm<sup>-1</sup>): 3420, 3328, 2946, 2892, 1682, 1582, 1545, 1389, 1365, 1242, 1197, 1145, 1065, 968, 879, 843, 693, 545. <sup>1</sup>H NMR (300 MHz, CDCl<sub>3</sub>)  $\delta$  7.49 (d, *J* = 6.9 Hz, 2H), 7.37 (d, *J* = 7.5 Hz, 1H), 7.32-7.22 (m, 3H), 7.19-7.09 (m, 8H), 7.00-6.95 (m, 1H), 6.89 (t, *J* = 9.2 Hz, 1H), 2.36 (q, *J* = 7.5 Hz, 2H), 2.36 (t, *J* = 7.5 Hz, 3H). <sup>13</sup>C NMR (125 MHz, CDCl<sub>3</sub>)  $\delta$  172.2, 154.4, 144.0, 141.0, 135.4, 129.7, 129.6, 129.1, 128.8, 128.0, 126.1, 125.6, 124.7, 124.3, 124.1, 123.6, 63.9, 29.7, 9.6. MS (ESI) *m/z* = 356 (M + H)<sup>+</sup>; (ESI-HRMS) calculated for C<sub>23</sub>H<sub>22</sub>ON<sub>3</sub> (M+H)<sup>+</sup> = 356.1757, found 356.1756.

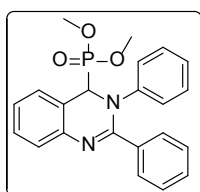

**Dimethyl 2,3-diphenyl-3,4-dihydroquinazolin-4-ylphosphonate (7a).**

White solid. Isolated yield: 93%. mp 160-162 °C. (Petroleum ether/ethyl acetate = 1:4, R<sub>f</sub> = 0.3). IR  $\nu_{\max}$  (cm<sup>-1</sup>): 3061, 2955, 2854, 1584, 1547, 1510, 1489, 1455, 1364, 1310, 1255, 1145, 1029, 851, 767, 698, 532, 506, 406. <sup>1</sup>H NMR (500 MHz, CDCl<sub>3</sub>)  $\delta$  7.78-7.76 (m, 2H), 7.45 (d, *J* = 7.7 Hz, 1H), 7.38-7.35 (m, 1H), 7.30-7.25 (m, 3H), 7.22-7.11 (m, 6H), 7.00 (t, *J* = 7.1 Hz, 1H), 5.34 (d, *J* = 13.4 Hz, 1H), 3.72-3.61 (m, 6H). <sup>13</sup>C NMR (125 MHz, CDCl<sub>3</sub>)  $\delta$  155.4, 145.8, 142.4, 135.7, 130.0, 129.2,

128.7, 128.2, 126.7, 126.0, 124.6, 124.2, 120.0, 61.5, 60.1, 53.6, 53.5.  $^{31}\text{P}$  NMR (202 MHz,  $\text{CDCl}_3$ ):  $\delta$  21.9. MS (ESI)  $m/z = 393$  ( $\text{M} + \text{H}^+$ ); (ESI-HRMS) calculated for  $\text{C}_{22}\text{H}_{22}\text{O}_3\text{N}_2\text{P}$  ( $\text{M} + \text{H}^+$ ) = 393.1362, found 393.1362.

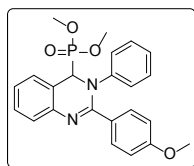

**Dimethyl (2-(4-methoxyphenyl)-3-phenyl-3,4-dihydroquinazolin-4-yl)phosphonate (7b).**

Yellow oil. Isolated yield: 83%. (Petroleum ether/ethyl acetate = 1:4,  $R_f = 0.2$ ). IR  $\nu_{\text{max}}$  ( $\text{cm}^{-1}$ ): 2954, 2929, 2853, 1583, 1546, 1485, 1364, 1307, 1252, 1174, 1146, 1029, 840, 765, 696, 539, 445, 420.  $^1\text{H}$  NMR (300 MHz,  $\text{CDCl}_3$ )  $\delta$  7.73 (d,  $J = 8.8$  Hz, 2H), 7.46 (d,  $J = 7.9$  Hz, 1H), 7.36 (t,  $J = 7.1$  Hz, 1H), 7.23-7.09 (m, 6H), 7.01 (t,  $J = 6.9$  Hz, 1H), 6.79 (d,  $J = 8.8$  Hz, 2H), 5.31 (d,  $J = 13.9$  Hz, 1H), 3.76 (s, 3H), 3.72-3.60 (m, 6H).  $^{13}\text{C}$  NMR (125 MHz,  $\text{CDCl}_3$ )  $\delta$  161.2, 155.3, 146.0, 142.2, 131.5, 129.2, 128.8, 127.5, 126.6, 125.8, 124.3, 124.3, 120.0, 113.7, 61.6, 60.3, 55.2, 53.6, 29.6.  $^{31}\text{P}$  NMR (202 MHz,  $\text{CDCl}_3$ ):  $\delta$  21.4. MS (ESI)  $m/z = 423$  ( $\text{M} + \text{H}^+$ ); (ESI-HRMS) calculated for  $\text{C}_{23}\text{H}_{24}\text{O}_4\text{N}_2\text{P}$  ( $\text{M} + \text{H}^+$ ) = 423.1468, found 423.1461.

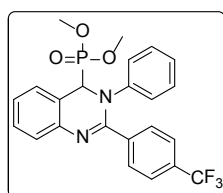

**Dimethyl 3-phenyl-2-(4-(trifluoromethyl)phenyl)-3,4-dihydroquinazolin-4-ylphosphonate (7c).**

Yellow oil. Isolated yield: 92%. (Petroleum ether/ethyl acetate = 1:4,  $R_f = 0.4$ ). IR  $\nu_{\text{max}}$  ( $\text{cm}^{-1}$ ): 3453, 2927, 2855, 1586, 1550, 1486, 1457, 1368, 1322, 1254, 1231, 1168, 1125, 1031, 960, 847, 766, 696, 558, 534, 450.  $^1\text{H}$  NMR (300 MHz,  $\text{CDCl}_3$ )  $\delta$  7.91 (d,  $J = 7.5$  Hz, 2H), 7.53 (d,  $J = 8.3$  Hz, 2H), 7.46 (d,  $J = 8.3$  Hz, 1H), 7.38 (t,  $J = 7.5$  Hz, 1H), 7.25-7.12 (m, 6H), 7.06-7.00 (m, 1H), 5.34 (d,  $J = 13.5$  Hz, 1H), 3.71-3.62 (m, 6H).  $^{13}\text{C}$  NMR (75 MHz,  $\text{CDCl}_3$ )  $\delta$  153.9, 145.2, 142.0, 139.3, 131.8, 131.3, 129.9, 129.4, 129.0, 126.6, 125.2, 124.9, 124.0, 119.9, 61.8, 59.6, 53.7, 53.6, 53.5, 53.4.  $^{31}\text{P}$  NMR (202 MHz,  $\text{CDCl}_3$ ):  $\delta$  22.0. MS (ESI)  $m/z = 461$  ( $\text{M} + \text{H}^+$ ); (ESI-HRMS) calculated for  $\text{C}_{23}\text{H}_{21}\text{O}_3\text{N}_2\text{F}_3\text{P}$  ( $\text{M} + \text{H}^+$ ) = 461.1236, found 461.1221.

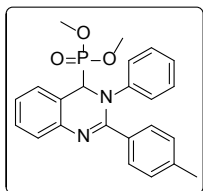

**Dimethyl 3-phenyl-2-p-tolyl-3,4-dihydroquinazolin-4-ylphosphonate (7d).**

Yellow oil. Isolated yield: 79%. (Petroleum ether/ethyl acetate = 1:4, R<sub>f</sub> = 0.2). IR  $\nu_{\text{max}}$  (cm<sup>-1</sup>): 2954, 2926, 2854, 1583, 1546, 1483, 1455, 1365, 1280, 1254, 1230, 1181, 1145, 1030, 959, 827, 766, 696, 596, 536, 448. <sup>1</sup>H NMR (300 MHz, CDCl<sub>3</sub>)  $\delta$  7.67 (d, *J* = 8.3 Hz, 2H), 7.44 (d, *J* = 8.3 Hz, 1H), 7.35 (t, *J* = 6.7 Hz, 1H), 7.22-7.05 (m, 8H), 6.99 (t, *J* = 6.7 Hz, 1H), 5.32 (d, *J* = 13.5 Hz, 1H), 3.72-3.59 (m, 6H), 2.29 (s, 3H). <sup>13</sup>C NMR (125 MHz, CDCl<sub>3</sub>)  $\delta$  155.4, 146.0, 142.5, 140.3, 132.8, 129.7, 129.2, 128.9, 128.7, 126.6, 125.8, 124.5, 124.3, 124.1, 120.0, 61.5, 60.2, 53.5, 21.3. <sup>31</sup>P NMR (202 MHz, CDCl<sub>3</sub>):  $\delta$  21.6. MS (ESI) *m/z* = 407 (M + H)<sup>+</sup>; (ESI-HRMS) calculated for C<sub>23</sub>H<sub>24</sub>O<sub>3</sub>N<sub>2</sub>P (M+H)<sup>+</sup> = 407.1518, found 407.1518.

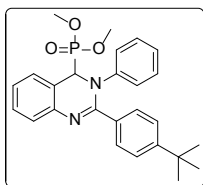

**Dimethyl 2-(4-tert-butylphenyl)-3-phenyl-3,4-dihydroquinazolin-4-ylphosphonate (7e).**

Yellow oil. Isolated yield: 89%. (Petroleum ether/ethyl acetate = 1:4, R<sub>f</sub> = 0.5). IR  $\nu_{\text{max}}$  (cm<sup>-1</sup>): 2980, 2932, 2312, 1551, 1487, 1364, 1234, 1157, 1136, 984, 766, 697, 587, 554, 462. <sup>1</sup>H NMR (500 MHz, CDCl<sub>3</sub>)  $\delta$  7.69 (d, *J* = 8.5 Hz, 2H), 7.44 (d, *J* = 7.4 Hz, 1H), 7.34 (t, *J* = 7.4 Hz, 1H), 7.27 (d, *J* = 8.2 Hz, 2H), 7.21 (d, *J* = 7.7 Hz, 2H), 7.18-7.10 (m, 4H), 6.98 (t, *J* = 7.1 Hz, 1H), 5.32 (d, *J* = 13.7 Hz, 1H), 3.72-3.58 (m, 6H), 1.24 (s, 9H). <sup>13</sup>C NMR (125 MHz, CDCl<sub>3</sub>)  $\delta$  155.4, 153.3, 146.0, 142.5, 132.7, 129.3, 128.7, 126.6, 125.8, 124.5, 124.2, 124.0, 119.9, 61.5, 60.2, 53.6, 53.5, 53.4, 34.6, 31.0. <sup>31</sup>P NMR (202 MHz, CDCl<sub>3</sub>):  $\delta$  22.0. MS (ESI) *m/z* = 449 (M + H)<sup>+</sup>; (ESI-HRMS) calculated for C<sub>26</sub>H<sub>30</sub>O<sub>3</sub>N<sub>2</sub>P (M+H)<sup>+</sup> = 449.1975, found 449.1975.

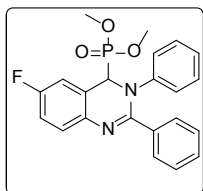

**Dimethyl 6-fluoro-2,3-diphenyl-3,4-dihydroquinazolin-4-ylphosphonate (7f).**

Yellow oil. Isolated yield: 90%. (Petroleum ether/ethyl acetate = 1:4, R<sub>f</sub> = 0.5). IR  $\nu_{\text{max}}$  (cm<sup>-1</sup>): 3439, 2955, 2927, 2855, 1590, 1552, 1487, 1364, 1239, 1181, 1030, 943, 876, 754, 699, 575, 534. <sup>1</sup>H NMR (500 MHz, CDCl<sub>3</sub>)  $\delta$  7.76 (d, *J* = 8.2 Hz, 2H), 7.42-7.39 (m, 1H), 7.30-7.25 (m, 3H), 7.20 (d, *J* = 8.3 Hz, 2H), 7.15 (t, *J* = 7.4 Hz, 2H), 7.08-6.99 (m, 2H), 6.85-6.82 (m, 1H), 5.28 (d, *J* = 14.3 Hz, 1H),



3.72-3.67 (m, 6H).  $^{13}\text{C}$  NMR (125 MHz,  $\text{CDCl}_3$ )  $\delta$  161.7, 159.8, 154.9, 145.7, 138.9, 135.5, 130.1, 129.6, 128.8, 128.3, 126.1, 124.6, 124.2, 121.5, 116.2, 116.0, 113.5, 113.3, 61.3, 60.0, 53.7, 53.6, 53.5.  $^{31}\text{P}$  NMR (202 MHz,  $\text{CDCl}_3$ ):  $\delta$  21.3. MS (ESI)  $m/z = 411$  ( $\text{M} + \text{H}$ ) $^+$ ; (ESI-HRMS) calculated for  $\text{C}_{22}\text{H}_{21}\text{O}_3\text{N}_2\text{P}$  ( $\text{M} + \text{H}$ ) $^+ = 411.1264$ , found 411.1264.

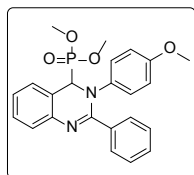

**Dimethyl 3-(4-methoxyphenyl)-2-phenyl-3,4-dihydroquinazolin-4-ylphosphonate (7g).**

Yellow oil. Isolated yield: 71%. (Petroleum ether/ethyl acetate = 1:4,  $R_f = 0.2$ ). IR  $\nu_{\text{max}}$  ( $\text{cm}^{-1}$ ): 3746, 3368, 2929, 2376, 1646, 1546, 1509, 1369, 1246, 1179, 1033, 831, 765, 620, 522.  $^1\text{H}$  NMR (500 MHz,  $\text{CDCl}_3$ )  $\delta$  7.75 (d,  $J = 7.9$  Hz, 2H), 7.43 (d,  $J = 7.0$  Hz, 1H), 7.37-7.34 (m, 1H), 7.29-7.26 (m, 3H), 7.20-7.17 (m, 3H), 7.10-7.08 (m, 1H), 6.67 (d,  $J = 9.1$  Hz, 2H), 5.24 (d,  $J = 13.4$  Hz, 1H), 3.72-3.61 (m, 9H).  $^{13}\text{C}$  NMR (125 MHz,  $\text{CDCl}_3$ )  $\delta$  156.7, 155.7, 142.6, 139.3, 135.8, 129.9, 129.8, 129.2, 128.2, 126.6, 126.0, 125.9, 124.6, 119.6, 114.0, 62.0, 60.7, 55.3, 53.6, 53.5.  $^{31}\text{P}$  NMR (202 MHz,  $\text{CDCl}_3$ ):  $\delta$  21.7. MS (ESI)  $m/z = 423$  ( $\text{M} + \text{H}$ ) $^+$ ; (ESI-HRMS) calculated for  $\text{C}_{23}\text{H}_{24}\text{O}_4\text{N}_2\text{P}$  ( $\text{M} + \text{H}$ ) $^+ = 423.1468$ , found 423.1461.

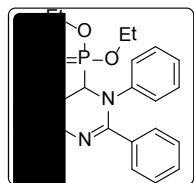

**Diethyl 2,3-diphenyl-3,4-dihydroquinazolin-4-ylphosphonate (7h).**

Yellow oil. Isolated yield: 92%. (Petroleum ether/ethyl acetate = 1:4,  $R_f = 0.4$ ). IR  $\nu_{\text{max}}$  ( $\text{cm}^{-1}$ ): 2985, 2380, 1587, 1548, 1487, 1364, 1249, 1151, 1023, 963, 837, 766, 698, 635, 543, 460.  $^1\text{H}$  NMR (500 MHz,  $\text{CDCl}_3$ )  $\delta$  7.78 (d,  $J = 7.7$  Hz, 2H), 7.44 (d,  $J = 7.7$  Hz, 1H), 7.35 (t,  $J = 7.4$  Hz, 1H), 7.29-7.22 (m, 5H), 7.19-7.11 (m, 4H), 6.99 (t,  $J = 7.3$  Hz, 1H), 5.30 (d,  $J = 13.7$  Hz, 1H), 4.15-3.92 (m, 4H), 1.23-1.19 (m, 6H).  $^{13}\text{C}$  NMR (75 MHz,  $\text{CDCl}_3$ )  $\delta$  146.0, 142.5, 135.9, 129.9, 129.7, 129.1, 128.7, 128.1, 126.7, 125.9, 124.5, 124.3, 124.2, 120.2, 63.2, 63.1, 63.0, 62.9, 62.2, 60.0, 16.4, 16.3.  $^{31}\text{P}$  NMR (202 MHz,  $\text{CDCl}_3$ ):  $\delta$  19.8. MS (ESI)  $m/z = 421$  ( $\text{M} + \text{H}$ ) $^+$ ; (ESI-HRMS) calculated for  $\text{C}_{24}\text{H}_{26}\text{O}_3\text{N}_2\text{P}$  ( $\text{M} + \text{H}$ ) $^+ = 421.1675$ , found 421.1667.

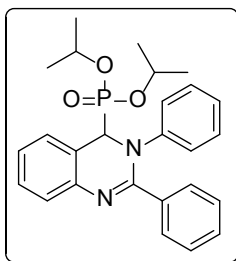

**Diisopropyl 2,3-diphenyl-3,4-dihydroquinazolin-4-ylphosphonate (7i).**

Yellow oil. Isolated yield: 87%. (Petroleum ether/ethyl acetate = 1:1, R<sub>f</sub> = 0.4). IR  $\nu_{\max}$  (cm<sup>-1</sup>): 2982, 2932, 2312, 1549, 1488, 1367, 1244, 1145, 1106, 986, 765, 697, 633, 588, 547, 467. <sup>1</sup>H NMR (500 MHz, CDCl<sub>3</sub>)  $\delta$  7.79 (d, *J* = 7.6 Hz, 2H), 7.43 (d, *J* = 7.9 Hz, 1H), 7.34 (t, *J* = 7.4 Hz, 1H), 7.29-7.23 (m, 5H), 7.18-7.12 (m, 4H), 6.97 (t, *J* = 7.1 Hz, 1H), 5.23 (d, *J* = 13.7 Hz, 1H), 4.68 (q, *J* = 6.2 Hz, 1H), 4.57 (q, *J* = 6.2 Hz, 1H), 1.27-1.24 (m, 6H), 1.19-1.18 (m, 6H). <sup>13</sup>C NMR (125 MHz, CDCl<sub>3</sub>)  $\delta$  155.3, 146.2, 142.5, 136.1, 129.8, 129.7, 128.9, 128.6, 128.0, 126.9, 125.7, 124.6, 124.2, 120.5, 72.2, 71.9, 62.3, 61.0, 24.2, 24.1, 23.8, 23.7. <sup>31</sup>P NMR (202 MHz, CDCl<sub>3</sub>):  $\delta$  17.3. MS (ESI) *m/z* = 449 (M + H)<sup>+</sup>; (ESI-HRMS) calculated for C<sub>26</sub>H<sub>30</sub>O<sub>3</sub>N<sub>2</sub>P (M+H)<sup>+</sup> = 449.1988, found 449.1976.

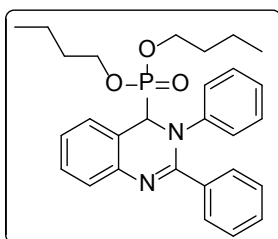

**Dibutyl (2,3-diphenyl-3,4-dihydroquinazolin-4-yl)phosphonate (7j).**

Yellow oil. Isolated yield: 90%. (Petroleum ether/ethyl acetate = 1:1, R<sub>f</sub> = 0.4). IR  $\nu_{\max}$  (cm<sup>-1</sup>): 2955, 2874, 2380, 2310, 1549, 1487, 1364, 1243, 1148, 981, 902, 844, 764, 697, 544, 466, 440. <sup>1</sup>H NMR (500 MHz, CDCl<sub>3</sub>)  $\delta$  7.78 (d, *J* = 8.2 Hz, 2H), 7.44 (d, *J* = 7.6 Hz, 1H), 7.35 (t, *J* = 9.1 Hz, 1H), 7.29-7.22 (m, 5H), 7.19-7.10 (m, 4H), 6.98 (t, *J* = 7.3 Hz, 1H), 5.30 (d, *J* = 13.7 Hz, 1H), 4.60-3.86 (m, 4H), 1.58-1.50 (m, 4H), 1.31-1.22 (m, 4H), 0.85-0.78 (m, 6H). <sup>13</sup>C NMR (125 MHz, CDCl<sub>3</sub>)  $\delta$  155.3, 146.0, 142.5, 135.9, 129.9, 129.7, 129.0, 128.6, 128.1, 126.7, 125.8, 124.5, 124.3, 124.1, 120.3, 66.8, 66.5, 65.4, 61.7, 60.4, 32.4, 32.3, 18.6, 18.5, 13.4. <sup>31</sup>P NMR (202 MHz, CDCl<sub>3</sub>):  $\delta$  20.0. MS (ESI) *m/z* = 477 (M + H)<sup>+</sup>; (ESI-HRMS) calculated for C<sub>28</sub>H<sub>34</sub>O<sub>3</sub>N<sub>2</sub>P (M+H)<sup>+</sup> = 477.2277, found 477.2286.

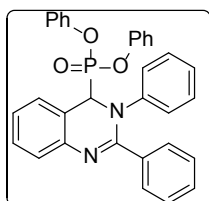

**Diphenyl 2,3-diphenyl-3,4-dihydroquinazolin-4-ylphosphonate (7k).**

Yellow oil. Isolated yield: 51%. (Petroleum ether/ethyl acetate = 1:1, R<sub>f</sub> = 0.6). IR  $\nu_{\text{max}}$  (cm<sup>-1</sup>): 2930, 2378, 1741, 1589, 1550, 1487, 1363, 1234, 1204, 1070, 937, 837, 762, 692, 564, 466. <sup>1</sup>H NMR (300 MHz, CDCl<sub>3</sub>)  $\delta$  7.79 (d, *J* = 8.0 Hz, 2H), 7.51 (d, *J* = 7.7 Hz, 1H), 7.41 (t, *J* = 7.7 Hz, 1H), 7.31-7.24 (m, 6H), 7.23-7.12 (m, 8H), 7.09-6.98 (m, 4H), 6.88 (d, *J* = 8.6 Hz, 2H), 5.70 (d, *J* = 12.3 Hz, 1H). <sup>13</sup>C NMR (125 MHz, CDCl<sub>3</sub>)  $\delta$  155.3, 150.3, 150.2, 150.0, 149.9, 146.0, 142.7, 135.7, 130.0, 129.8, 129.5, 129.4, 128.9, 128.1, 127.0, 126.2, 125.1, 124.7, 124.3, 120.6, 119.1, 62.3, 60.9. <sup>31</sup>P NMR (202 MHz, CDCl<sub>3</sub>):  $\delta$  11.9. MS (ESI) *m/z* = 517 (M + H)<sup>+</sup>; (ESI-HRMS) calculated for C<sub>32</sub>H<sub>26</sub>O<sub>3</sub>N<sub>2</sub>P (M+H)<sup>+</sup> = 517.1675, found 517.1663.

# 1. Copies of $^1\text{H}$ NMR, $^{13}\text{C}$ NMR, $^{31}\text{P}$ NMR HRMS spectra for products

## $^1\text{H}$ NMR (300 MHz, $\text{CDCl}_3$ ): (Table S1, 3a)

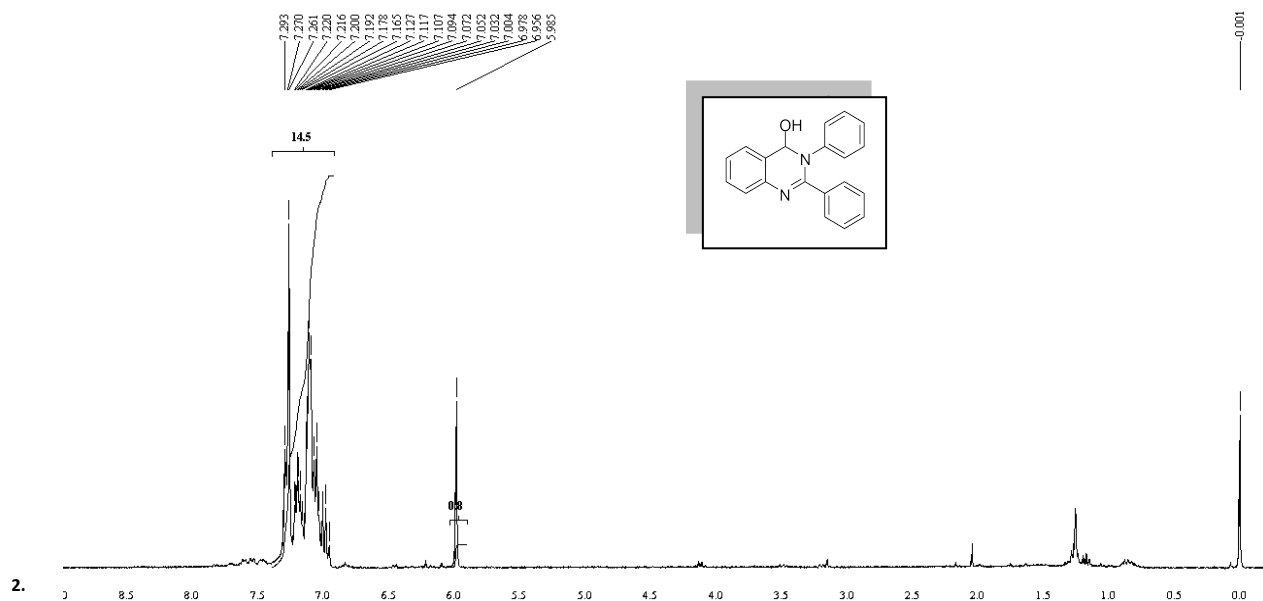

## $^{13}\text{C}$ NMR (75 MHz, $\text{CDCl}_3$ ): (Table S1, 3a)

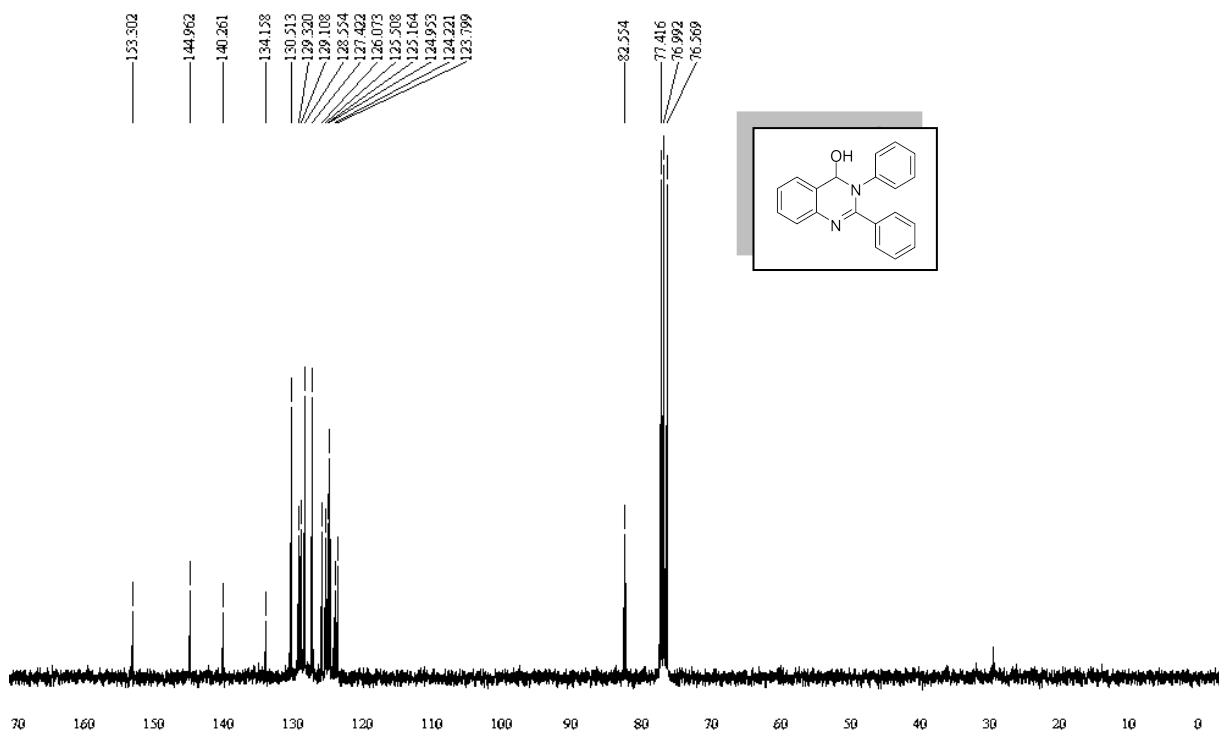

## HIGH RESOLUTION MASS SPECTRA of compound 3a in MeOH: (Table S1, 3a)

File Name CAICT-HRMS\...KRR-3-71  
Sample Name  
Sample ID G SAIDULU  
Date and Time 08-09-14 23:01:07

KRR-3-71 #6-89 RT: 0.02-0.30 AV: 84 SB: 326 0.80-1.90 NL: 1.95E8  
T: FTMS (1,1) + p ESI Full ms [100.00-2000.00]

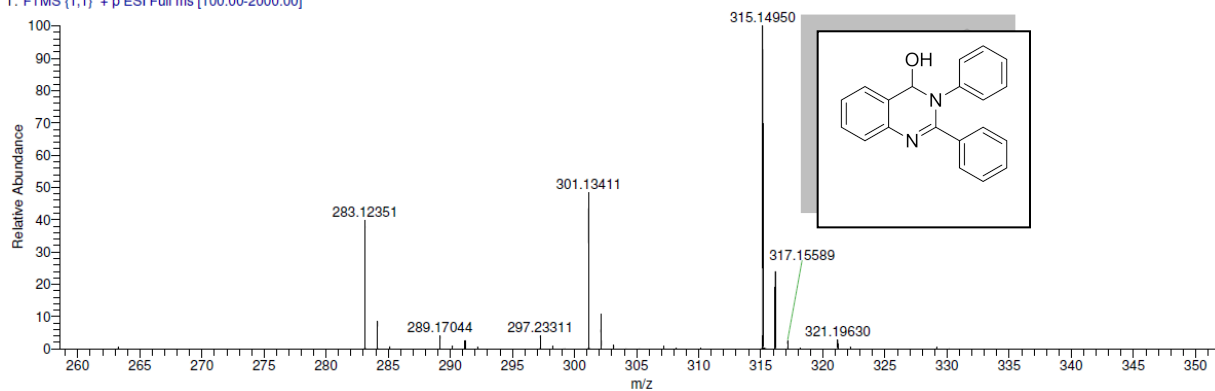

KRR-3-71#8-30 RT: 0.03-0.10 AV: 23  
T: FTMS (1,1) + p ESI Full ms [100.00-2000.00]  
m/z = 298.46-303.73

| m/z       | Intensity   | Relative | Theo. Mass | Delta (ppm) | RDB equiv. | Composition                                      |
|-----------|-------------|----------|------------|-------------|------------|--------------------------------------------------|
| 301.13408 | 121940112.0 | 100.00   | 301.13354  | 0.54        | 13.5       | C <sub>20</sub> H <sub>17</sub> O N <sub>2</sub> |

<sup>1</sup>H NMR (500 MHz, CDCl<sub>3</sub>): (Table S1, 3b)

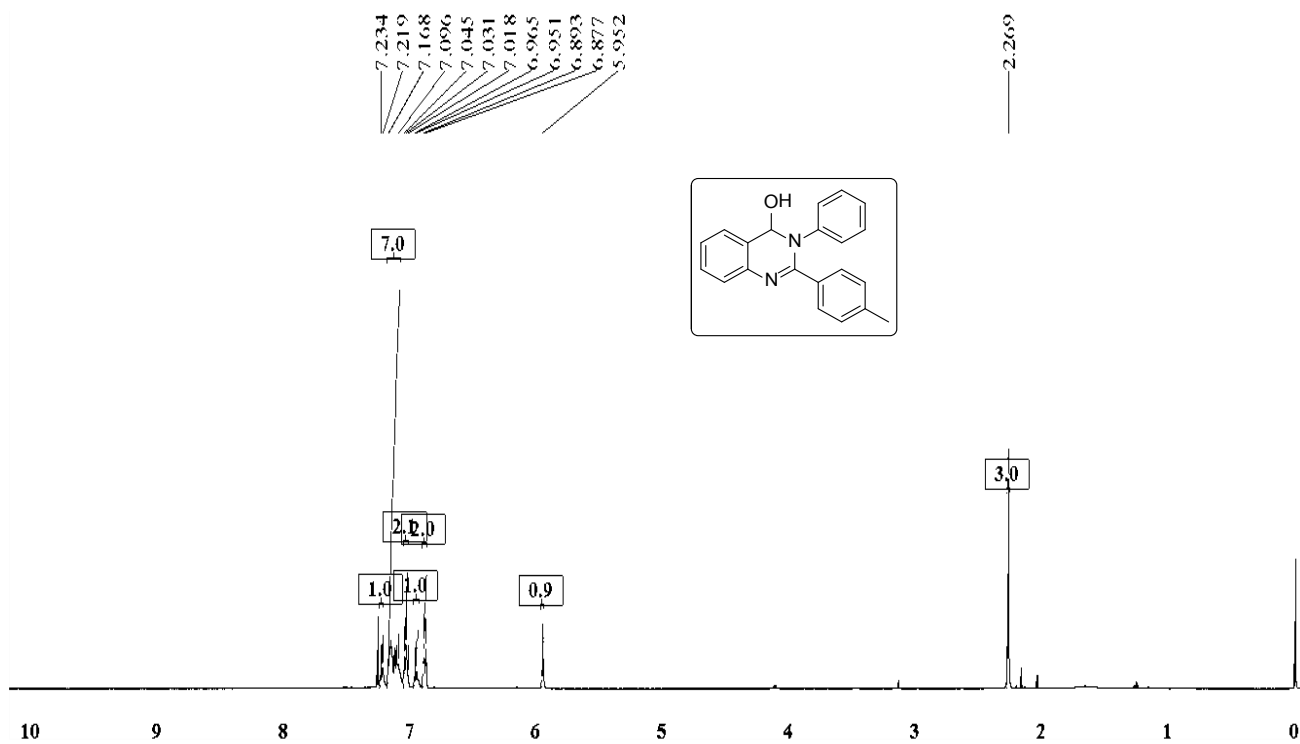

**<sup>13</sup>C NMR (75 MHz, CDCl<sub>3</sub>): (Table S1, 3b)**

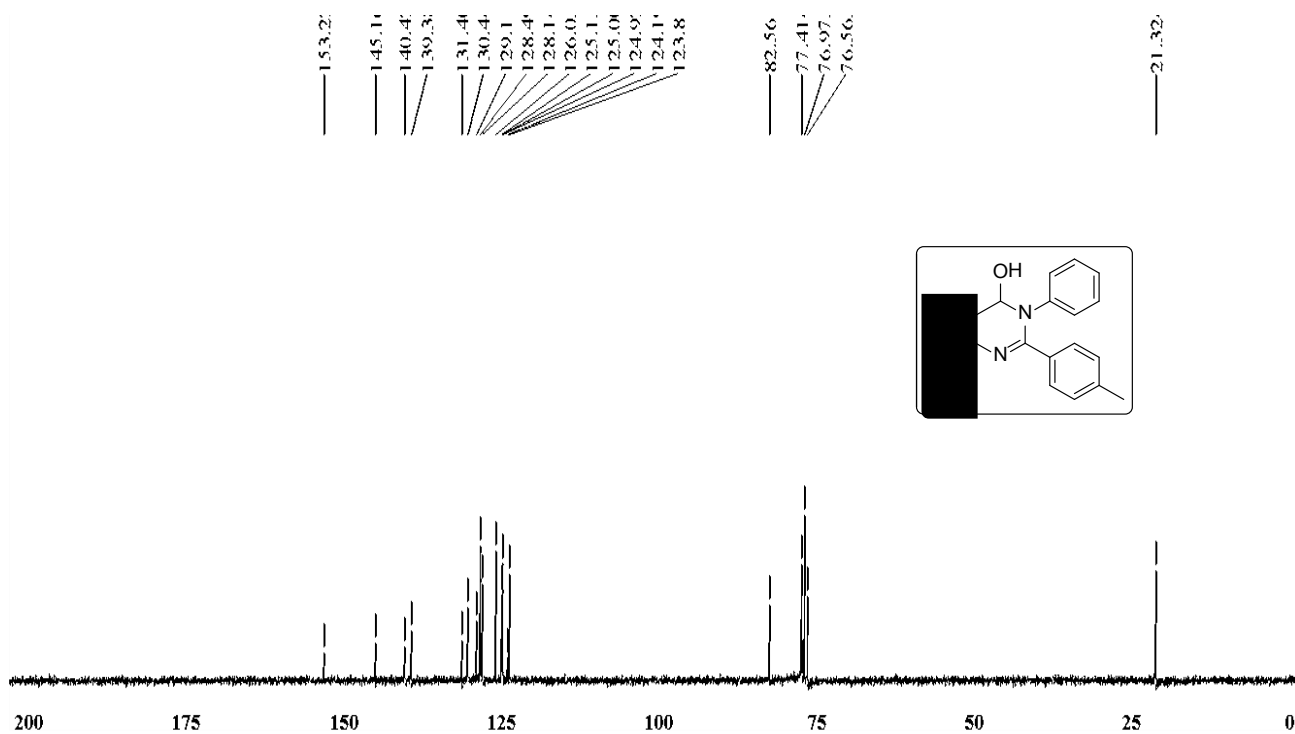

**HIGH RESOLUTION MASS SPECTRA: (Table S1, 3b)**

File Name C:\ICT-HRMS\...KRR-3-73  
Sample Name  
Sample ID G SAIDLULU  
Date and Time 08-09-14 23:03:47

KRR-3-73 #6-89 RT: 0.02-0.30 AV: 84 SB: 326 0.80-1.90 NL: 2.28E8  
I: FTMS (1,1) + p ESI Full ms [100.00-2000.00]

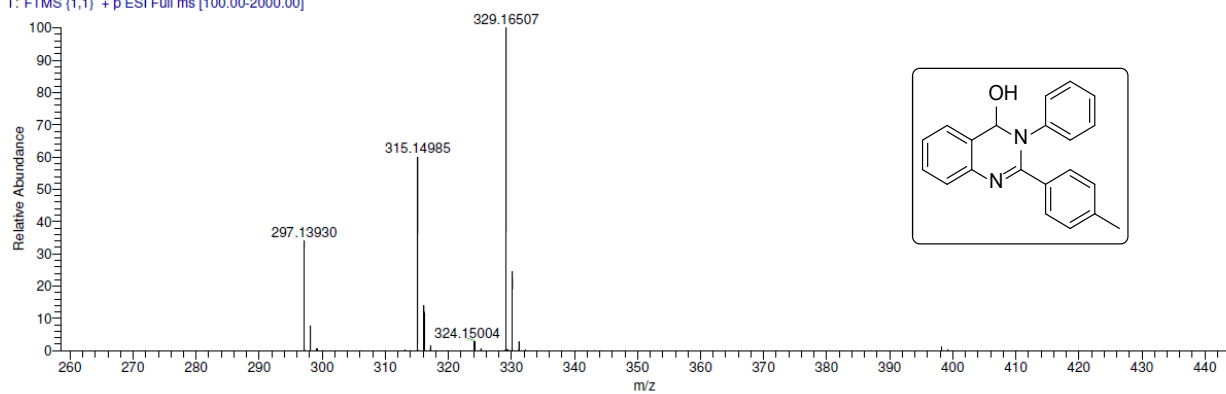

KRR-3-73#8-30 RT: 0.03-0.10 AV: 23  
I: FTMS (1,1) + p ESI Full ms [100.00-2000.00]  
n/z = 311.63-317.02

| m/z       | Intensity   | Relative | Theo. Mass | Delta (ppm) | RDB equiv. | Composition                                      |
|-----------|-------------|----------|------------|-------------|------------|--------------------------------------------------|
| 315.14973 | 189787408.0 | 100.00   | 315.14919  | 0.54        | 13.5       | C <sub>21</sub> H <sub>19</sub> O N <sub>2</sub> |

<sup>1</sup>H NMR (500 MHz, CDCl<sub>3</sub>): (Table S1, 3c)

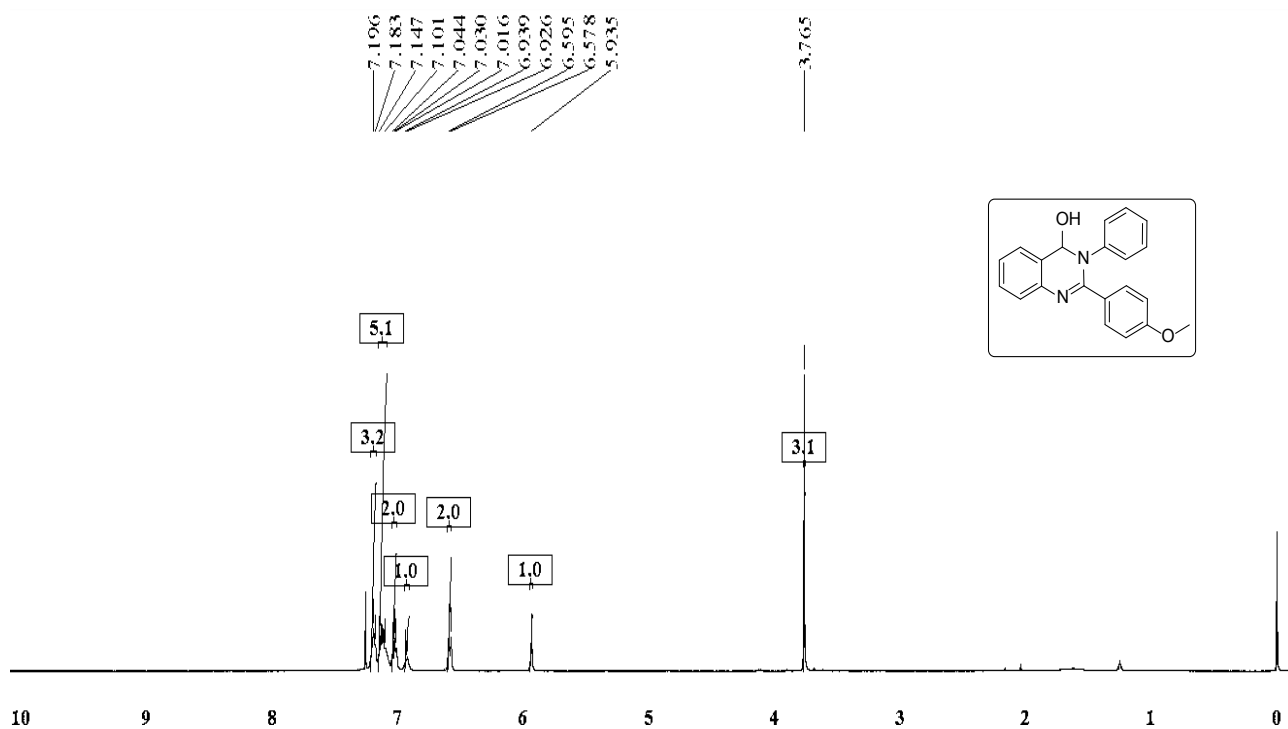

<sup>13</sup>C NMR (125 MHz, CDCl<sub>3</sub>): (Table S1, 3c)

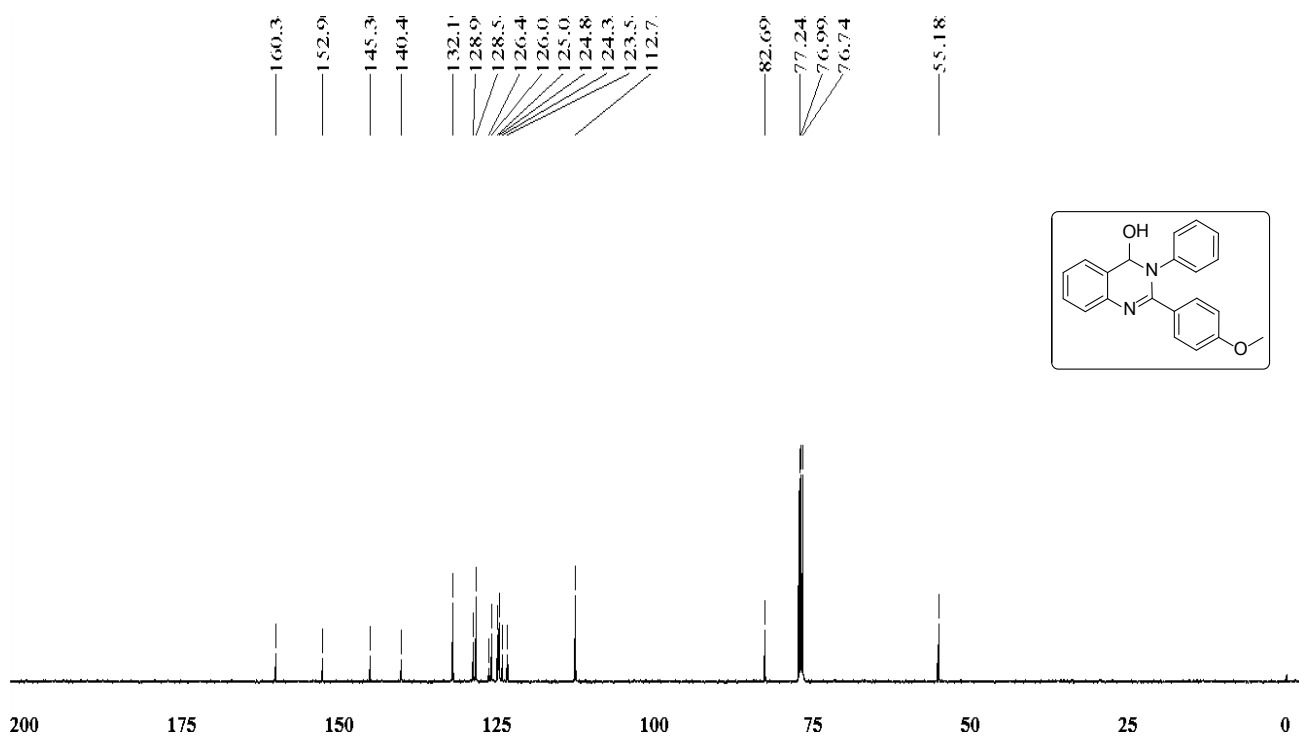

HIGH RESOLUTION MASS SPECTRA: (Table S1, 3c)



File Name C:\IICT-HRMS\...\KRR-3-74  
Sample Name  
Sample ID G SAIDULU  
Date and Time 08-09-14 23:06:27

KRR-3-74 #6-89 RT: 0.02-0.30 AV: 84 SB: 326 0.80-1.90 NL: 2.45E8  
T: FTMS {1,1} + p ESI Full ms [100.00-2000.00]

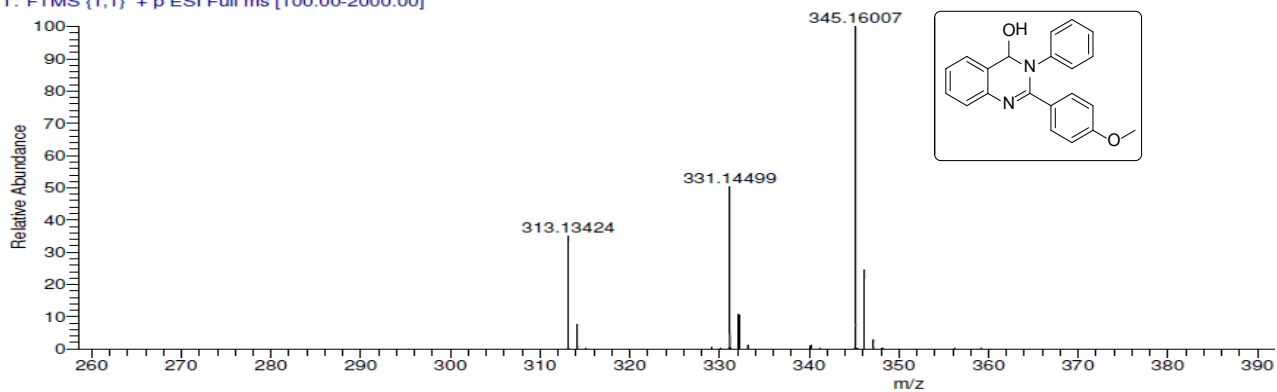

KRR-3-74#8-30 RT: 0.03-0.10 AV: 23  
T: FTMS {1,1} + p ESI Full ms [100.00-2000.00]  
m/z = 327.57-334.63

| m/z       | Intensity   | Relative | Theo. Mass | Delta (ppm) | RDB equiv. | Composition                                                   |
|-----------|-------------|----------|------------|-------------|------------|---------------------------------------------------------------|
| 331.14486 | 131950568.0 | 100.00   | 331.14410  | 0.76        | 13.5       | C <sub>21</sub> H <sub>19</sub> O <sub>2</sub> N <sub>2</sub> |

<sup>1</sup>H NMR (300 MHz, CDCl<sub>3</sub>): (Table S1, 3d)

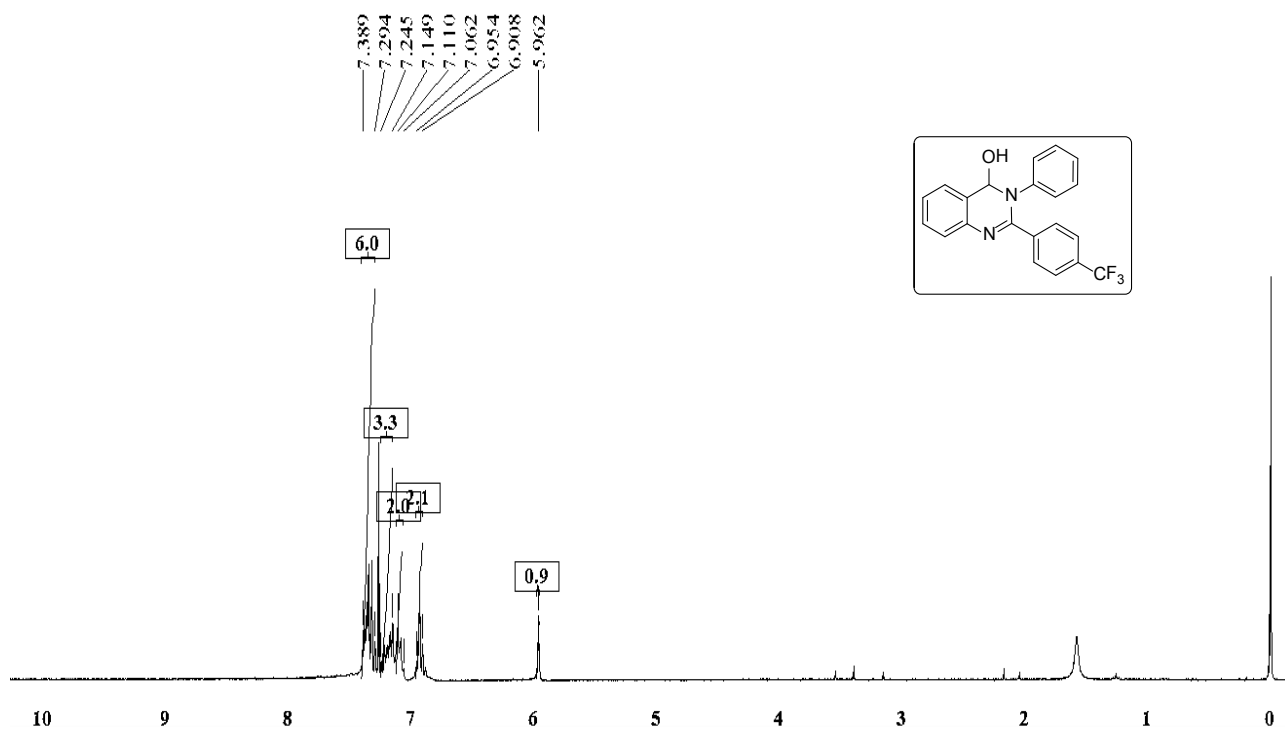

<sup>13</sup>C NMR (125 MHz, CDCl<sub>3</sub>): (Table S1, 3d)

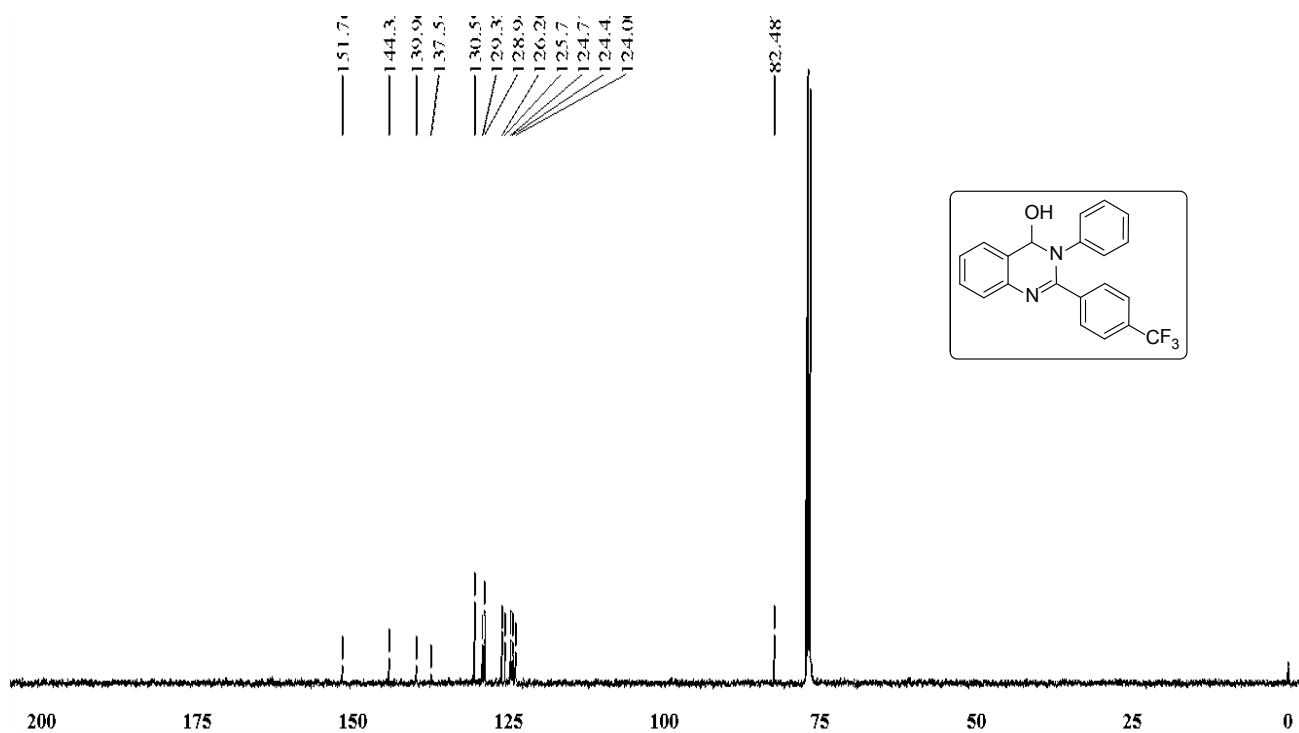

HIGH RESOLUTION MASS SPECTRA: (Table S1, 3d)

File Name C:\ICT-HRMS\...KRR-3-77  
Sample Name  
Sample ID G SAIDULU  
Date and Time 08-09-14 23:09:07

KRR-3-77 #6-89 RT: 0.02-0.30 AV: 84 SB: 326 0.80-1.90 NL: 2.81E8  
T: FTMS (1,1) + p ESI Full ms [100.00-2000.00]

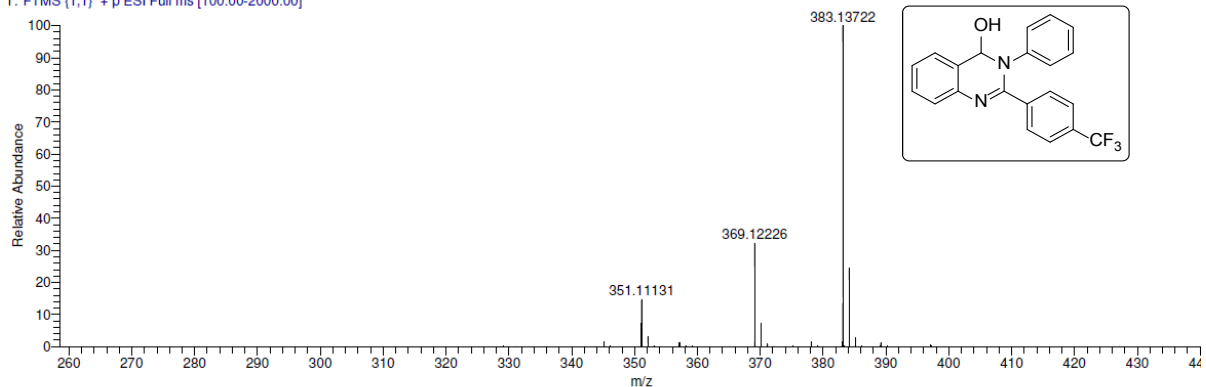

KRR-3-77#8-30 RT: 0.03-0.10 AV: 23  
T: FTMS {1,1} + p ESI Full ms [100.00-2000.00]  
m/z= 367.34-372.37

| m/z       | Intensity   | Relative | Theo. Mass | Delta (ppm) | RDB equiv. | Composition                                                     |
|-----------|-------------|----------|------------|-------------|------------|-----------------------------------------------------------------|
| 369.12204 | 114809248.0 | 100.00   | 369.12092  | 1.12        | 13.5       | C <sub>21</sub> H <sub>16</sub> O N <sub>2</sub> F <sub>3</sub> |

<sup>1</sup>H NMR (300 MHz, CDCl<sub>3</sub>): (Table S1, 3e)

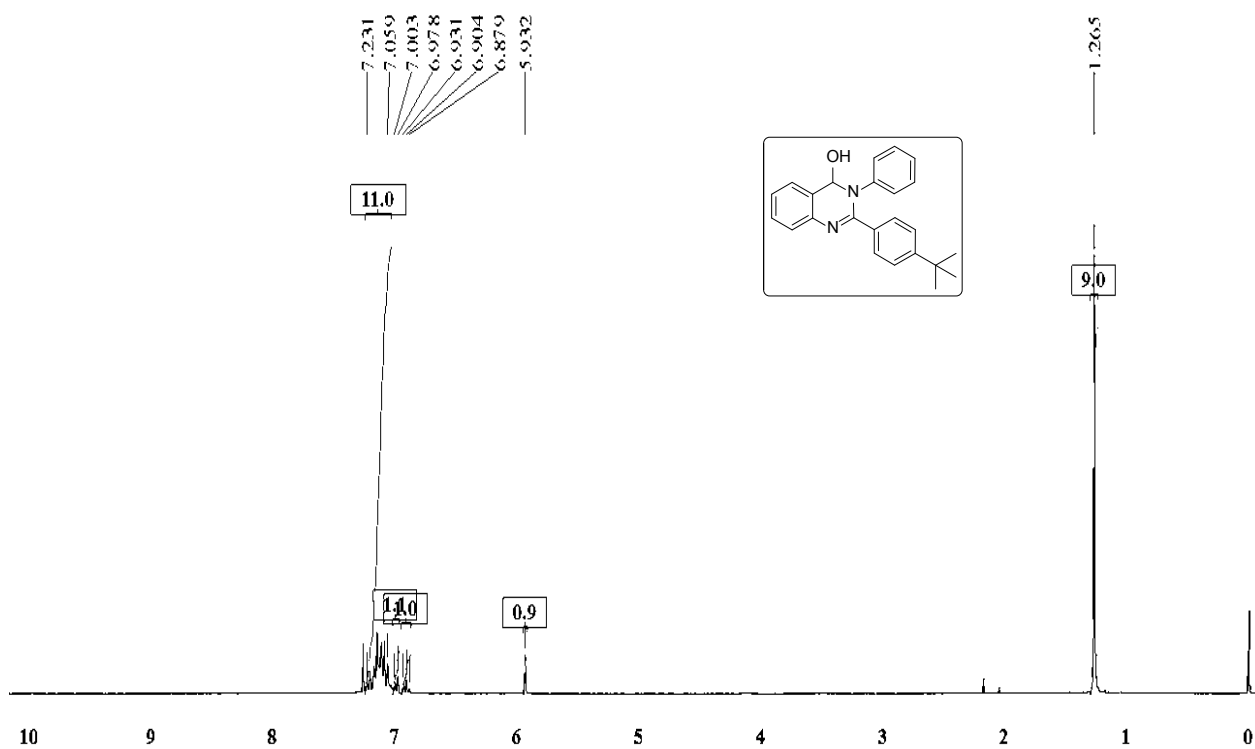

<sup>13</sup>C NMR (125 MHz, CDCl<sub>3</sub>): (Table S1, 3e)

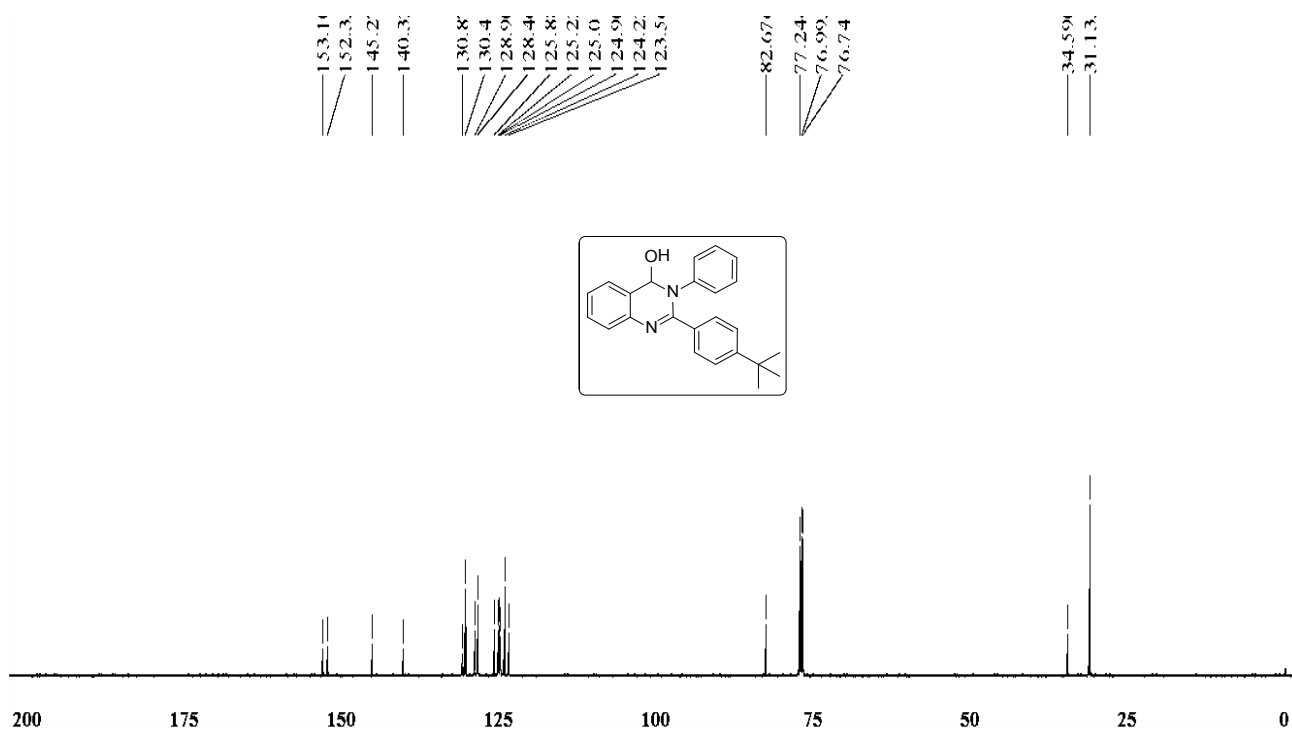

HIGH RESOLUTION MASS SPECTRA: (Table S1, 3e)

File Name CAICT-HRMS...KRR-3-79  
Sample Name  
Sample ID G SAIDULU  
Date and Time 08-09-14 23:11:48

KRR-3-79 #6-89 RT: 0.02-0.30 AV: 84 SB: 326 0.80-1.90 NL: 2.35E8  
T: FTMS (1,1) + p ESI Full ms [100.00-2000.00]

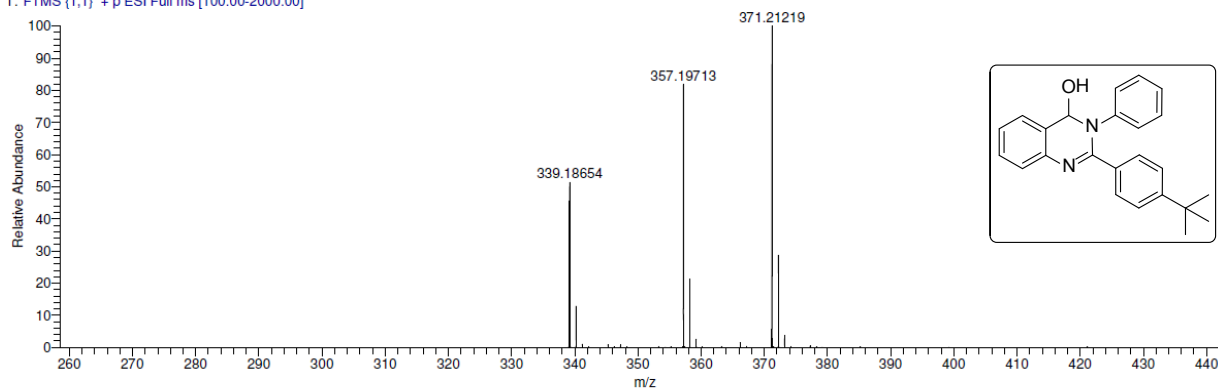

KRR-3-79#8-30 RT: 0.03-0.10 AV: 23  
T: FTMS (1,1) + p ESI Full ms [100.00-2000.00]  
m/z= 354.04-361.47

| m/z       | Intensity   | Relative | Theo. Mass | Delta (ppm) | RDB equiv. | Composition                                     |
|-----------|-------------|----------|------------|-------------|------------|-------------------------------------------------|
| 357.19671 | 207134192.0 | 100.00   | 357.19614  | 0.57        | 13.5       | C <sub>24</sub> H <sub>25</sub> ON <sub>2</sub> |

<sup>1</sup>H NMR (500 MHz, CDCl<sub>3</sub>): (Table S1, 3f)

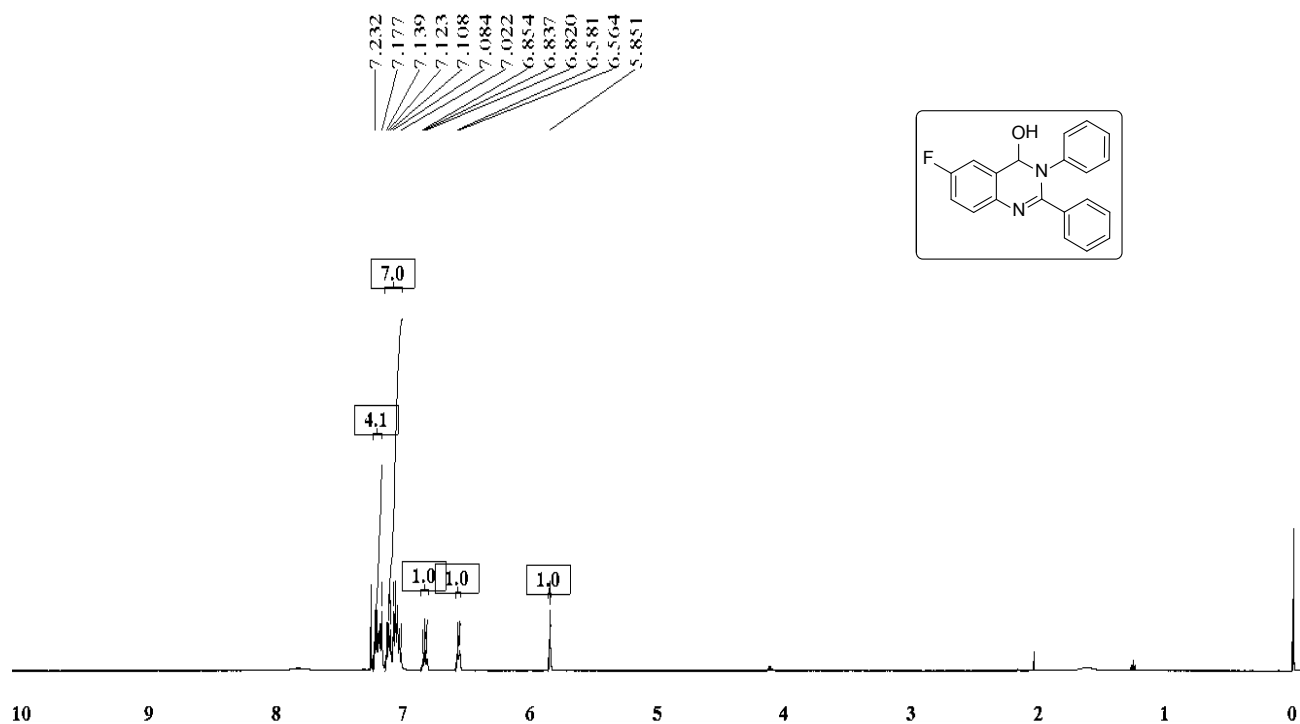

<sup>13</sup>C NMR (125 MHz, CDCl<sub>3</sub>): (Table S1, 3f)

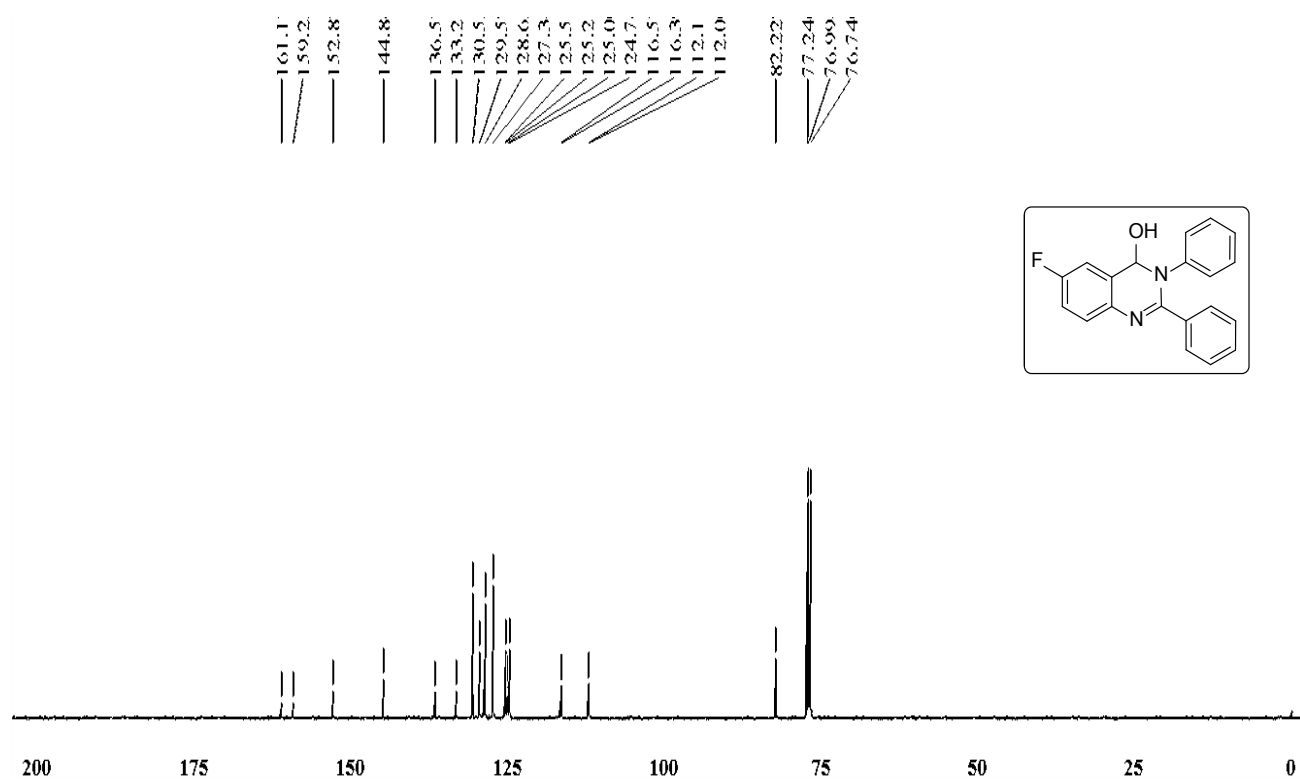

HIGH RESOLUTION MASS SPECTRA: (Table S1, 3f)

File Name CAICT-HRMS\...KRR-3-89  
Sample Name  
Sample ID G SAIDULU  
Date and Time 08-09-14 23:14:29

KRR-3-89#6-89 RT: 0.02-0.30 AV: 84 SB: 326 0.80-1.90 NL: 1.78E8  
T: FTMS {1,1} + p ESI Full ms [100.00-2000.00]

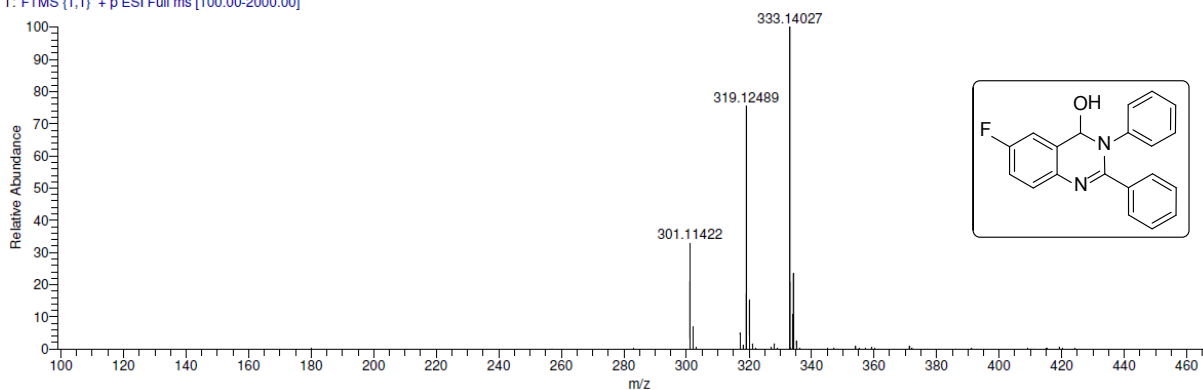

KRR-3-89#8-30 RT: 0.03-0.10 AV: 23  
T: FTMS {1,1} + p ESI Full ms [100.00-2000.00]  
m/z= 312.96-322.34

| m/z       | Intensity   | Relative | Theo. Mass | Delta (ppm) | RDB equiv. | Composition                                                     |
|-----------|-------------|----------|------------|-------------|------------|-----------------------------------------------------------------|
| 319.12477 | 163107584.0 | 100.00   | 319.12412  | 0.66        | 13.5       | C <sub>20</sub> H <sub>16</sub> O <sub>2</sub> N <sub>2</sub> F |

<sup>1</sup>H NMR (500 MHz, CDCl<sub>3</sub>): (Table S1, 3g)

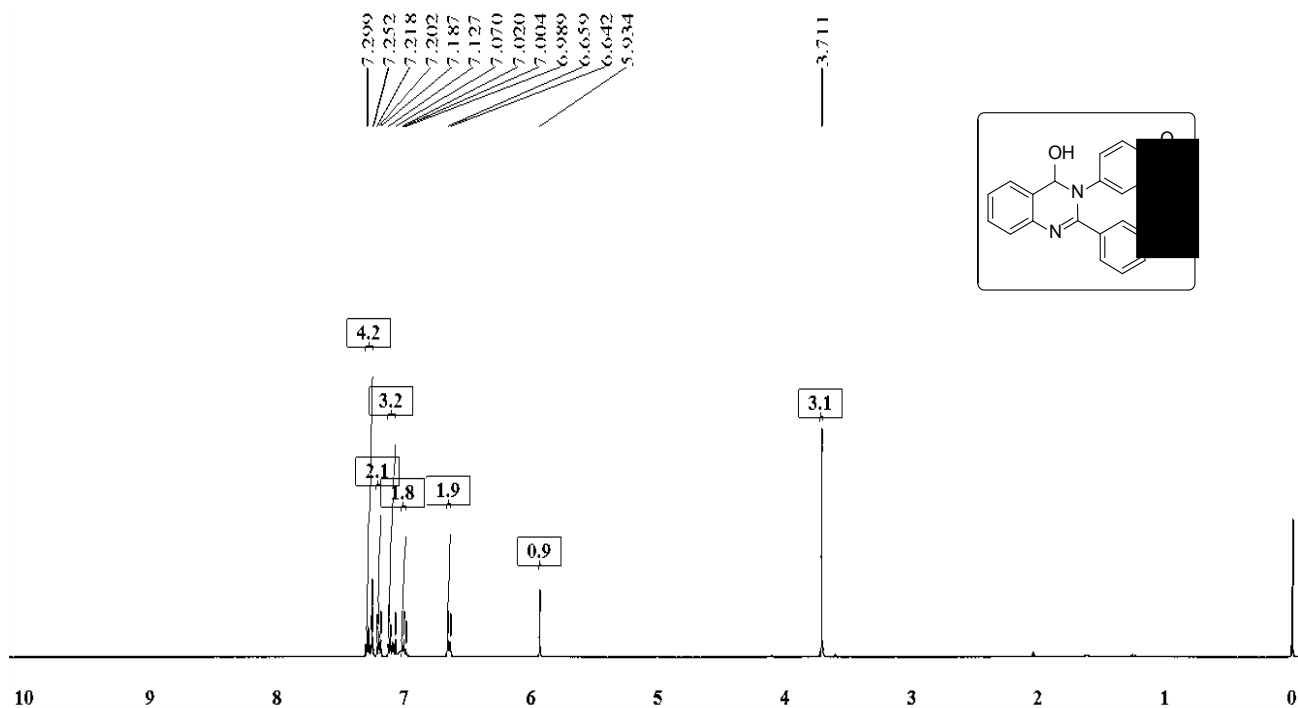

<sup>13</sup>C NMR (125 MHz, CDCl<sub>3</sub>): (Table S1, 3g)

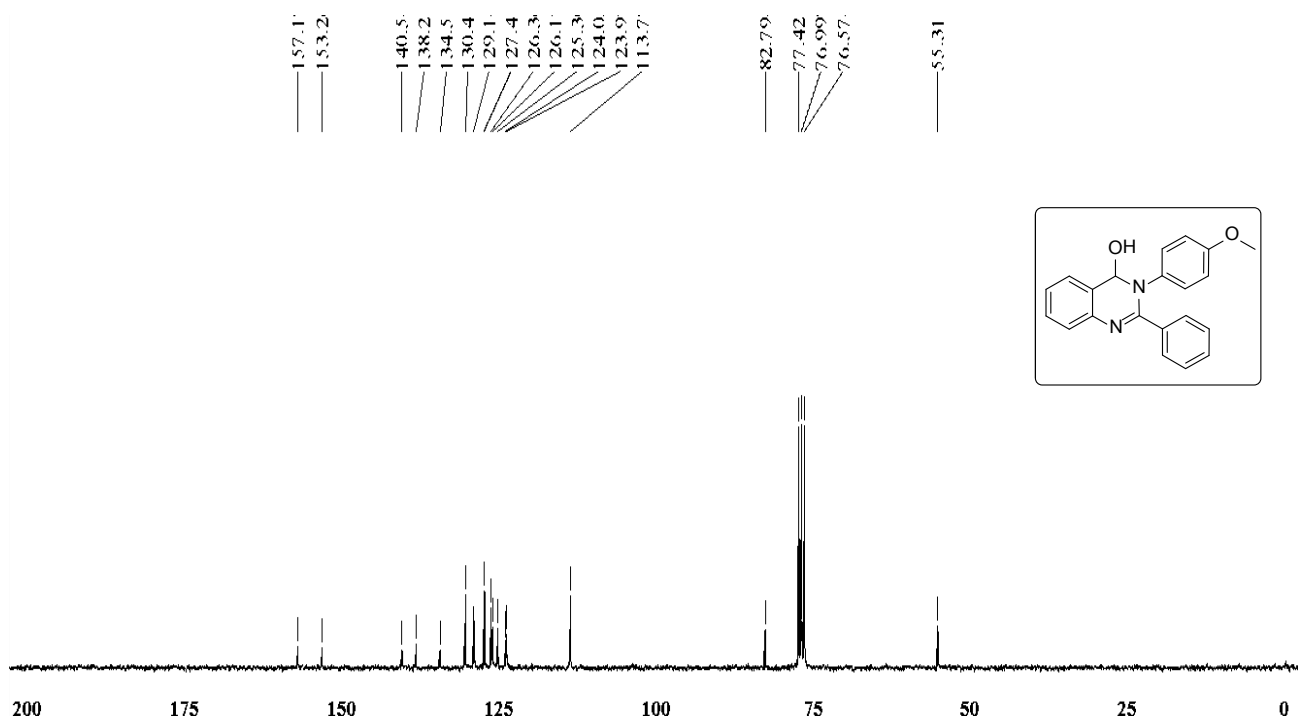

HIGH RESOLUTION MASS SPECTRA: (Table S1, 3g)



File Name CAICT-HRMS...KRR-3-93

Sample Name

Sample ID G SAIDULU

Date and Time 08-09-14 23:17:10

<KRR-3-93 #6-89 RT: 0.02-0.30 AV: 84 SB: 326 0.80-1.90 NL: 9.72E7  
I: FTMS (1,1) + p ESI Full ms [100.00-2000.00]

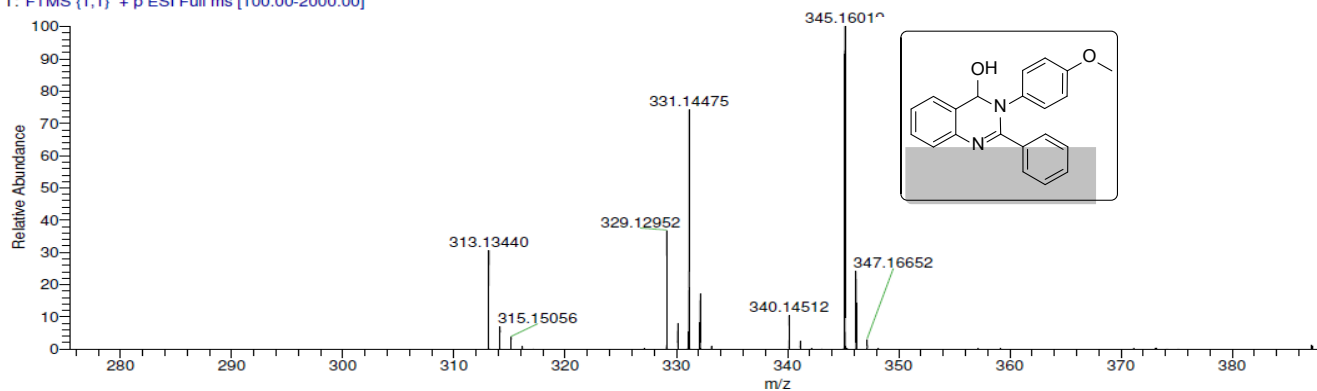

KRR-3-93#8-30 RT: 0.03-0.10 AV: 23  
I: FTMS (1,1) + p ESI Full ms [100.00-2000.00]

| m/z       | Intensity  | Relative | Theo. Mass | Delta (ppm) | RDB equiv. | Composition                                                   |
|-----------|------------|----------|------------|-------------|------------|---------------------------------------------------------------|
| 331.14466 | 93258624.0 | 100.00   | 331.14410  | 0.55        | 13.5       | C <sub>21</sub> H <sub>19</sub> O <sub>2</sub> N <sub>2</sub> |

**<sup>1</sup>H NMR (300 MHz, DMSO-d<sub>6</sub>): (Table 2, 5a)**

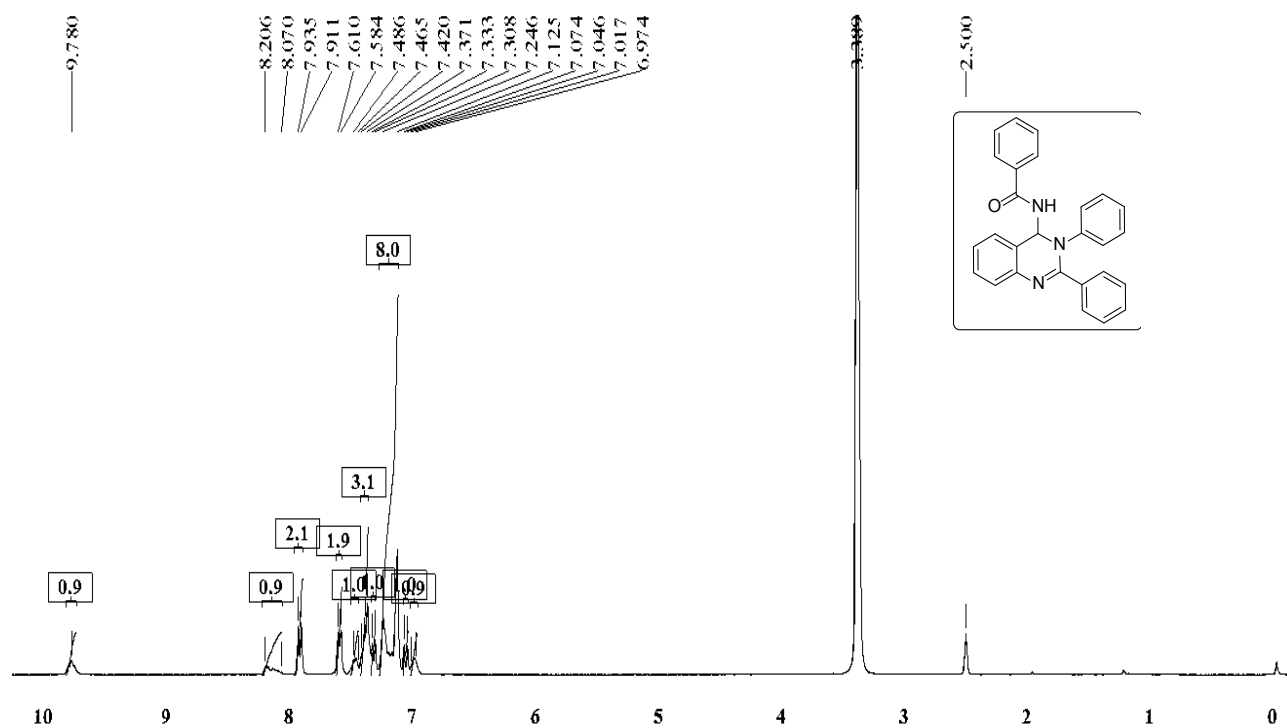

**<sup>13</sup>C NMR (75 MHz, DMSO-d<sub>6</sub>): (Table 2, 5a)**

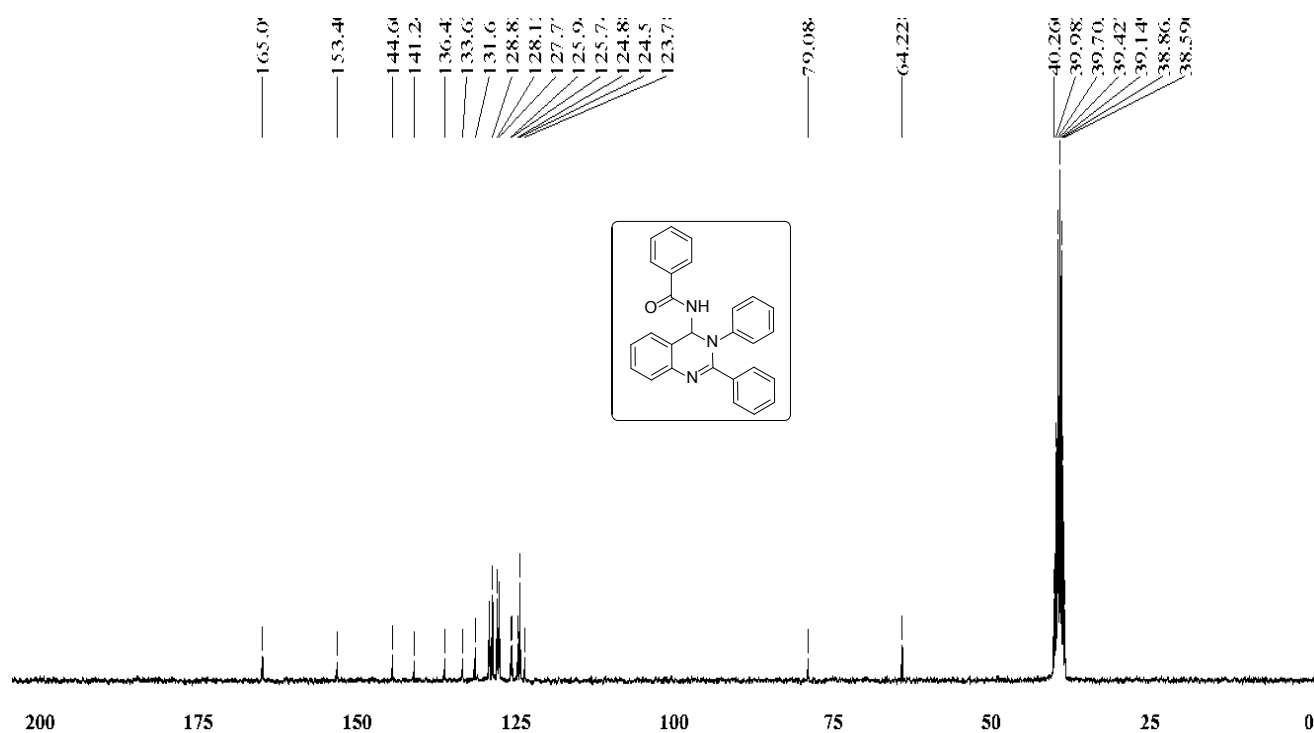

# HIGH RESOLUTION MASS SPECTRA: (Table 2, 5a)

National Centre for Mass Spectrometry  
CSIR-Indian Institute of Chemical Technology

File Name C:\IICT-HRMS-31.12.2013\KRR-SAI-64

Sample Name

Sample ID G-SAIDULU

Date and Time 01-01-14 01:50:59

KRR-SAI-64#1-64 RT: 0.01-0.34 AV: 94 NL: 224E2

T: FTMS (1.1) + p ESI Full ms [100.00-2000.00]

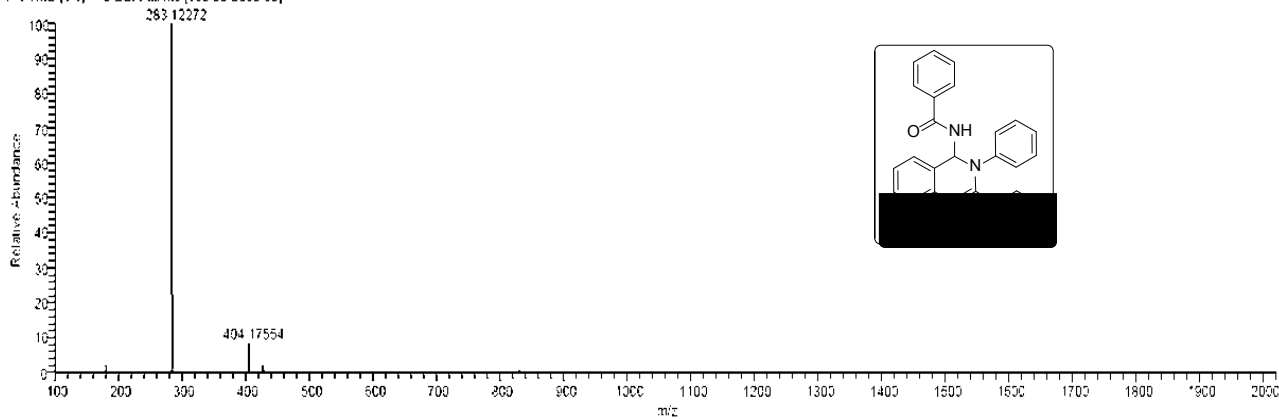

KRR-SAI-64#8-30 RT: 0.05-0.12 AV: 23

T: FTMS (1.1) + p ESI Full ms [100.00-2000.00]

m/z = 362.84-434.80

| m/z       | Intensity  | Relative | Theo. Mass | Delta (ppm) | RDB equiv. | Composition                                        |
|-----------|------------|----------|------------|-------------|------------|----------------------------------------------------|
| 404.17551 | 34625132.0 | 100.00   | 404.17574  | -0.56       | 18.5       | C <sub>27</sub> H <sub>22</sub> ON <sub>2</sub>    |
| 426.15787 | 12725434.0 | 36.75    | 426.15768  | 0.43        | 18.5       | C <sub>27</sub> H <sub>21</sub> ON <sub>2</sub> Na |

**<sup>1</sup>H NMR (500 MHz, CDCl<sub>3</sub> + DMSO-d<sub>6</sub>): (Table 2, 5b)**

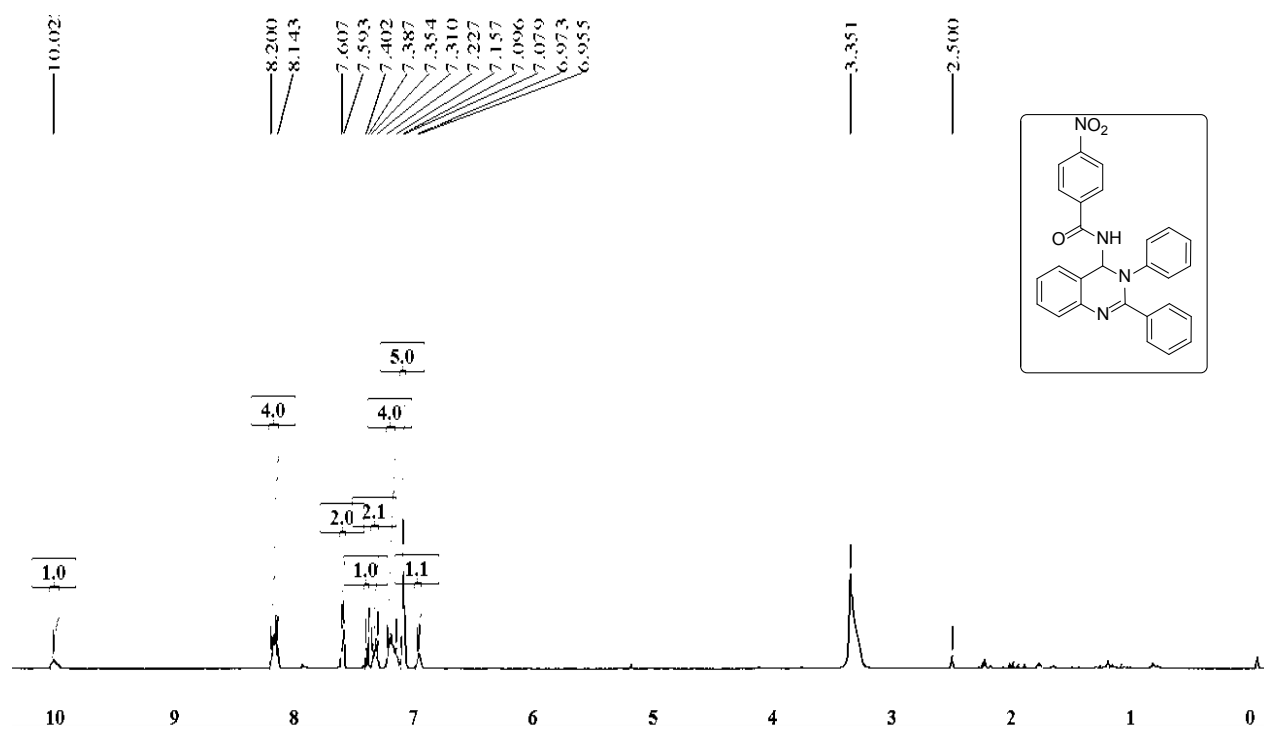

**<sup>13</sup>C NMR (125 MHz, CDCl<sub>3</sub> + DMSO-d<sub>6</sub>): (Table 2, 5b)**

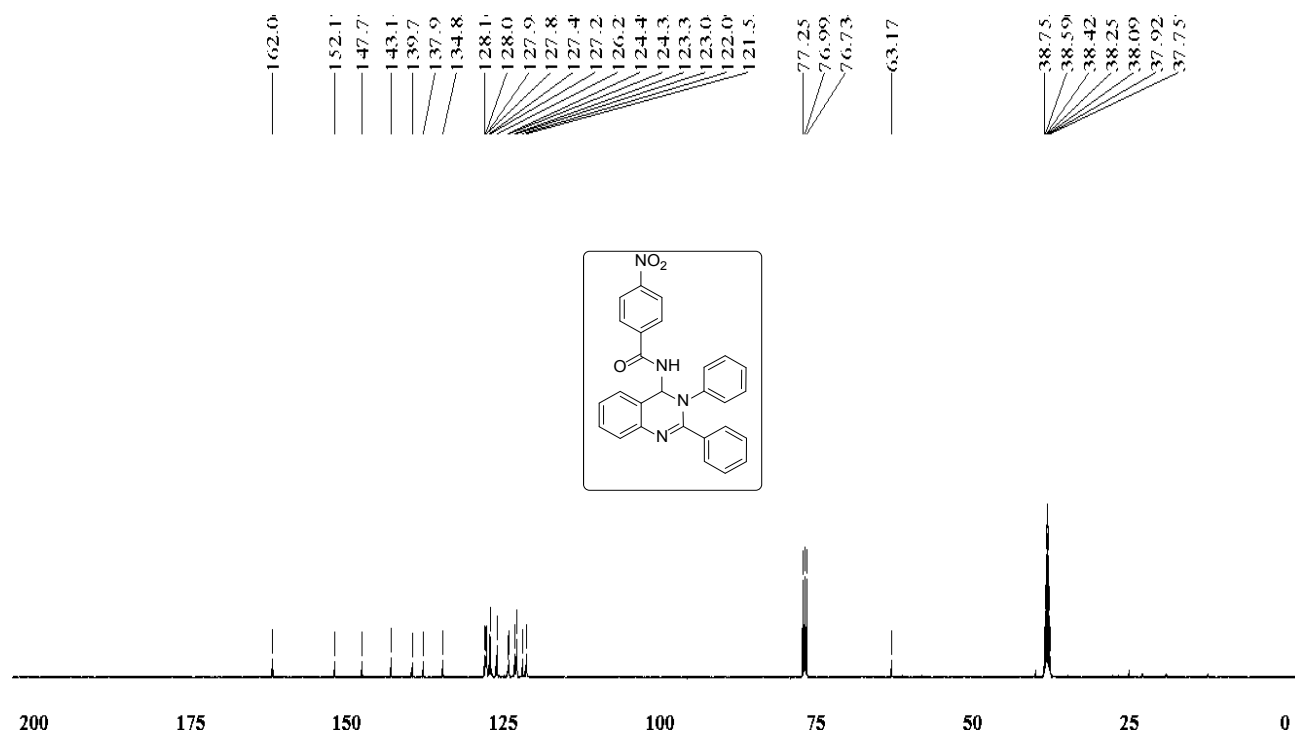

# HIGH RESOLUTION MASS SPECTRA: (Table 2, 5b)

National Centre for Mass Spectrometry  
CSIR-Indian Institute of Chemical Technology

File Name C:\ICT-HRMS-31.12.2013\KRR-SAI-4NBA

Sample Name

Sample ID G-SAIDULU

Date and Time 01-01-14 02:43:30

KRR-SAI-4NBA#4-100 RT: 0.01-0.34 AV: 97 NL: 1.28E8

T: FTMS (1,1) + p ESI Full ms (100.00-2000.00)

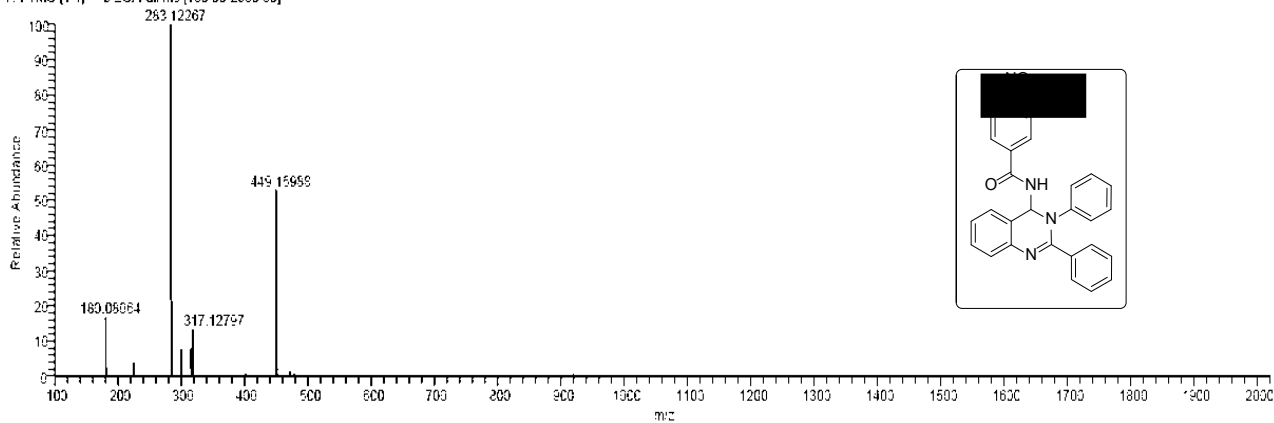

KRR-SAI-4NBA#8-30 RT: 0.03-0.10 AV: 23

T: FTMS (1,1) + p ESI Full ms (100.00-2000.00)

m/z= 417.12-476.46

| m/z       | Intensity  | Relative | Theo. Mass | Delta | RDB    | Composition                                                   |
|-----------|------------|----------|------------|-------|--------|---------------------------------------------------------------|
|           |            |          |            | (ppm) | equiv. |                                                               |
| 449.15990 | 62629820.0 | 100.00   | 449.16082  | -2.04 | 19.5   | C <sub>27</sub> H <sub>21</sub> O <sub>3</sub> N <sub>4</sub> |
| 450.16379 | 17995474.0 | 28.73    |            |       |        |                                                               |

<sup>1</sup>H NMR (300 MHz, CDCl<sub>3</sub> + DMSO-d<sub>6</sub>): (Table 2, 5c)

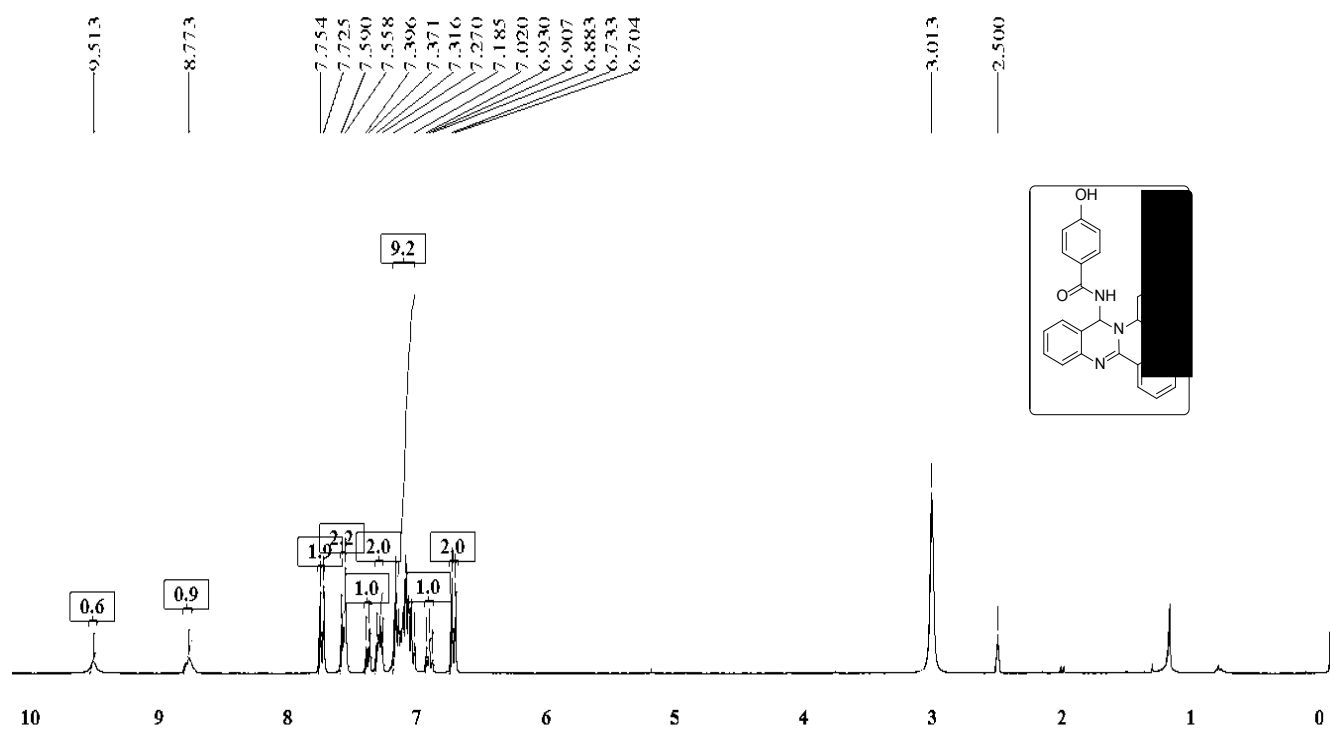

<sup>13</sup>C NMR (125 MHz, CDCl<sub>3</sub> + DMSO-d<sub>6</sub>): (Table 2, 5c)

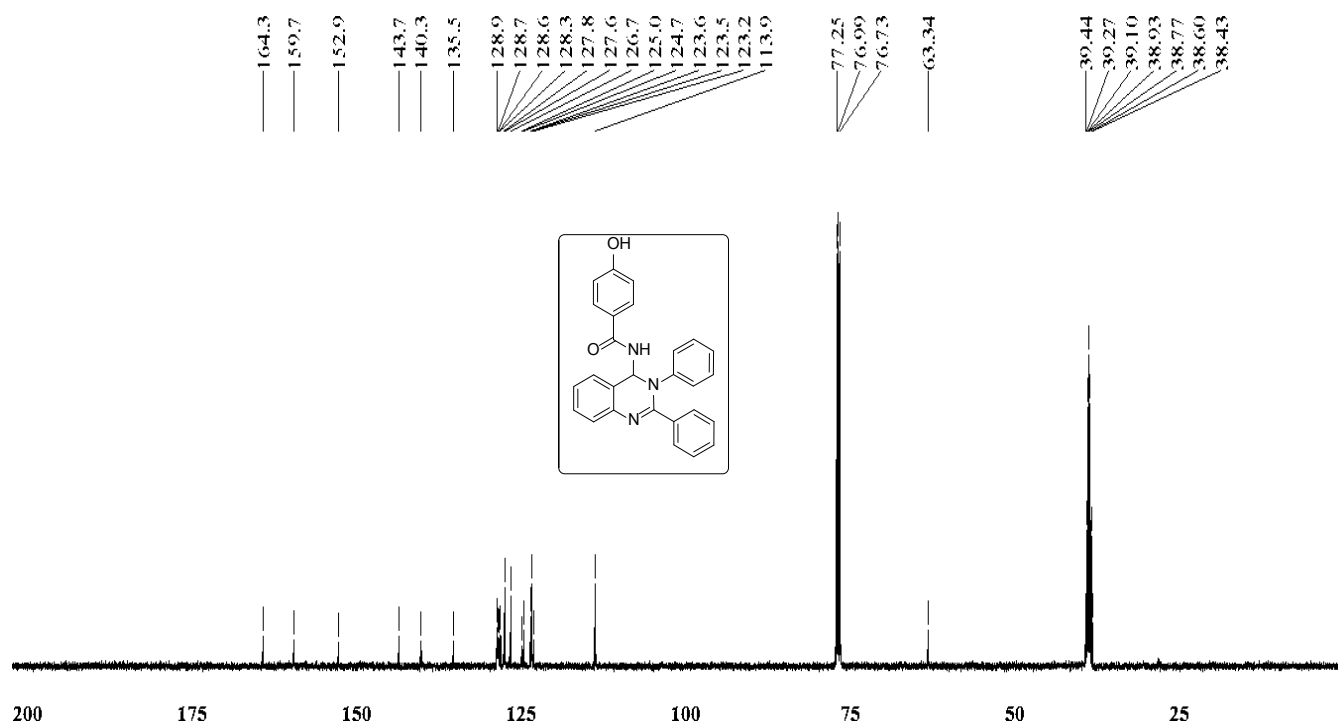

# HIGH RESOLUTION MASS SPECTRA: (Table 2, 5c)

National Centre for Mass Spectrometry  
CSIR-Indian Institute of Chemical Technology

File Name C:\ICT-HRMS-31.12.2013 KRR-SAI-68

Sample Name

Sample ID G-SAIDULU

Date and Time 01-01-14 02:01:29

KRR-SAI-68 #2-64 RT: 0.05-0.12 AV: 23 NL: 131E2

T: FTMS (1,1) + p ESI Full ms (100.00-2000.00)

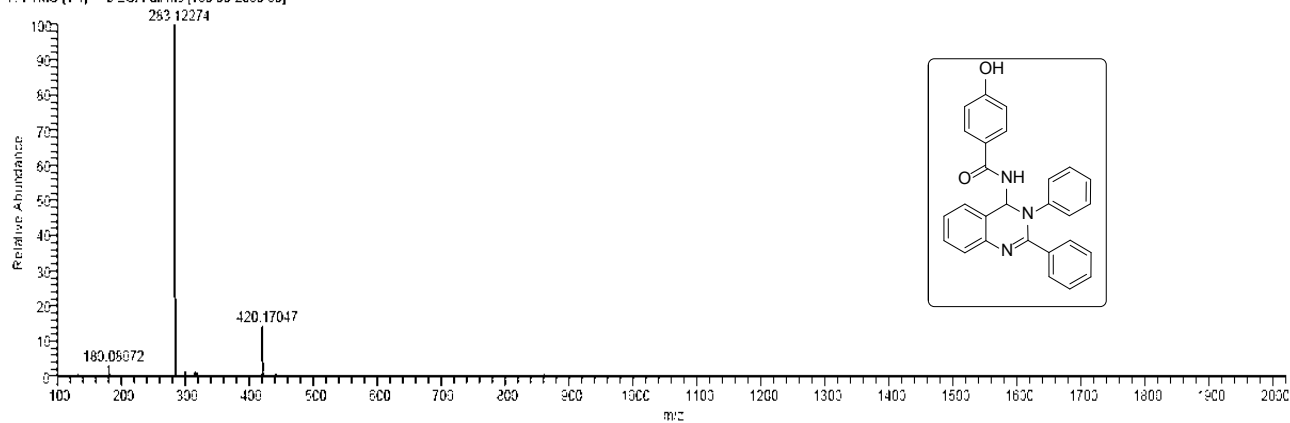

KRR-SAI-68#8-30 RT: 0.05-0.12 AV: 23

T: FTMS (1,1) + p ESI Full ms (100.00-2000.00)

m/z= 400.71-447.42

| m/z       | Intensity  | Relative | Theo. Mass | Delta | RDB    | Composition                                                   |
|-----------|------------|----------|------------|-------|--------|---------------------------------------------------------------|
|           |            |          |            | (ppm) | equiv. |                                                               |
| 420.17042 | 41431880.0 | 100.00   | 420.17065  | -0.56 | 18.5   | C <sub>27</sub> H <sub>22</sub> O <sub>2</sub> N <sub>3</sub> |
| 421.17397 | 11544743.0 | 27.86    |            |       |        |                                                               |

**<sup>1</sup>H NMR (300 MHz, CDCl<sub>3</sub>): (Table 2, 5d)**

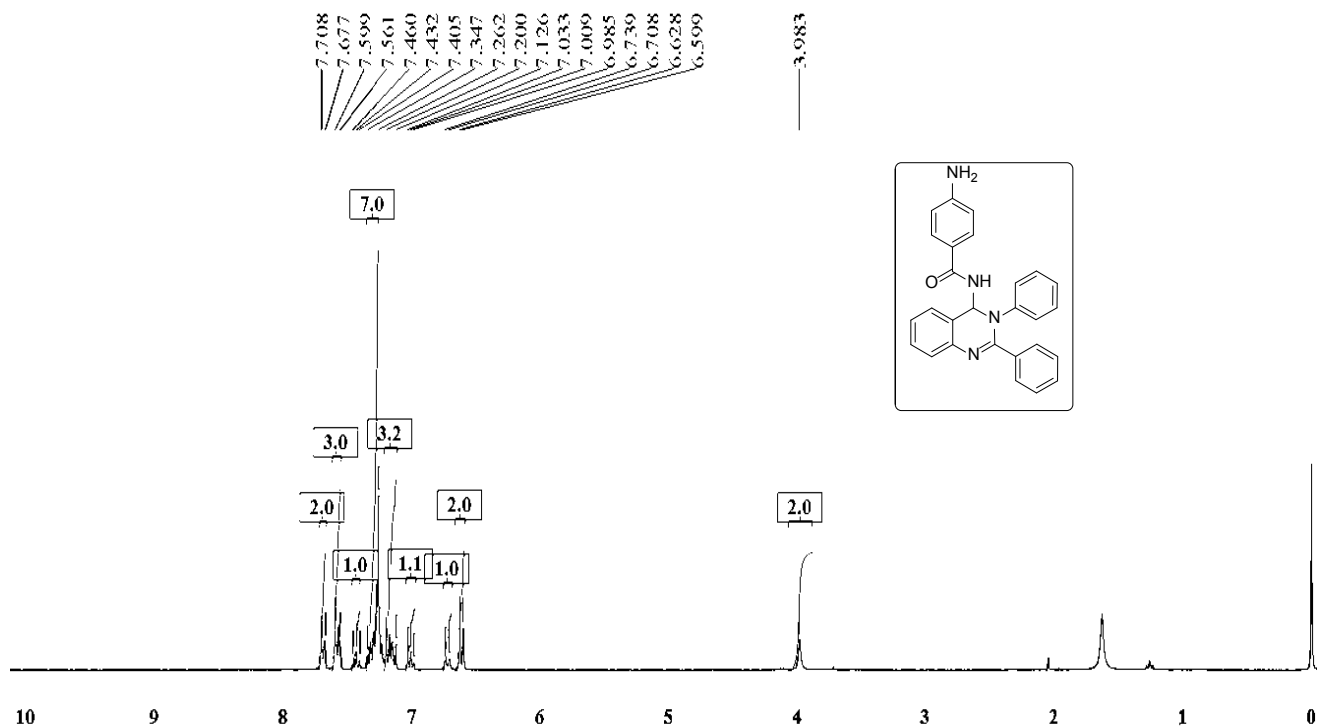

**<sup>13</sup>C NMR (125 MHz, CDCl<sub>3</sub>): (Table 2, 5d)**

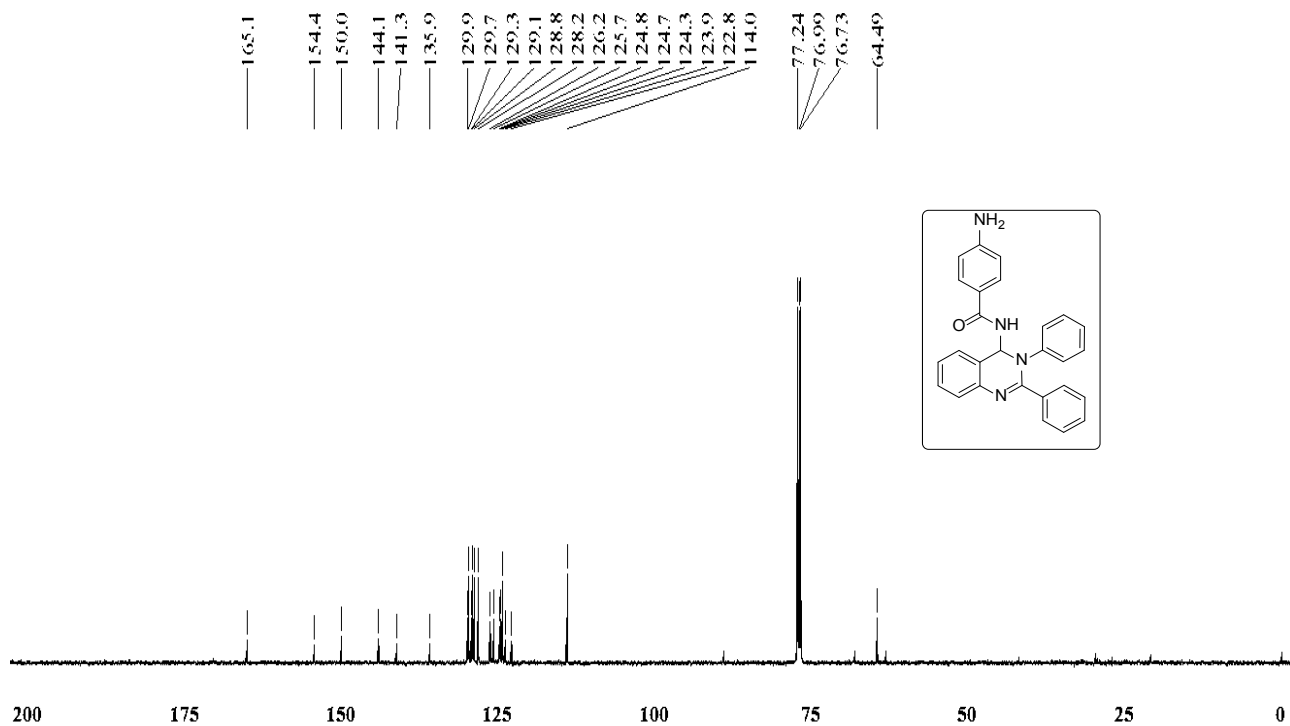



# HIGH RESOLUTION MASS SPECTRA: (Table 2, 5d)

National Centre for Mass Spectrometry  
CSIR-Indian Institute of Chemical Technology

File Name C:\IICT-HRMS\31\_12\_2013\KRR-SAI-69

Sample Name

Sample ID G-SAIDULU

Date and Time 01-01-14 02:04:09

KRR-SAI-69#1-93 RT: 0.01-0.34 AV: 93 INL: 2.56E8

T: FTMS (1.1) + p ESI Full ms [100.00-2000.00]

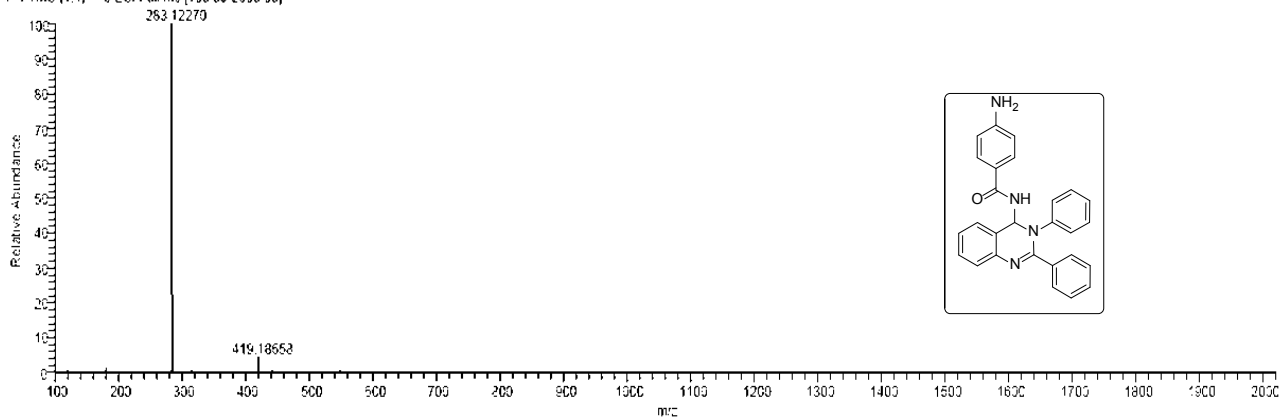

KRR-SAI-69#8-30 RT: 0.05-0.12 AV: 23

T: FTMS (1.1) + p ESI Full ms [100.00-2000.00]

m/z = 377.99-467.62

| m/z       | Intensity  | Relative | Theo. Mass | Delta | RDB    | Composition                                     |
|-----------|------------|----------|------------|-------|--------|-------------------------------------------------|
|           |            |          |            | (ppm) | equiv. |                                                 |
| 419.18677 | 18091240.0 | 100.00   | 419.18664  | 0.32  | 18.5   | C <sub>27</sub> H <sub>23</sub> ON <sub>4</sub> |
| 420.19018 | 5141609.5  | 28.42    |            |       |        |                                                 |

**<sup>1</sup>H NMR (300 MHz, CDCl<sub>3</sub>): (Table 2, 5e)**

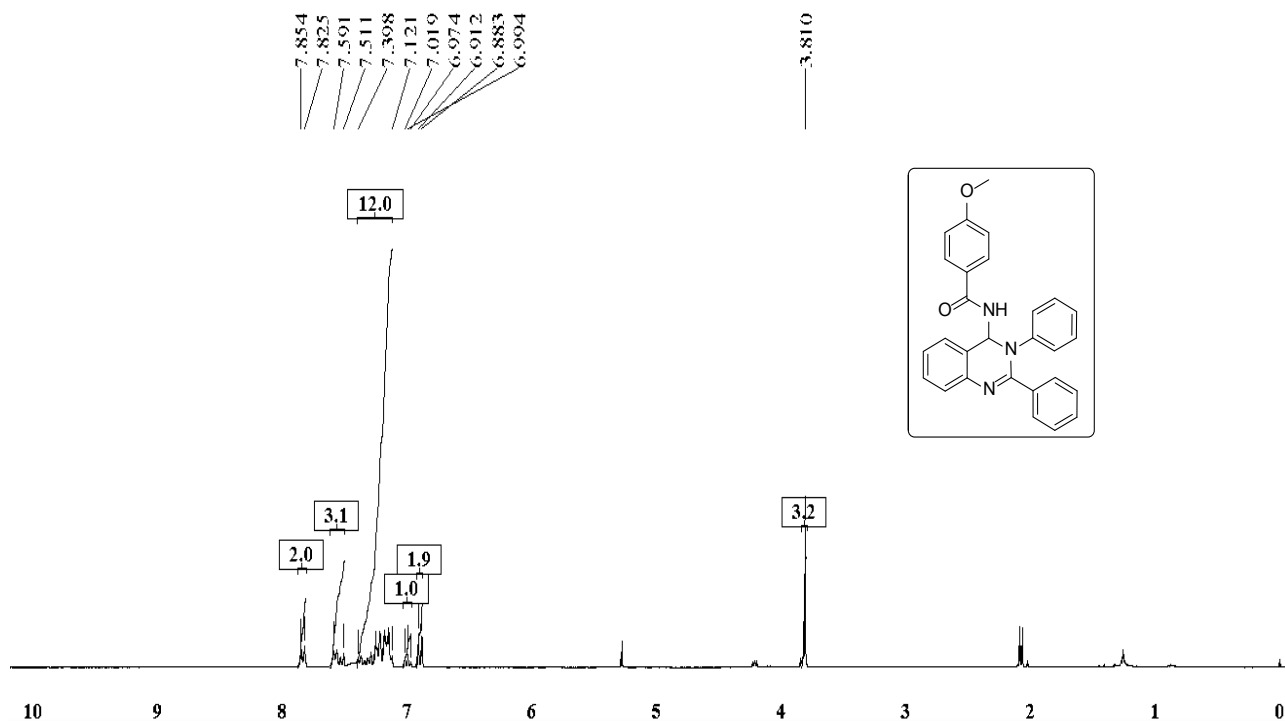

**<sup>13</sup>C NMR (125 MHz, CDCl<sub>3</sub>): (Table 2, 5e)**

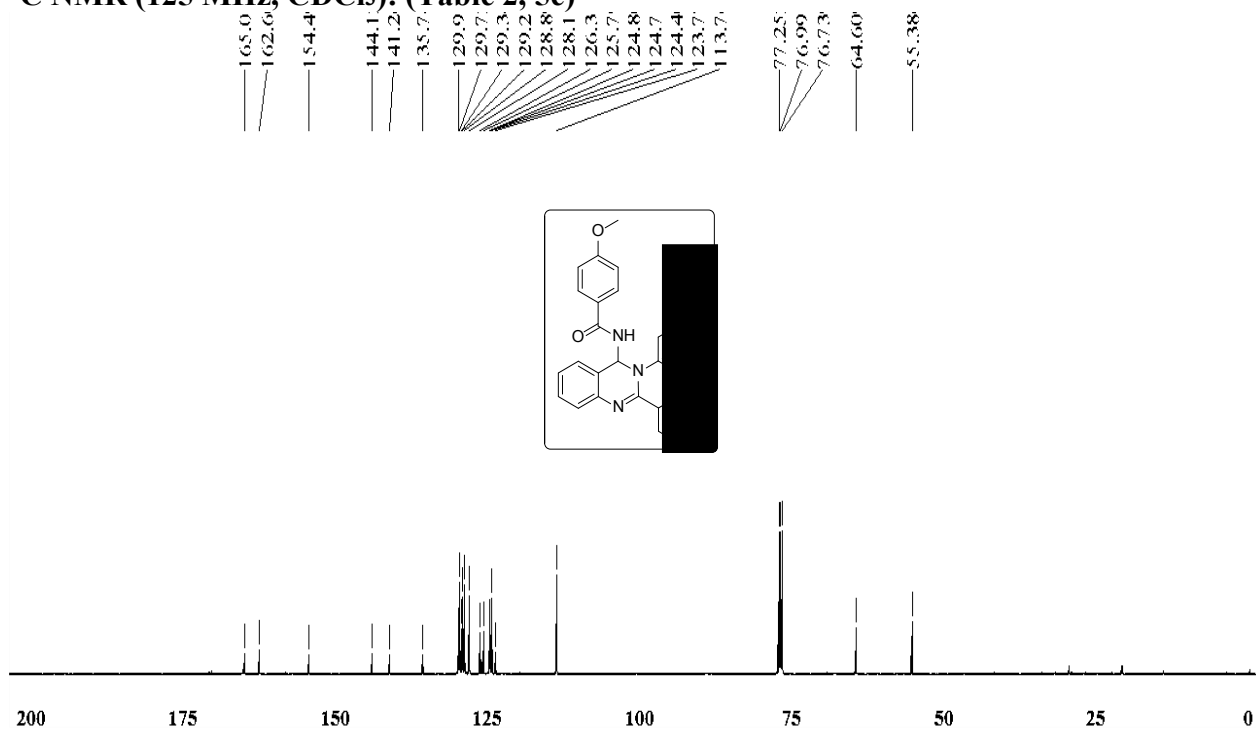

# HIGH RESOLUTION MASS SPECTRA: (Table 2, 5e)

National Centre for Mass Spectrometry  
CSIR-Indian Institute of Chemical Technology

File Name CNICT-HRMS:31.12.2013:KRR-SAI-66  
Sample Name  
Sample ID G-SAIDULU  
Date and Time 01-01-14 01:56:21

KRR-SAI-66#2-56 RT: 0.01-0.34 AV: 95 NL: 1.95E3  
F: FTMS (1.1) + p ESI Full ms [100.00-2000.00]

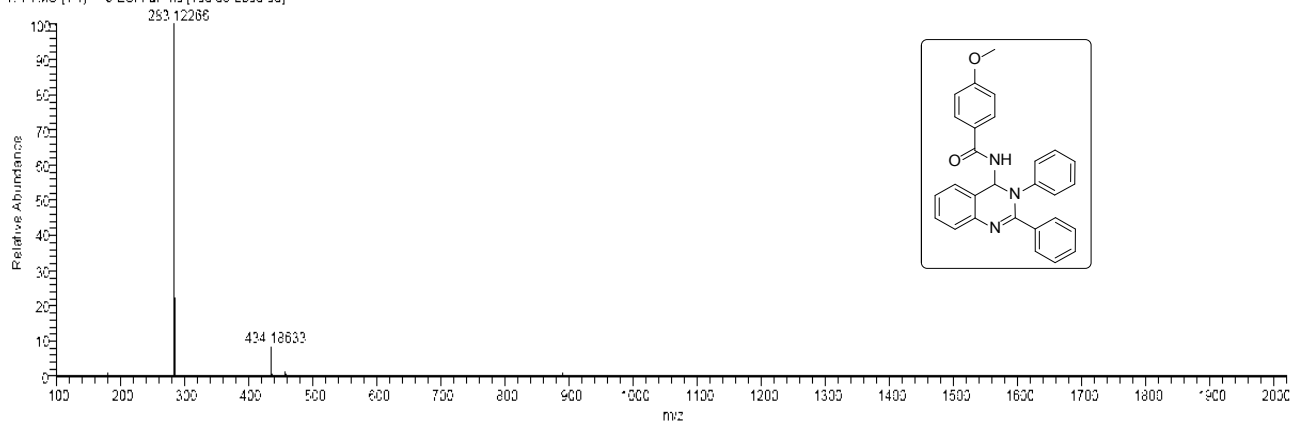

KRR-SAI-66#8-30 RT: 0.04-0.11 AV: 23  
F: FTMS (1.1) + p ESI Full ms [100.00-2000.00]  
m/z= 412.08-453.73

| m/z       | Intensity  | Relative | Theo. Mass | Delta | RDB    | Composition                                                      |
|-----------|------------|----------|------------|-------|--------|------------------------------------------------------------------|
|           |            |          |            | (ppm) | equiv. |                                                                  |
| 434.18623 | 33117368.0 | 100.00   | 434.18630  | -0.17 | 18.5   | C <sub>28</sub> H <sub>24</sub> O <sub>2</sub> N <sub>3</sub>    |
| 435.18966 | 9972754.0  | 30.11    | 435.19172  | -4.74 | 15.0   | C <sub>26</sub> H <sub>26</sub> O <sub>2</sub> N <sub>3</sub> Na |

<sup>1</sup>H NMR (500 MHz, CDCl<sub>3</sub>): (Table 2, 5f)

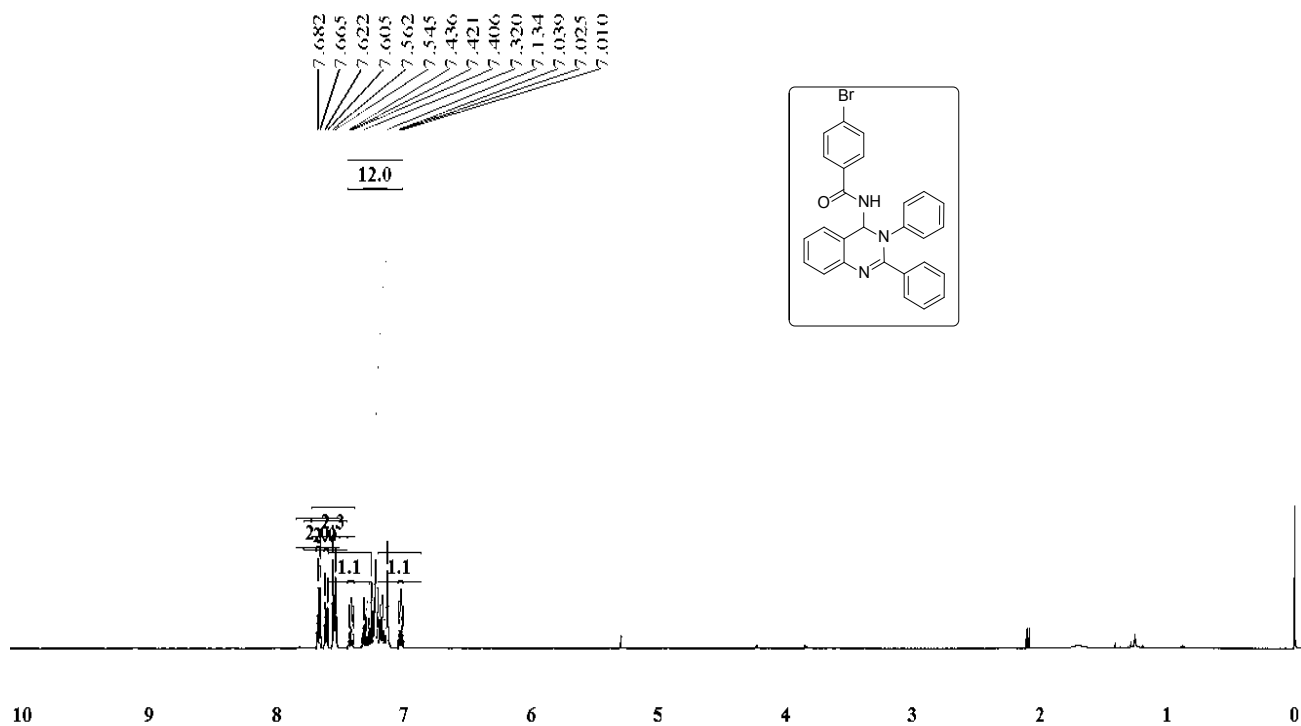

<sup>13</sup>C NMR (125 MHz, CDCl<sub>3</sub>): (Table 2, 5f)

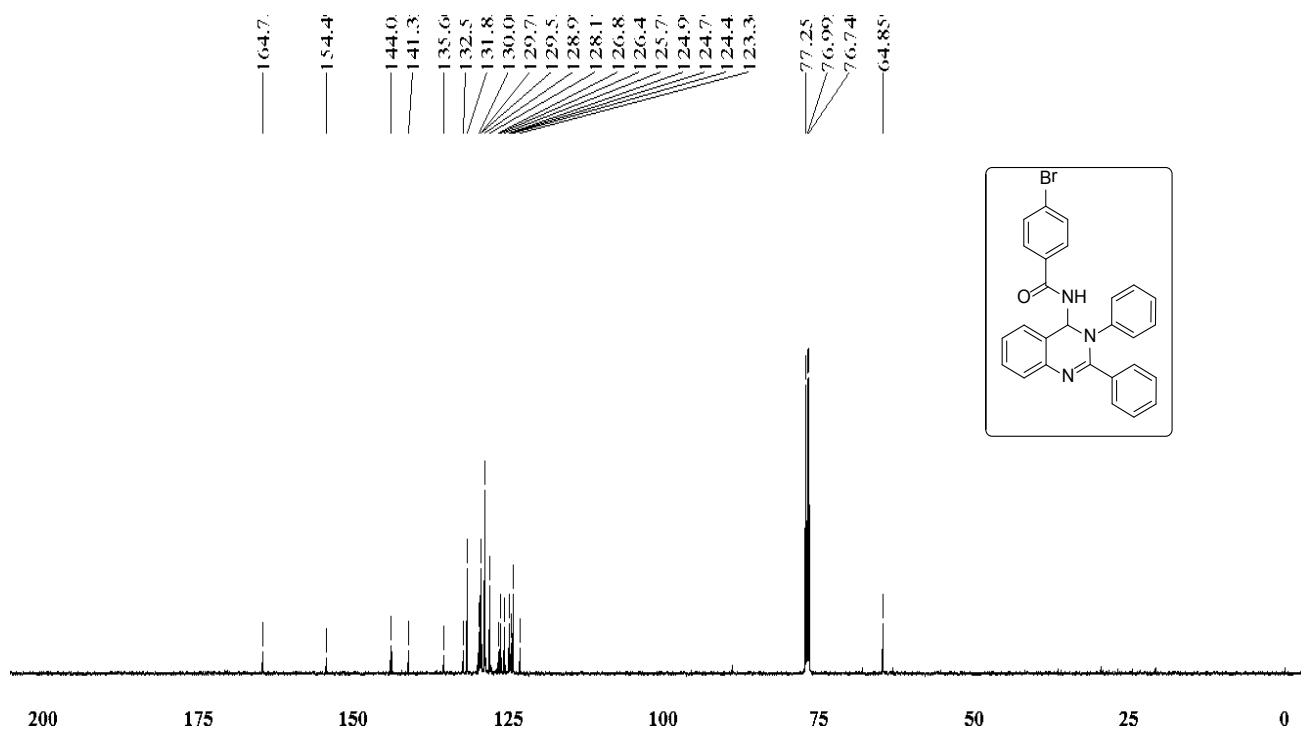

# HIGH RESOLUTION MASS SPECTRA: (Table 2, 5f)

National Centre for Mass Spectrometry  
 CSIR-Indian Institute of Chemical Technology

File Name C:\IIC-T-HRMS-31.12.2013\KRR-SAI-67

Sample Name

Sample ID G-SAIDULU

Date and Time 01-01-14 01:58:53

KRR-SAI-67 #2-94 RT: 0.01-0.34 AV: 93 NL: 185E3

T: FTMS (1.1) + p ESI Full ms [130.00-2000.00]

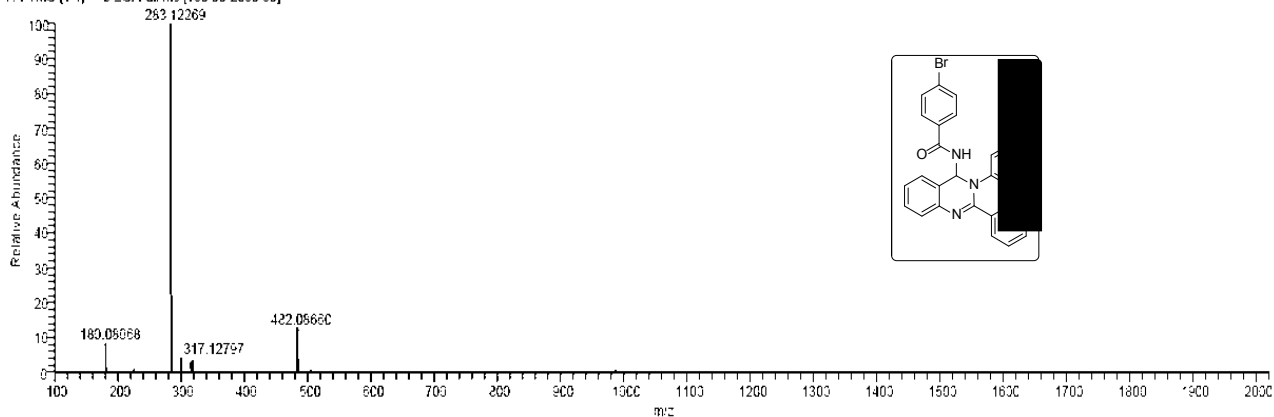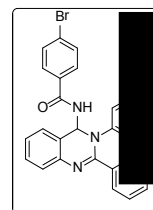

KRR-SAI-67#8-30 RT: 0.05-0.12 AV: 23

T: FTMS (1.1) + p ESI Full ms [100.00-2000.00]

m/z = 452.47-518.11

| m/z       | Intensity  | Relative | Theo. Mass | Delta (ppm) | RDB equiv. | Composition                                         |
|-----------|------------|----------|------------|-------------|------------|-----------------------------------------------------|
| 482.08659 | 36968744.0 | 100.00   | 482.08625  | 0.71        | 18.5       | C <sub>27</sub> H <sub>21</sub> O <sub>3</sub> Br   |
|           |            |          | 482.08519  | 2.92        | 15.0       | C <sub>27</sub> H <sub>24</sub> O <sub>2</sub> BrNa |

<sup>1</sup>H NMR (400 MHz, CDCl<sub>3</sub> + DMSO-d<sub>6</sub>): (Table 2, 5g)

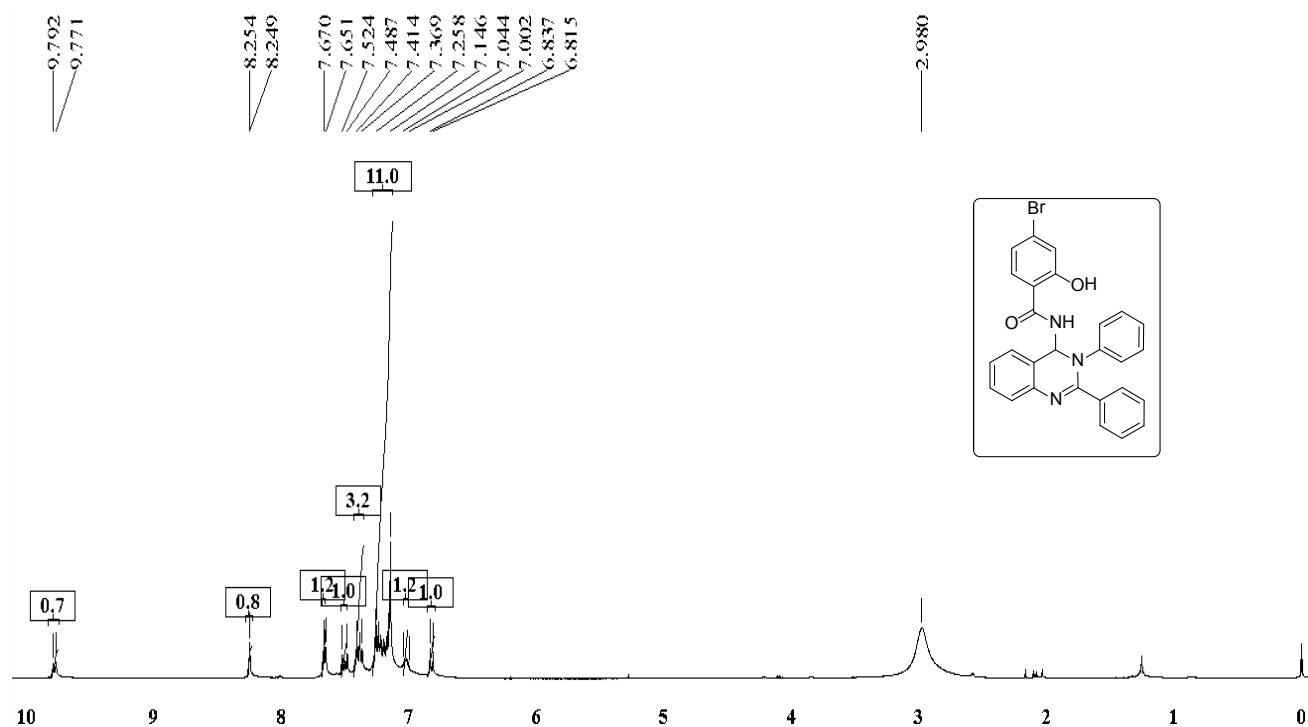

<sup>13</sup>C NMR (125 MHz, CDCl<sub>3</sub> + DMSO-d<sub>6</sub>): (Table 2, 5g)

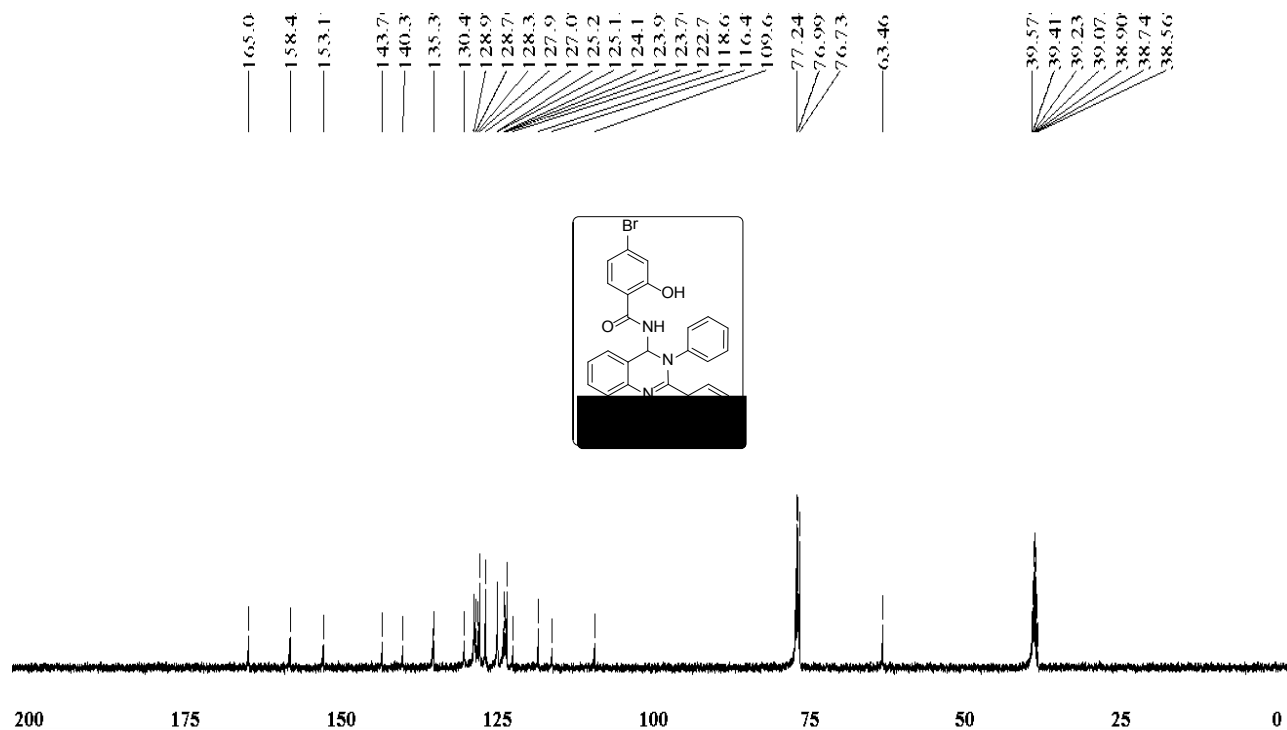

# HIGH RESOLUTION MASS SPECTRA: (Table 2, 5g)

National Centre for Mass Spectrometry

KRR-SAI-71#2-84 RT: 0.01-0.34 AV: 93 NL: 944E7  
T: FTMS (1,1) + p ESI Full ms [100.00-2000.00]

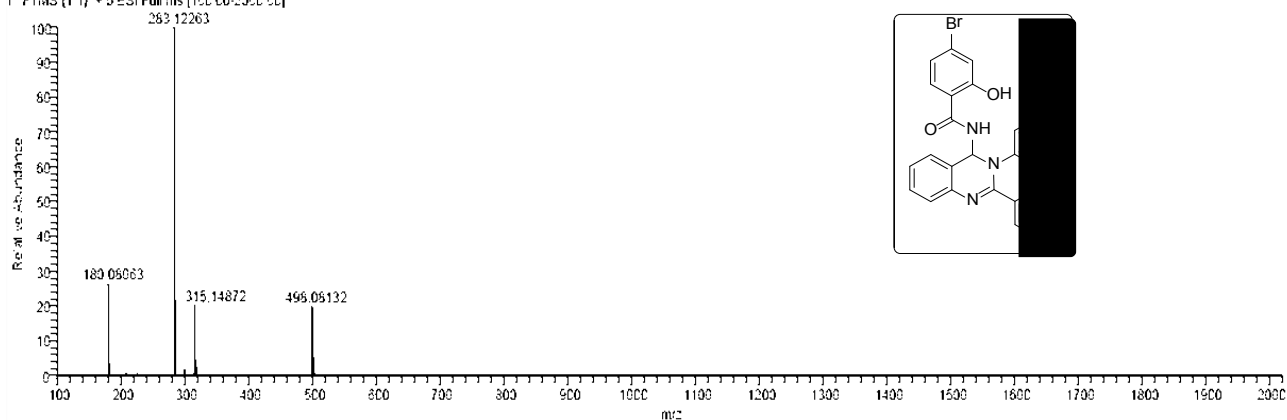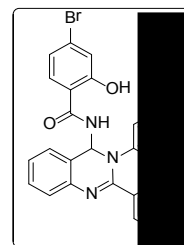

KRR-SAI-71#8-30 RT: 0.05-0.12 AV: 23

T: FTMS (1,1) + p ESI Full ms [100.00-2000.00]

m/z = 472.67-514.33

| m/z       | Intensity  | Relative | Theo. Mass | Delta | RDB    | Composition                                                      |
|-----------|------------|----------|------------|-------|--------|------------------------------------------------------------------|
|           |            |          |            | (ppm) | equiv. |                                                                  |
| 498.08135 | 36953036.0 | 100.00   | 498.08117  | 0.37  | 18.5   | C <sub>27</sub> H <sub>21</sub> O <sub>2</sub> N <sub>3</sub> Br |
| 500.07938 | 36720308.0 | 99.37    |            |       |        |                                                                  |

**<sup>1</sup>H NMR (300 MHz, CDCl<sub>3</sub>): (Table 2, 5h)**

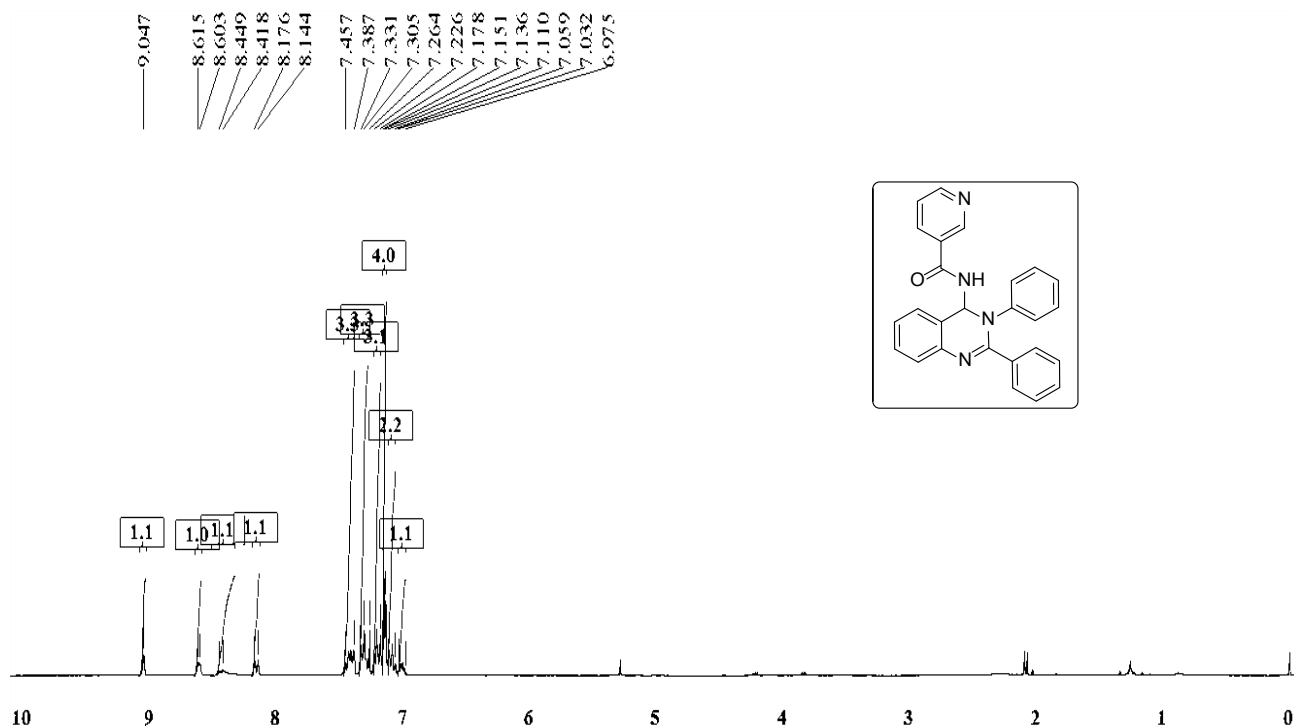

**<sup>13</sup>C NMR (75 MHz, CDCl<sub>3</sub>): (Table 2, 5h)**

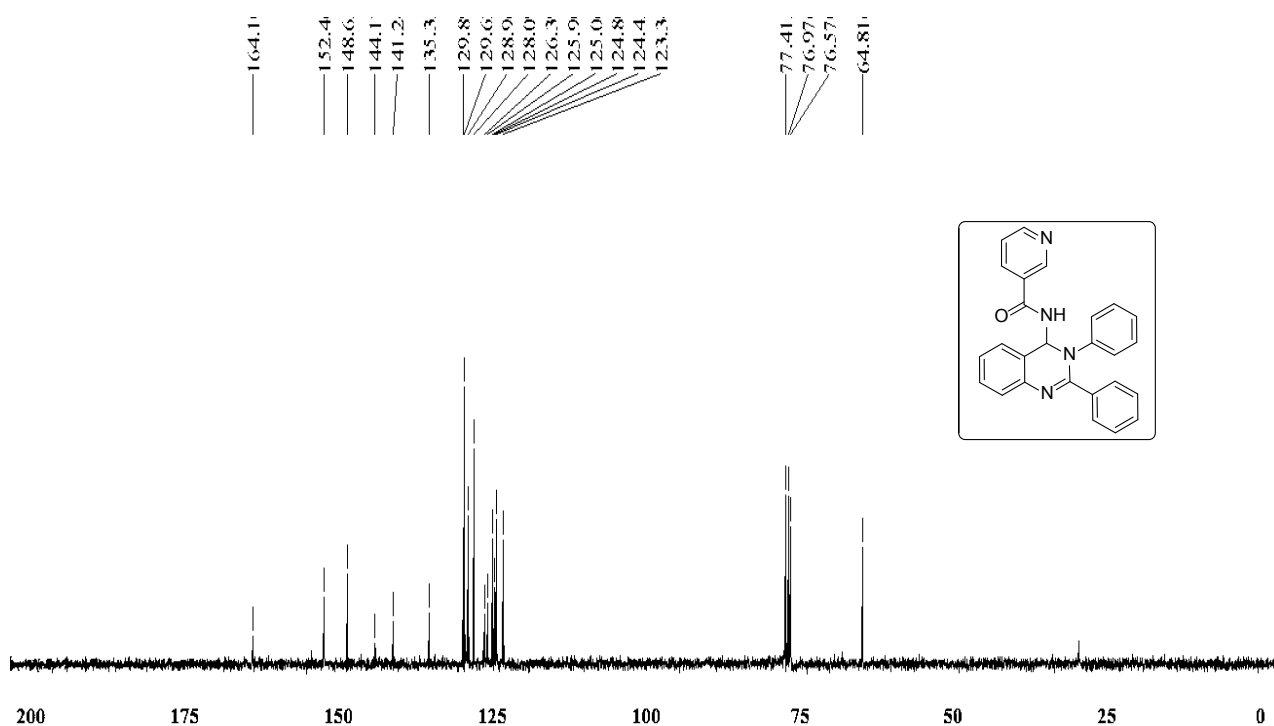



# HIGH RESOLUTION MASS SPECTRA: (Table 2, 5h)

National Centre for Mass Spectrometry  
CSIR-Indian Institute of Chemical Technology

File Name C:\IICT-HRMS\31.12.2013 KRR-SAI-65

Sample Name

Sample ID G-SAIDULU

Date and Time 01-01-14 01:53:40

KRR-SAI-65#2-96 RT: 0.01-0.34 AV: 95 NL: 175E3

T: FTMS (1.1) + p ESI Full ms [100.00-2000.00]

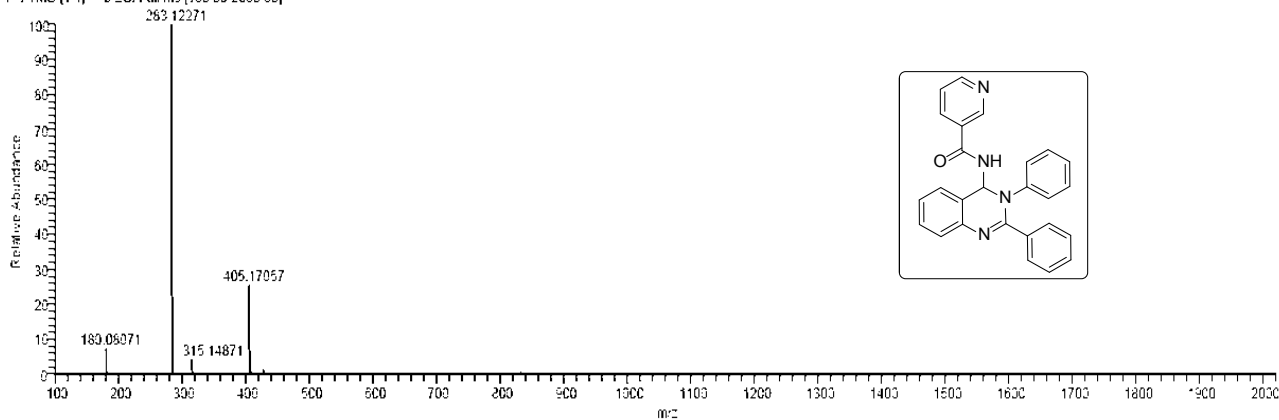

KRR-SAI-65#8-30 RT: 0.04-0.12 AV: 23

T: FTMS (1.1) + p ESI Full ms [100.00-2000.00]

m/z = 374.20-429.75

| m/z       | Intensity  | Relative | Theo. Mass | Delta | RDB    | Composition                                     |
|-----------|------------|----------|------------|-------|--------|-------------------------------------------------|
|           |            |          |            | (ppm) | equiv. |                                                 |
| 405.17055 | 65943060.0 | 100.00   | 405.17099  | -1.08 | 18.5   | C <sub>26</sub> H <sub>21</sub> ON <sub>4</sub> |
| 406.17381 | 17320384.0 | 26.27    |            |       |        |                                                 |

**<sup>1</sup>H NMR (300 MHz, CDCl<sub>3</sub>): (Table 2, 5i)**

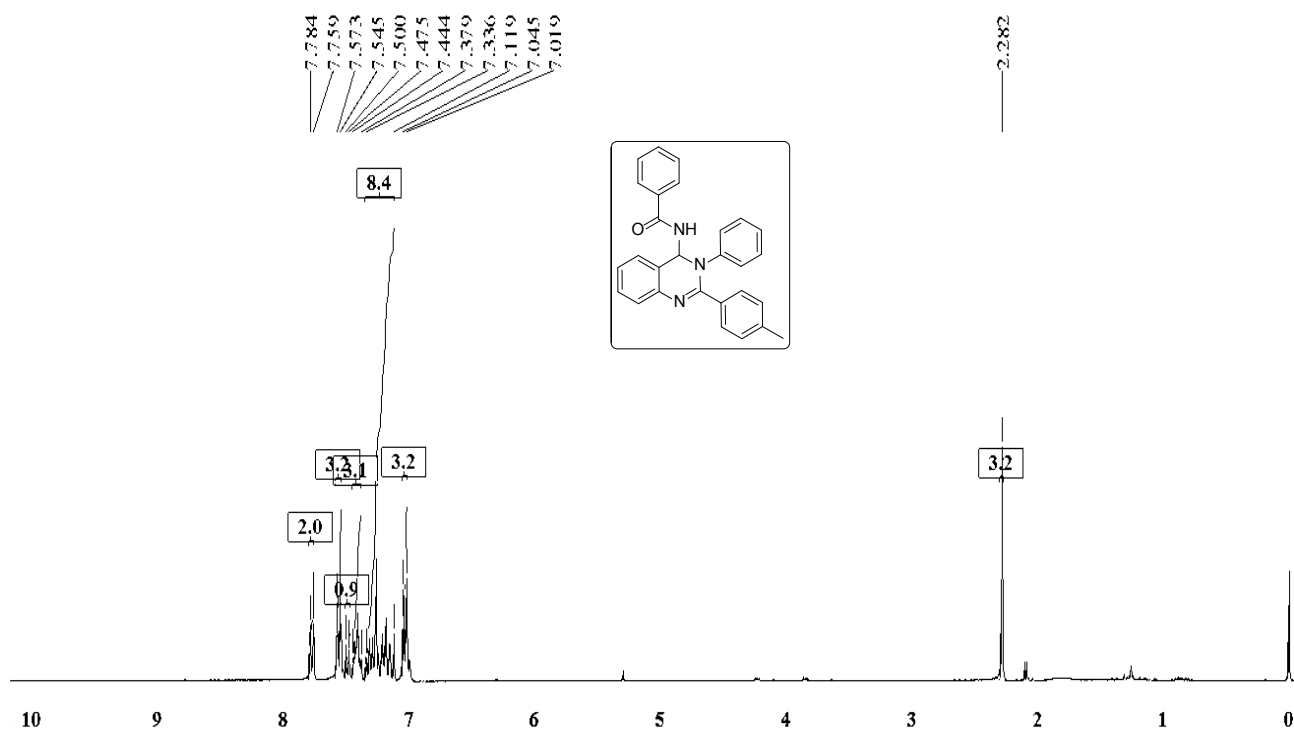

**<sup>13</sup>C NMR (125 MHz, CDCl<sub>3</sub>): (Table 2, 5i)**

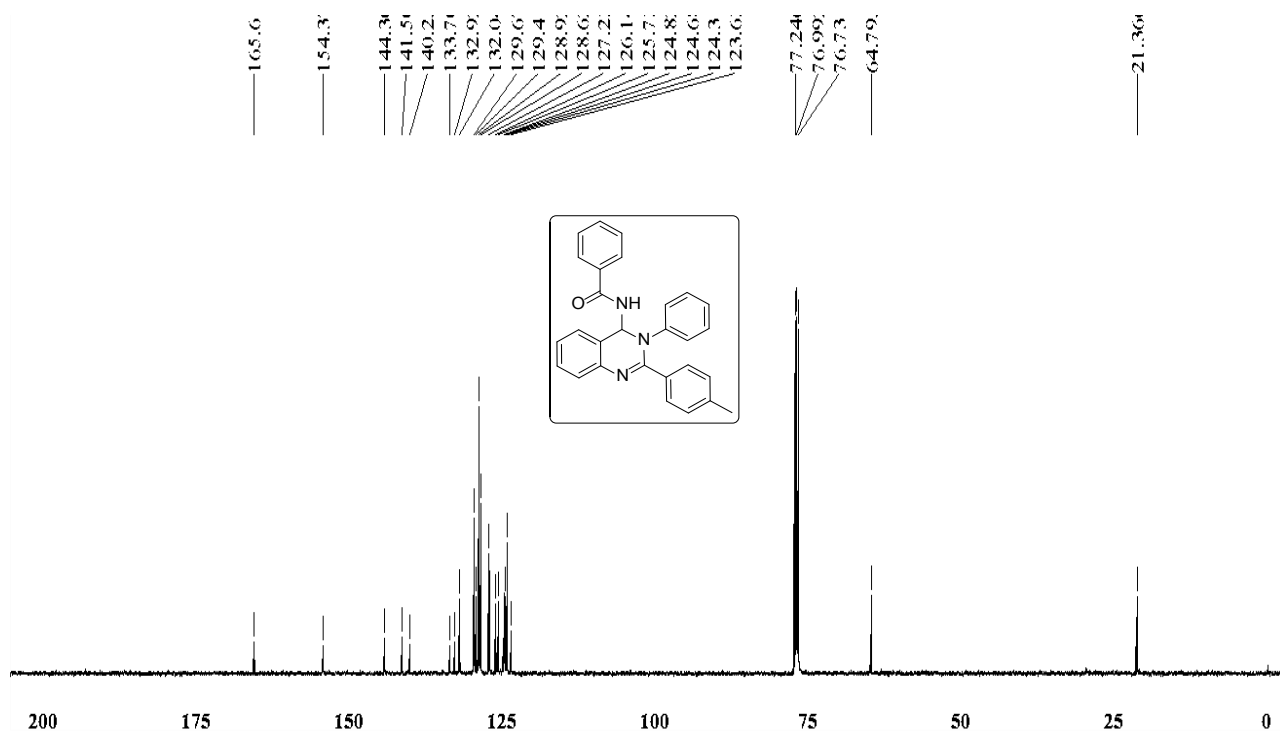

# HIGH RESOLUTION MASS SPECTRA: (Table 2, 5i)

National Centre for Mass Spectrometry

KRR-SAI-73#2-97 RT: 0.01-0.34 AV: 98 NL: 2.61E3  
 T: FTMS (1,1) + p ESI Full ms (100.00-2000.00)

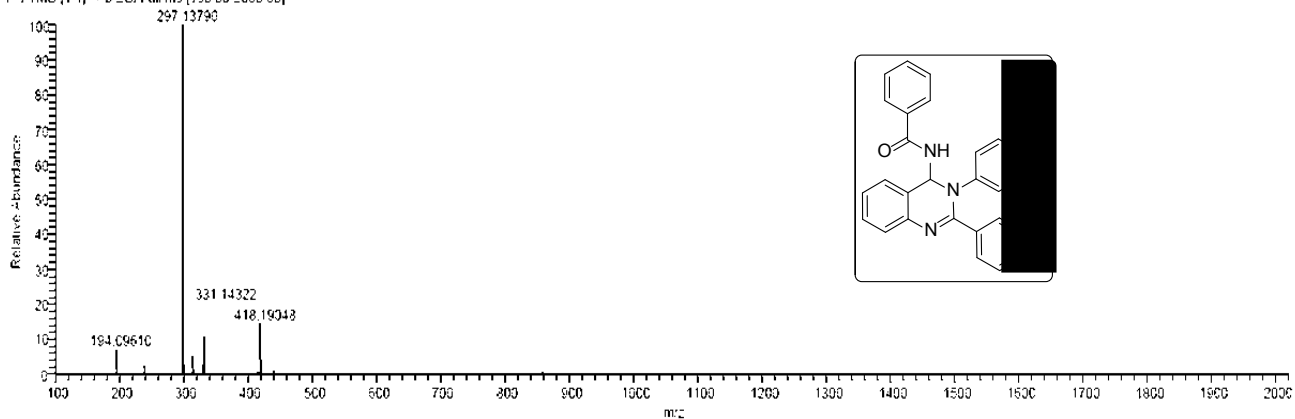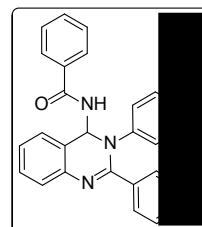

KRR-SAI-73#8-30 RT: 0.04-0.11 AV: 23  
 T: FTMS (1,1) + p ESI Full ms (100.00-2000.00)  
 m/z = 381.78-444.90

| m/z       | Intensity  | Relative | Theo. Mass | Delta (ppm) | RDB equiv. | Composition                                       |
|-----------|------------|----------|------------|-------------|------------|---------------------------------------------------|
| 418.19039 | 47566736.0 | 100.00   | 418.19033  | 0.16        | 15.0       | C <sub>28</sub> H <sub>27</sub> O <sub>2</sub> Na |
| 418.19139 |            |          | 418.19139  | -2.38       | 18.5       | C <sub>28</sub> H <sub>24</sub> ON <sub>3</sub>   |

<sup>1</sup>H NMR (500 MHz, CDCl<sub>3</sub>): (Table 2, 5j)

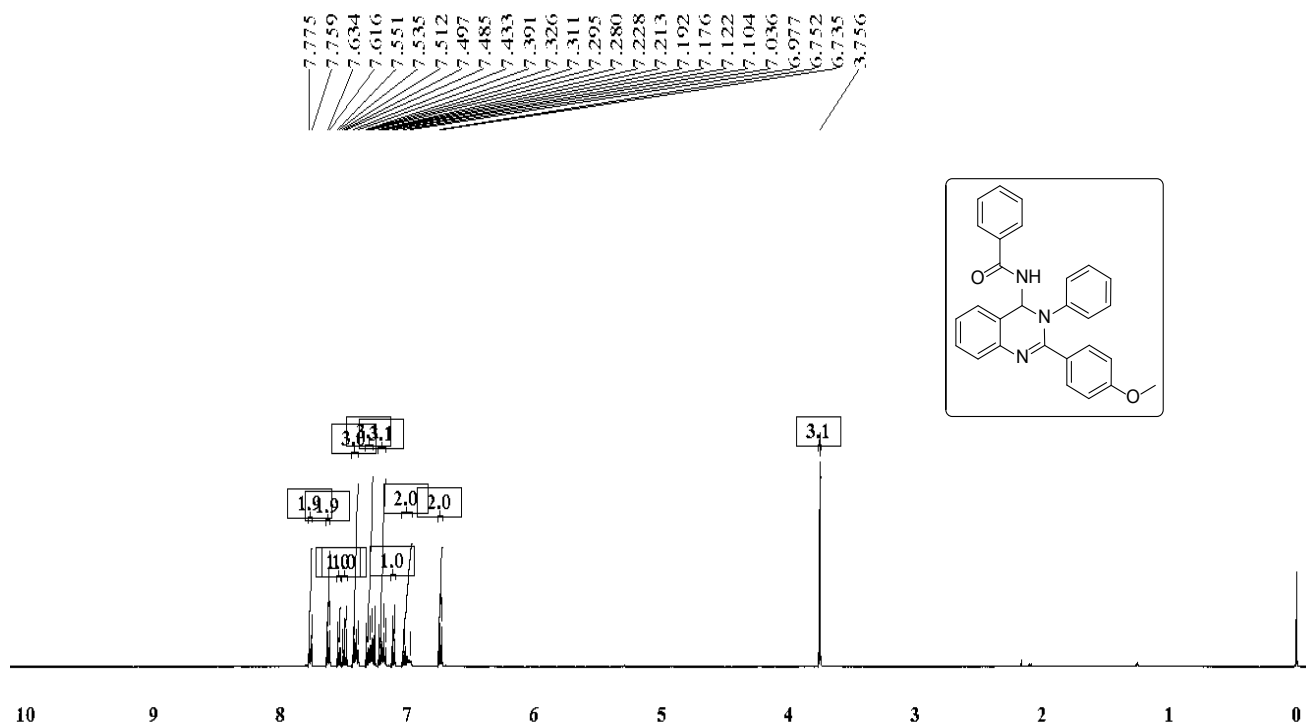

<sup>13</sup>C NMR (75 MHz, CDCl<sub>3</sub>): (Table 2, 5j)

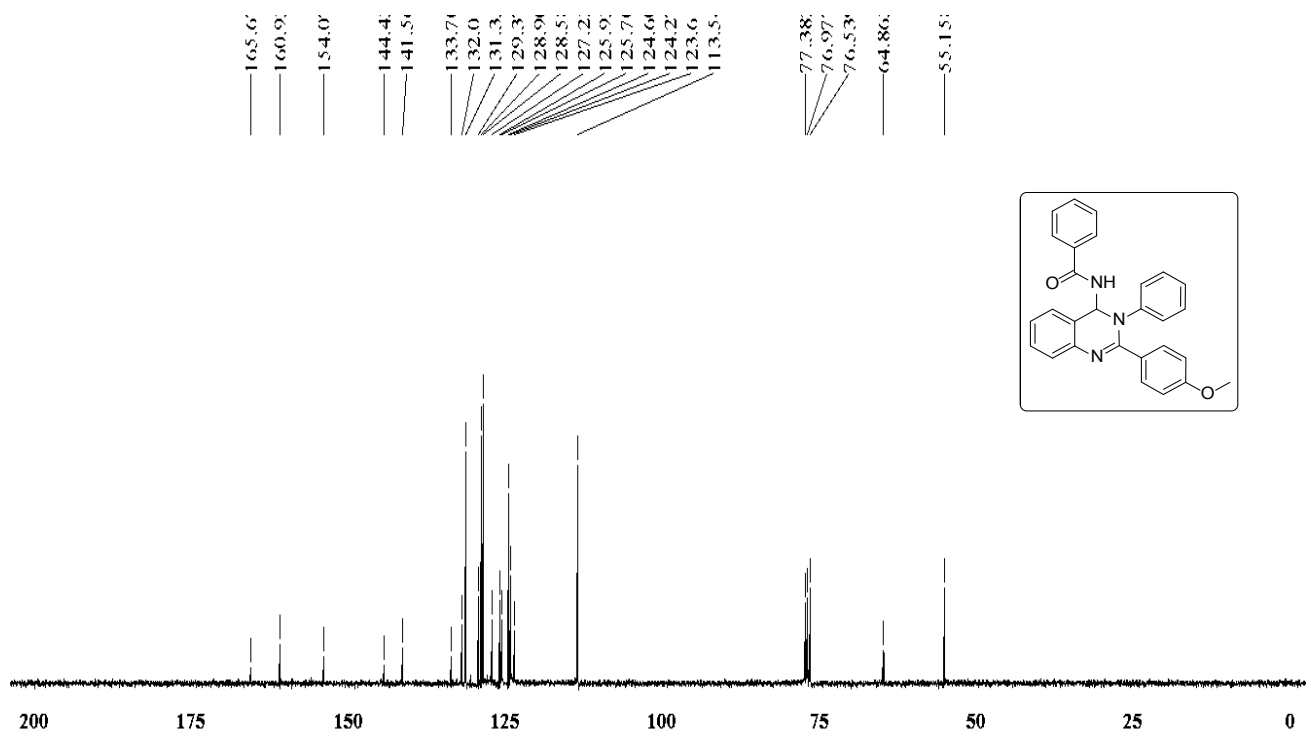

# HIGH RESOLUTION MASS SPECTRA: (Table 2, 5j)

National Centre for Mass Spectrometry

KRR-SAI-74#8-30 RT: 0.01-0.34 AV: 97 NL 2 10E3  
 T: FTMS (1,1) + p ESI Full ms [100.00-2000.00]

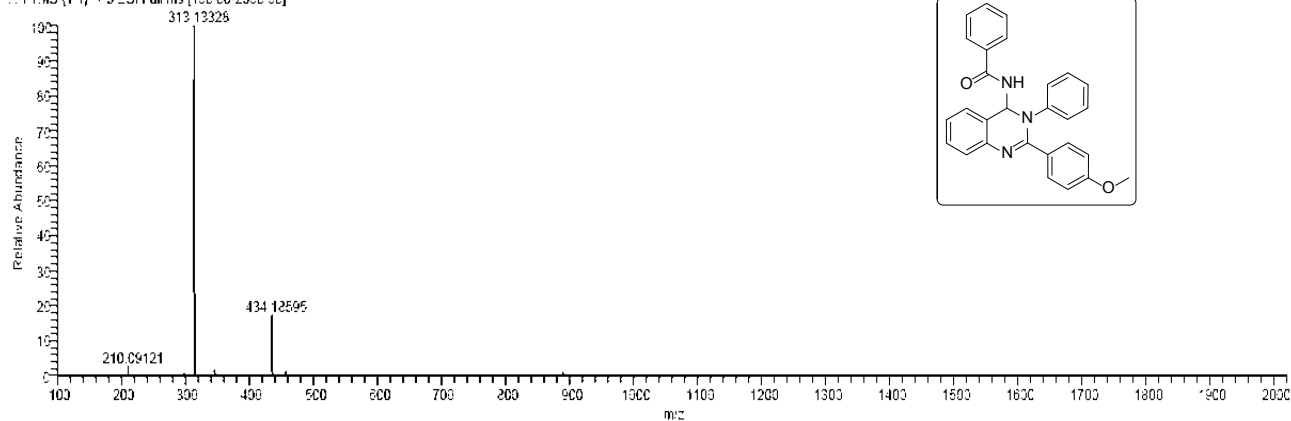

KRR-SAI-74#8-30 RT: 0.03-0.11 AV: 23

T: FTMS (1,1) + p ESI Full ms [100.00-2000.00]

m/z= 400.71-478.98

| m/z       | Intensity  | Relative | Theo. Mass | Delta (ppm) | RDB equiv. | Composition                                                   |
|-----------|------------|----------|------------|-------------|------------|---------------------------------------------------------------|
| 434.18580 | 55150060.0 | 100.00   | 434.18630  | -1.16       | 18.5       | C <sub>28</sub> H <sub>24</sub> O <sub>2</sub> N <sub>3</sub> |
| 435.18950 | 16283793.0 | 29.53    |            |             |            |                                                               |

**<sup>1</sup>H NMR (300 MHz, CDCl<sub>3</sub>): (Table 2, 5k)**

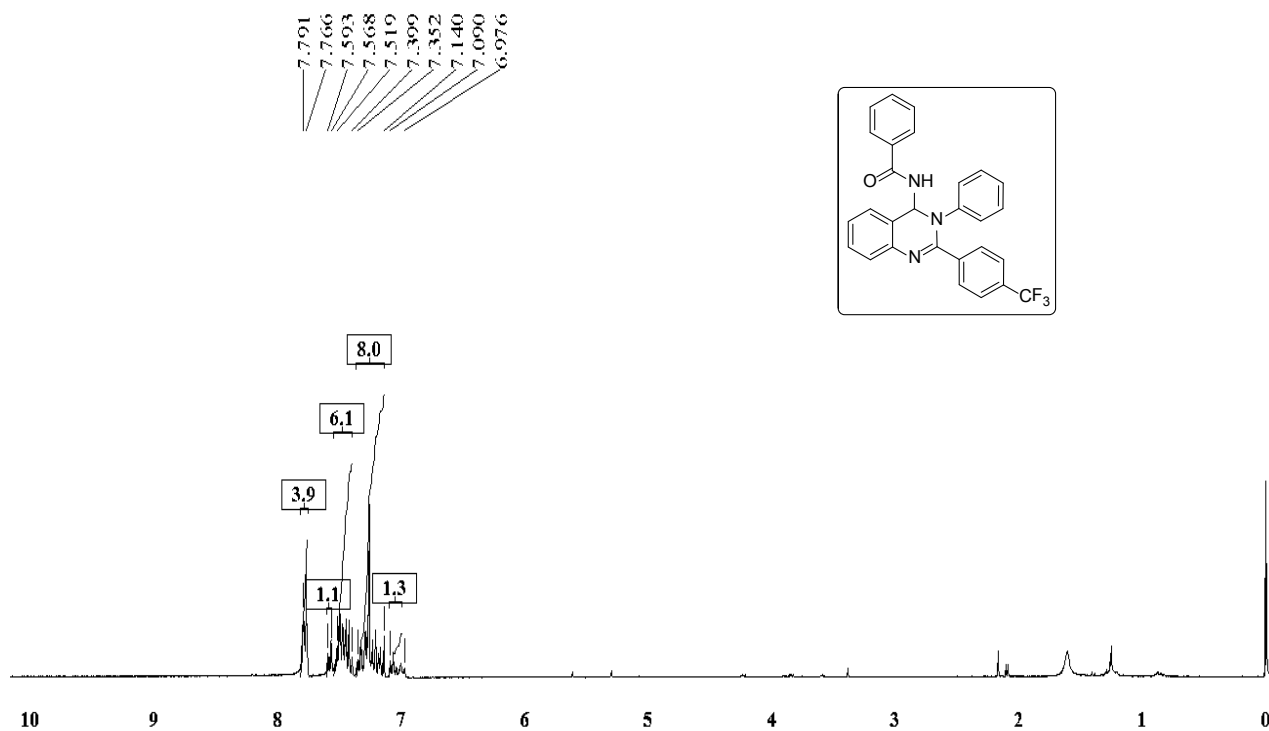

**<sup>13</sup>C NMR (75 MHz, CDCl<sub>3</sub>): (Table 2, 5k)**

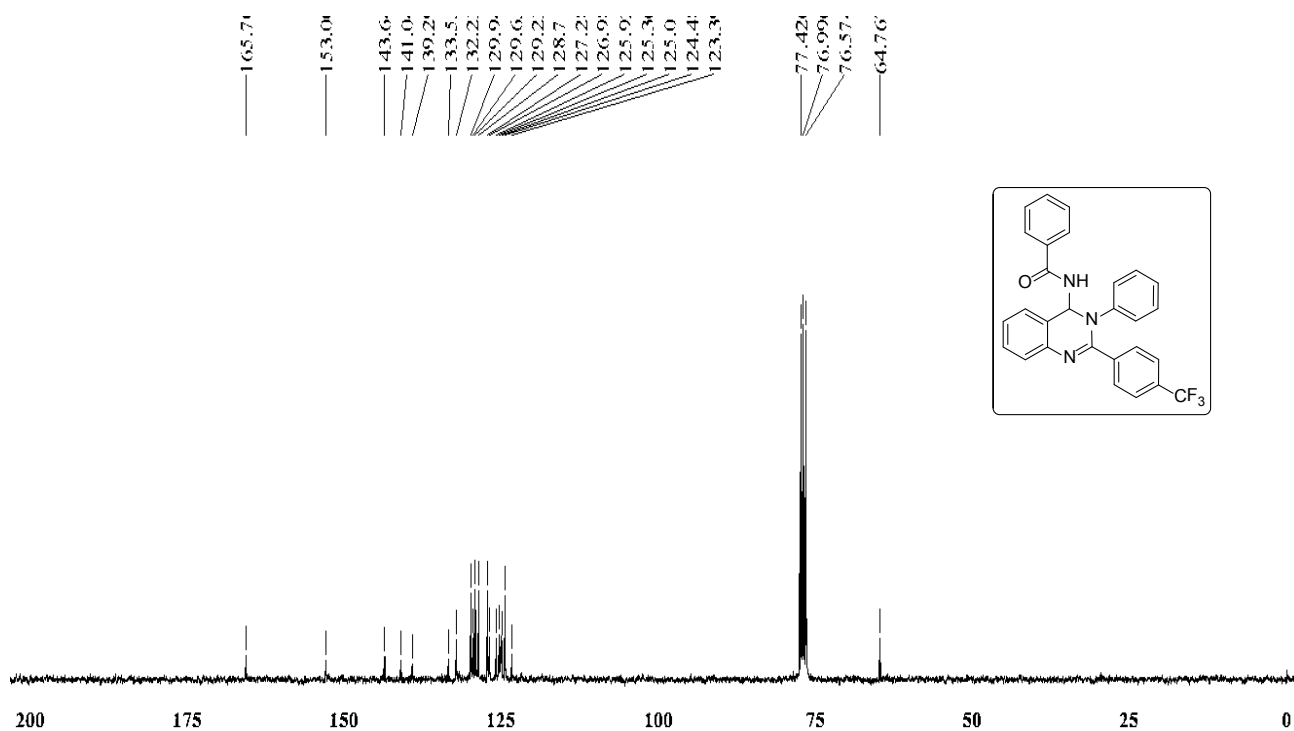

# HIGH RESOLUTION MASS SPECTRA: (Table 2, 5k)

National Centre for Mass Spectrometry

KRR-SAI-77#2-58 RT: 0.01-0.24 AV: 97 NL: 204E3  
 T: FTMS (1,1) + p ESI Full ms [100.00-2000.00]

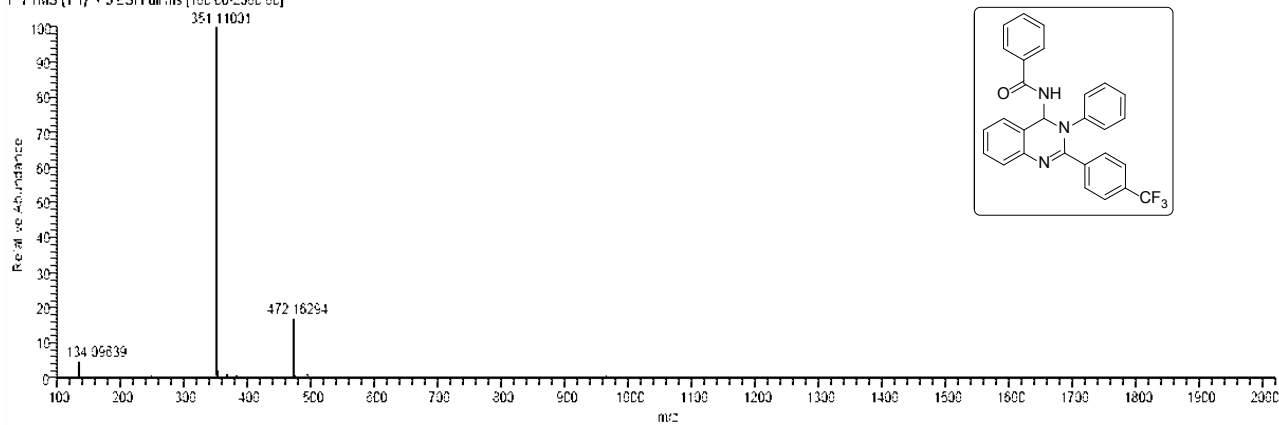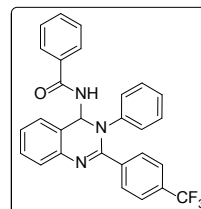

KRR-SAI-77#8-30 RT: 0.03-0.11 AV: 23

T: FTMS (1,1) + p ESI Full ms [100.00-2000.00]

m/z = 444.90-489.08

| m/z       | Intensity  | Relative | Theo. Mass | Delta | RDB    | Composition                                                    |
|-----------|------------|----------|------------|-------|--------|----------------------------------------------------------------|
|           |            |          |            | (ppm) | equiv. |                                                                |
| 472.16281 | 49721168.0 | 100.00   | 472.16312  | -0.67 | 18.5   | C <sub>28</sub> H <sub>21</sub> ON <sub>3</sub> F <sub>3</sub> |
| 473.16601 | 15238817.0 | 30.65    |            |       |        |                                                                |

**<sup>1</sup>H NMR (500 MHz, DMSO-d<sub>6</sub>): (Table 2, 5I)**

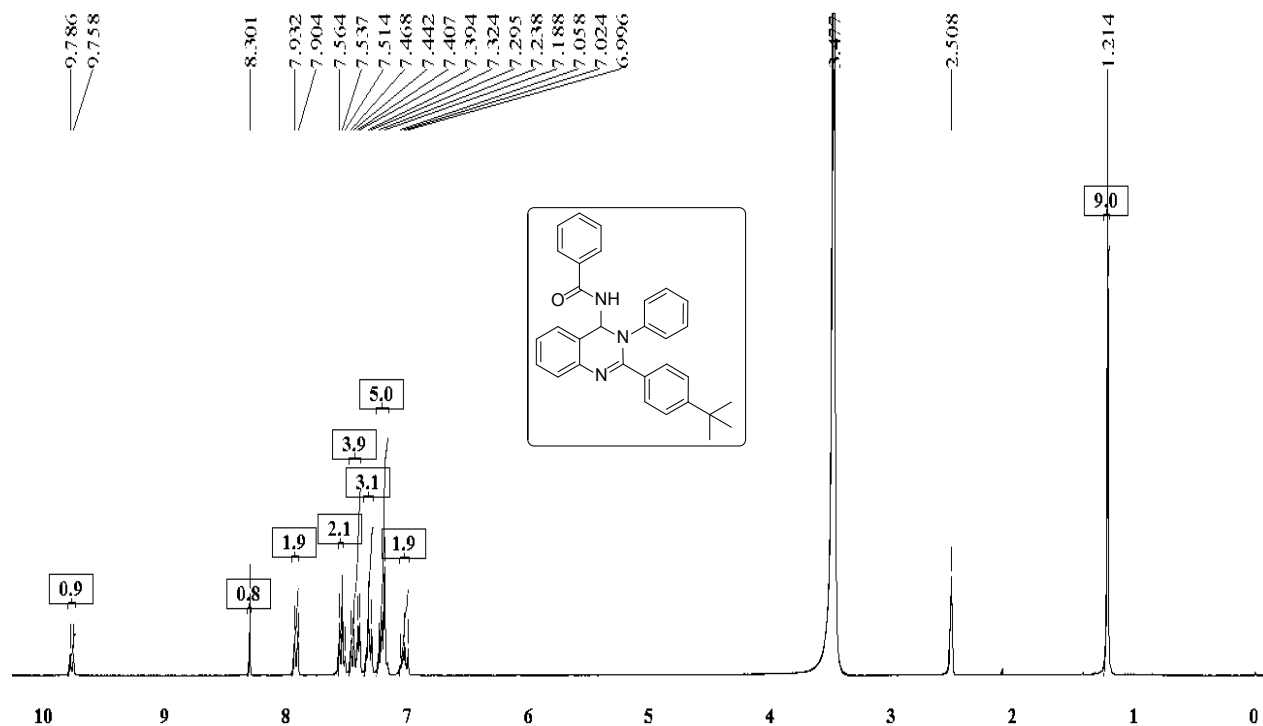

**<sup>13</sup>C NMR (75 MHz, DMSO-d<sub>6</sub>): (Table 2, 5I)**

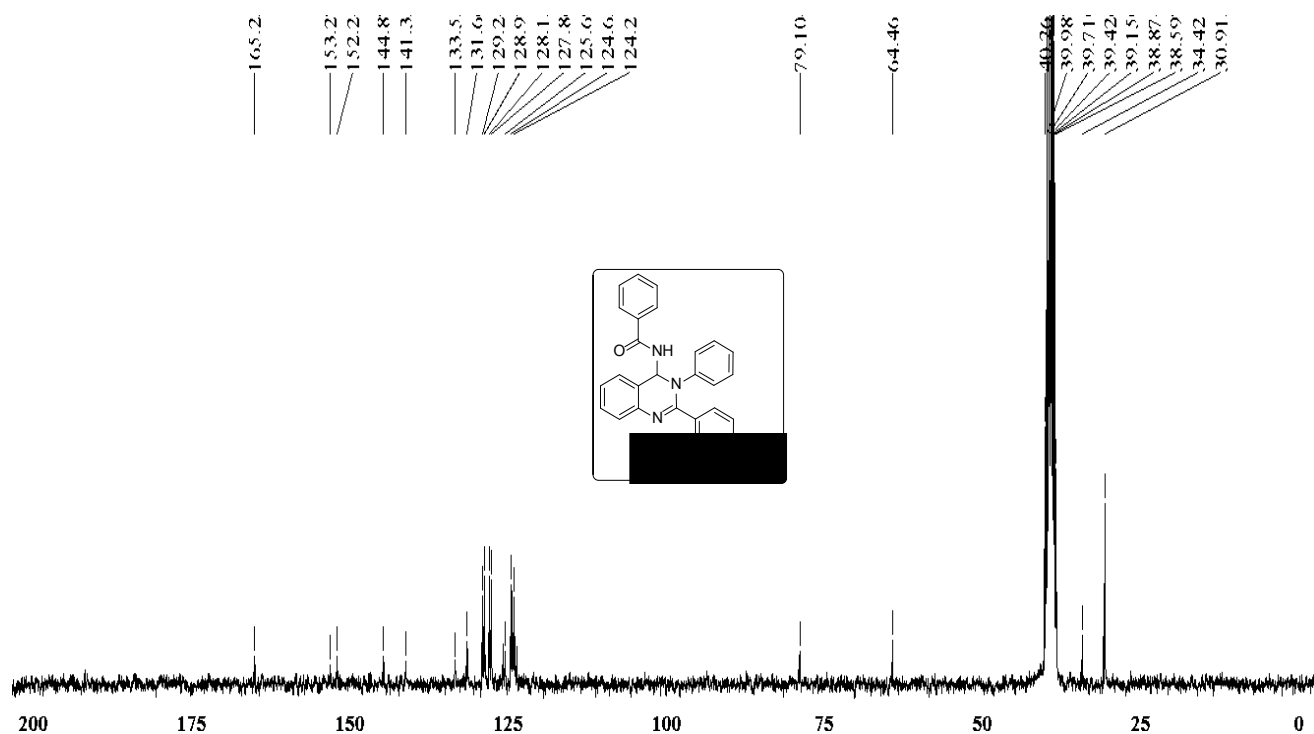



# HIGH RESOLUTION MASS SPECTRA: (Table 2, 5I)

National Centre for Mass Spectrometry

KRR-SAI-79#3-58 RT: 0.01-0.34 AV: 95 NL: 179E2  
 T: FTMS (1,1) + s ESI Full ms [100.00-2000.00]

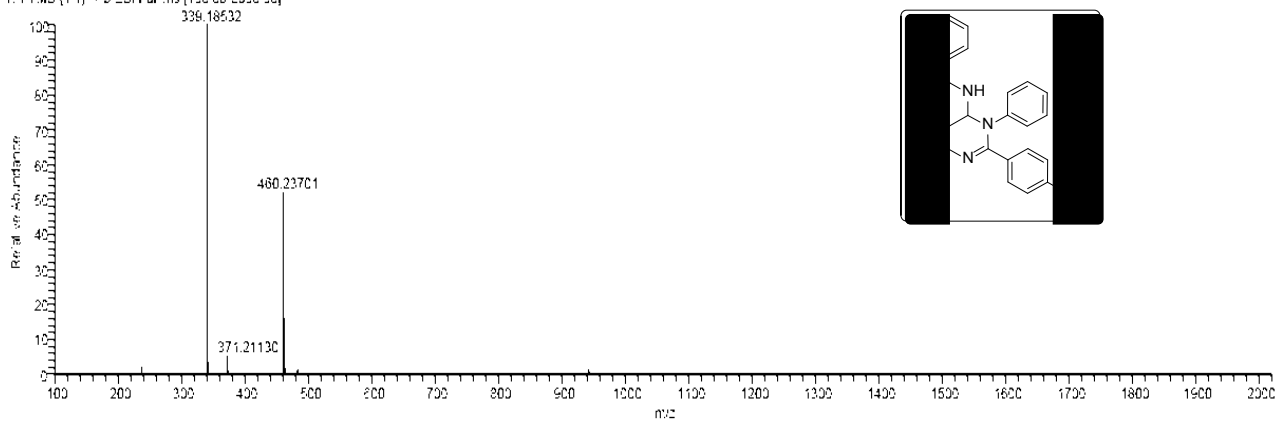

KRR-SAI-79#8-30 RT: 0.03-0.11 AV: 23

T: FTMS {1,1} + p ESI Full ms [100.00-2000.00]

m/z= 437.32-477.72

| m/z       | Intensity   | Relative | Theo. Mass | Delta | RDB    | Composition                                     |
|-----------|-------------|----------|------------|-------|--------|-------------------------------------------------|
|           |             |          |            | (ppm) | equiv. |                                                 |
| 460.23700 | 146705488.0 | 100.00   | 460.23834  | -2.90 | 18.5   | C <sub>31</sub> H <sub>30</sub> ON <sub>3</sub> |
| 461.24119 | 46438476.0  | 31.65    |            |       |        |                                                 |

<sup>1</sup>H NMR (500 MHz, CDCl<sub>3</sub>): (Table 2, 5m)

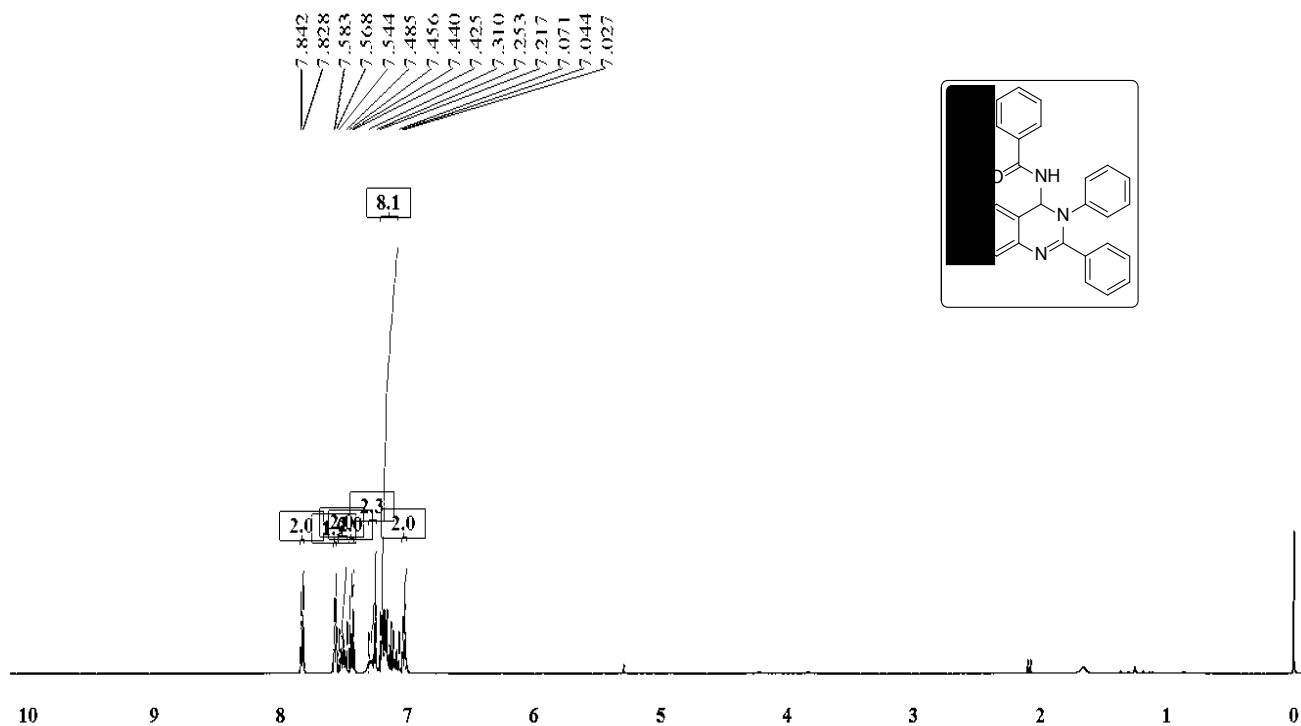

<sup>13</sup>C NMR (125 MHz, CDCl<sub>3</sub>): (Table 2, 5m)

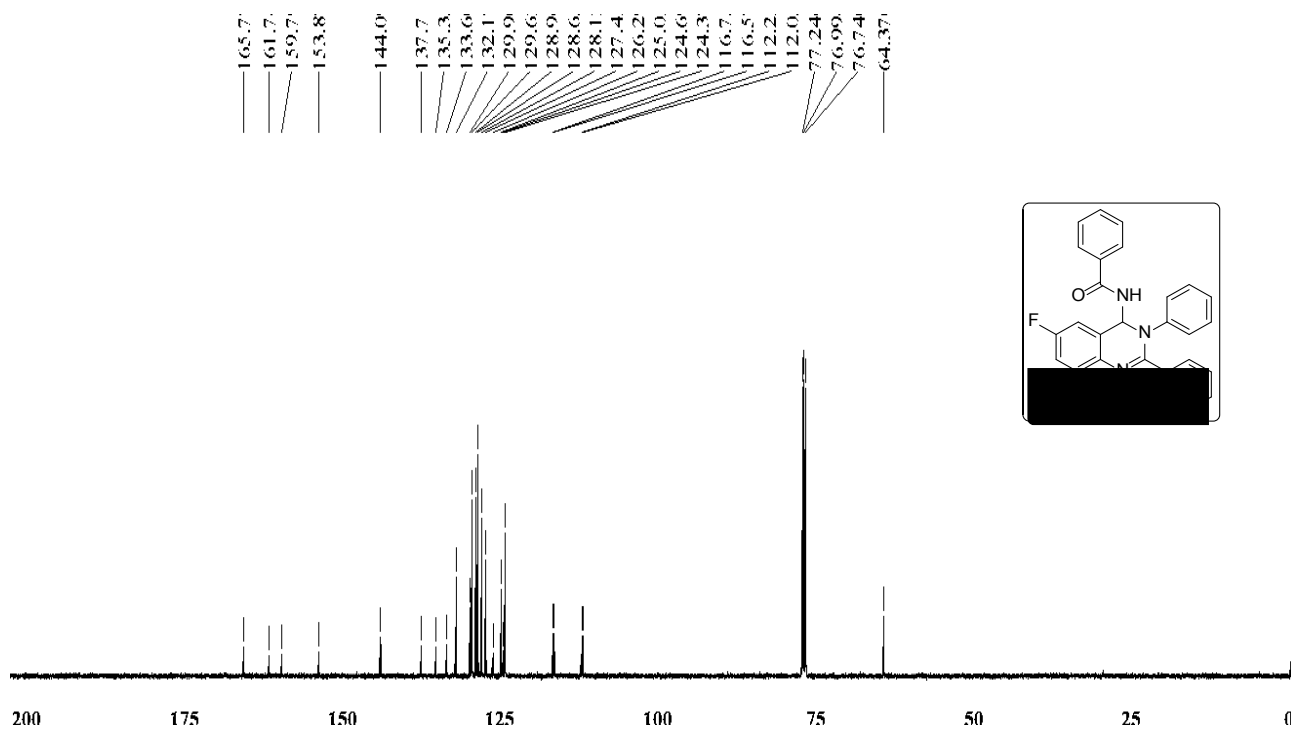

# HIGH RESOLUTION MASS SPECTRA: (Table 2, 5m)

National Centre for Mass Spectrometry  
CSIR-Indian Institute of Chemical Technology

File Name C:\ICT-HRMS\16.01.2014-KRR-SAI-88

Sample Name

Sample ID G SAIDULU

Date and Time 16-01-14 16:58:56

KRR-SAI-88#7-106 RT: 0.02-0.36 AV: 132 SB: 222.099-194 NL: 2.10E8

T: FTMS (1,1) + p ESI Full ms [100.00-2000.00]

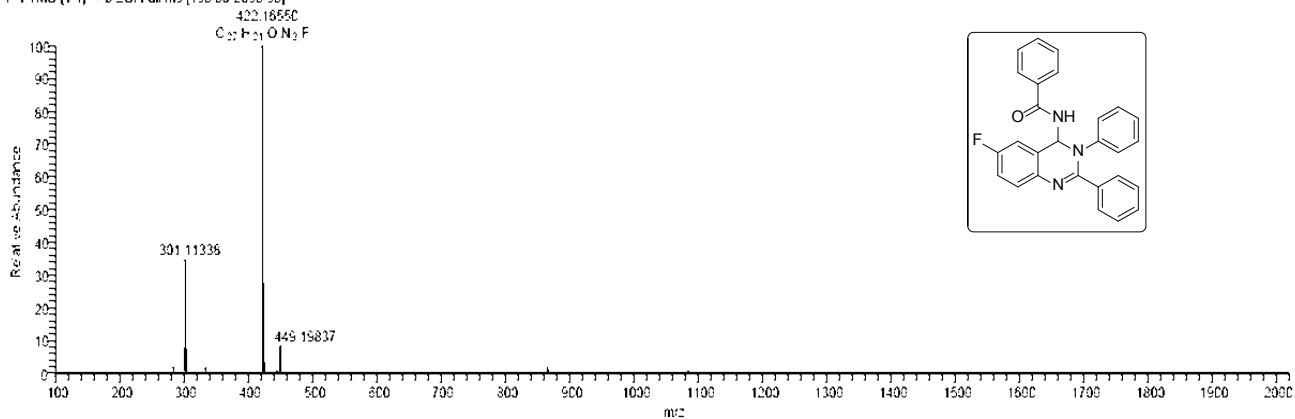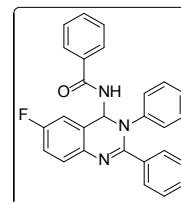

KRR-SAI-88#8-30 RT: 0.03-0.10 AV: 23

T: FTMS (1,1) + p ESI Full ms [100.00-2000.00]

| m/z       | Intensity   | Relative | Theo. Mass | Delta (ppm) | RDB equiv. | Composition |
|-----------|-------------|----------|------------|-------------|------------|-------------|
| 301.11328 | 85417728.0  | 36.55    |            |             |            |             |
| 422.16542 | 233691344.0 | 100.00   |            |             |            |             |

<sup>1</sup>H NMR (300 MHz, CDCl<sub>3</sub>): (Table 2, 5n)

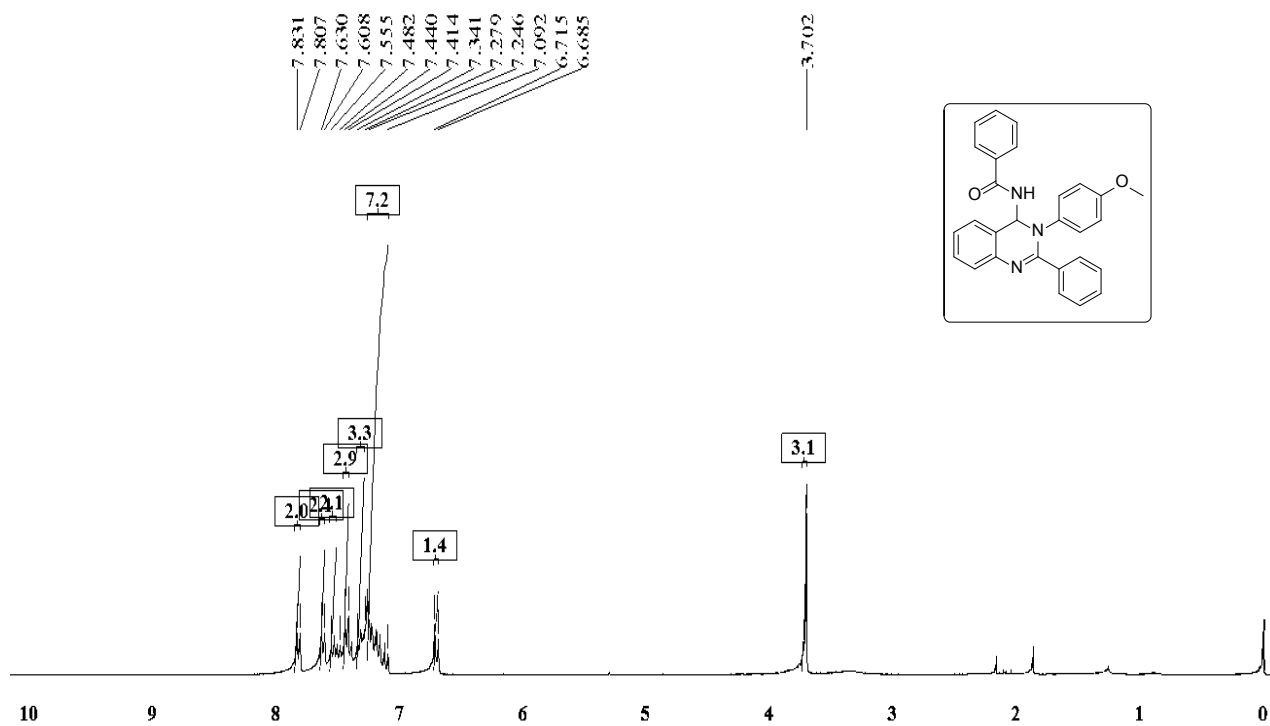

<sup>13</sup>C NMR (125 MHz, CDCl<sub>3</sub>): (Table 2, 5n)

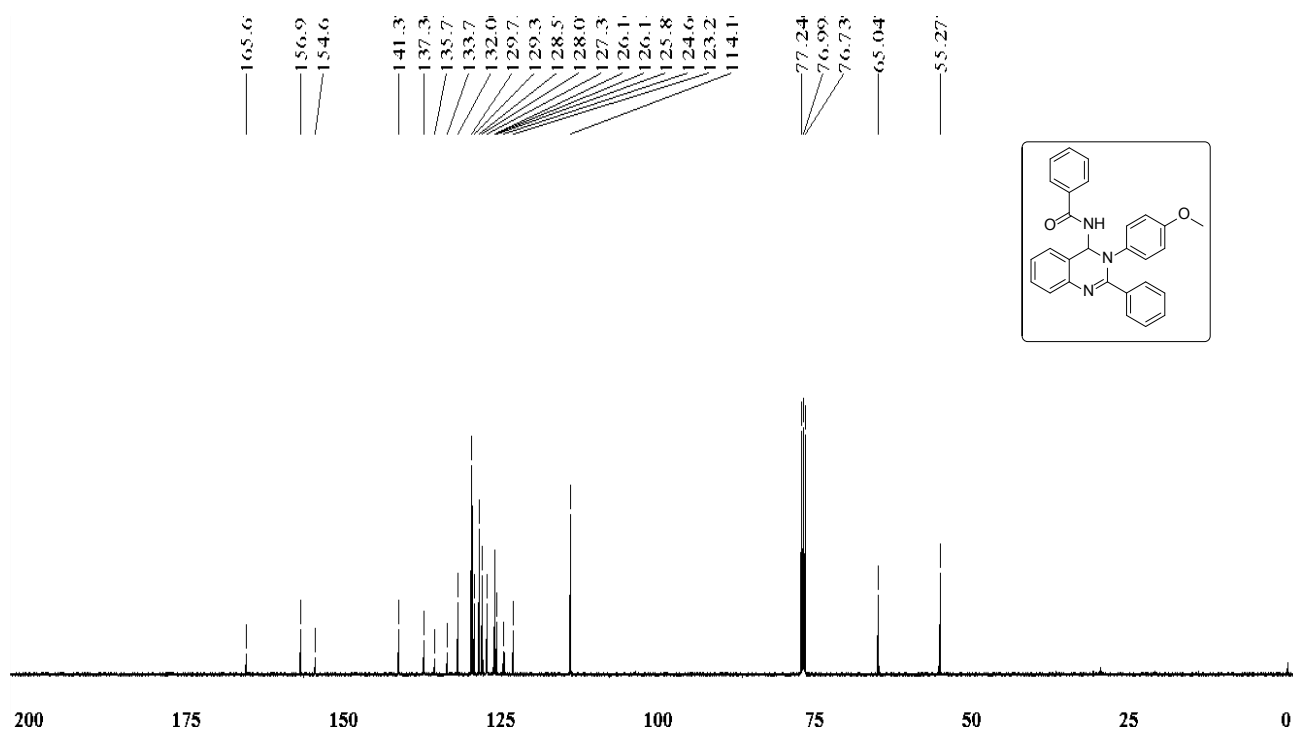

# HIGH RESOLUTION MASS SPECTRA: (Table 2, 5n)

National Centre for Mass Spectrometry  
CSIR-Indian Institute of Chemical Technology

File Name C:\ICT-HRMS\16-01-2014\KRR-SAI-93  
Sample Name  
Sample ID G SAIDULU  
Date and Time 16-01-14 17:07:24  
KRR-SAI-93#8-105 RT: 0.03-0.10 AV: 23 SB: 282 0.99-1.94 NL 2 29E8  
T: FTMS (1,1) + p ESI Full ms [100.00-2000.00]

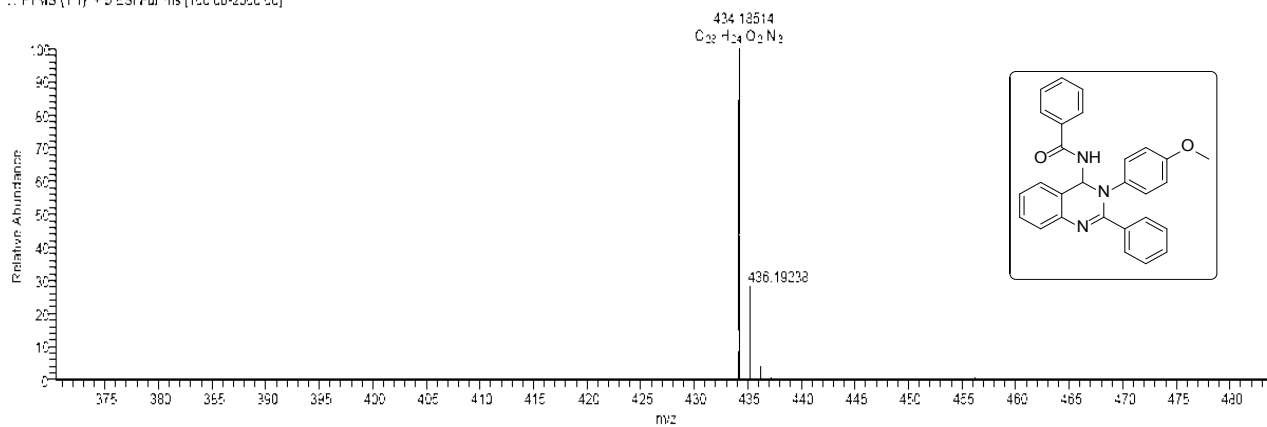

KRR-SAI-93#8-30 RT: 0.03-0.10 AV: 23

T: FTMS {1,1} + p ESI Full ms [100.00-2000.00]

| m/z       | Intensity   | Relative | Theo. Mass | Delta (ppm) | RDB equiv. | Composition |
|-----------|-------------|----------|------------|-------------|------------|-------------|
| 313.13315 | 95680376.0  | 34.24    |            |             |            |             |
| 434.18497 | 279455904.0 | 100.00   |            |             |            |             |

**<sup>1</sup>H NMR (300 MHz, DMSO-d<sub>6</sub>): (Table 2, 5o)**

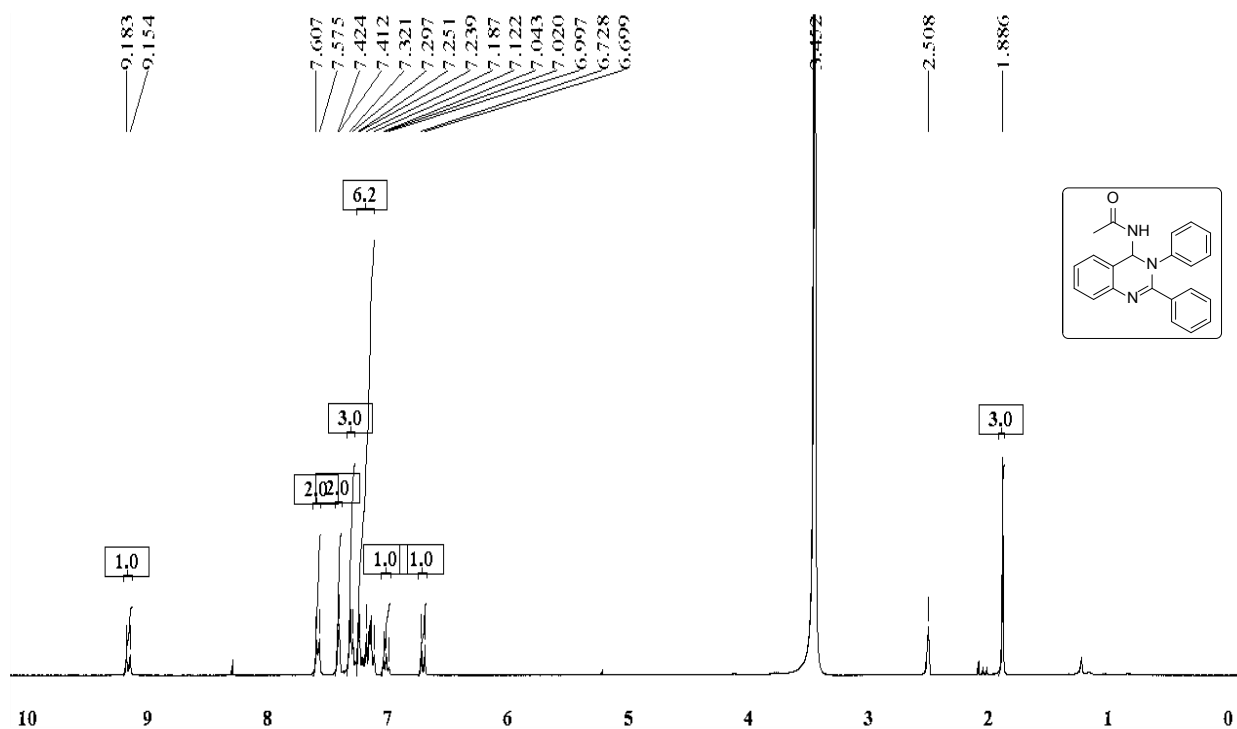

**<sup>13</sup>C NMR (125 MHz, DMSO-d<sub>6</sub>): (Table 3, 5o)**

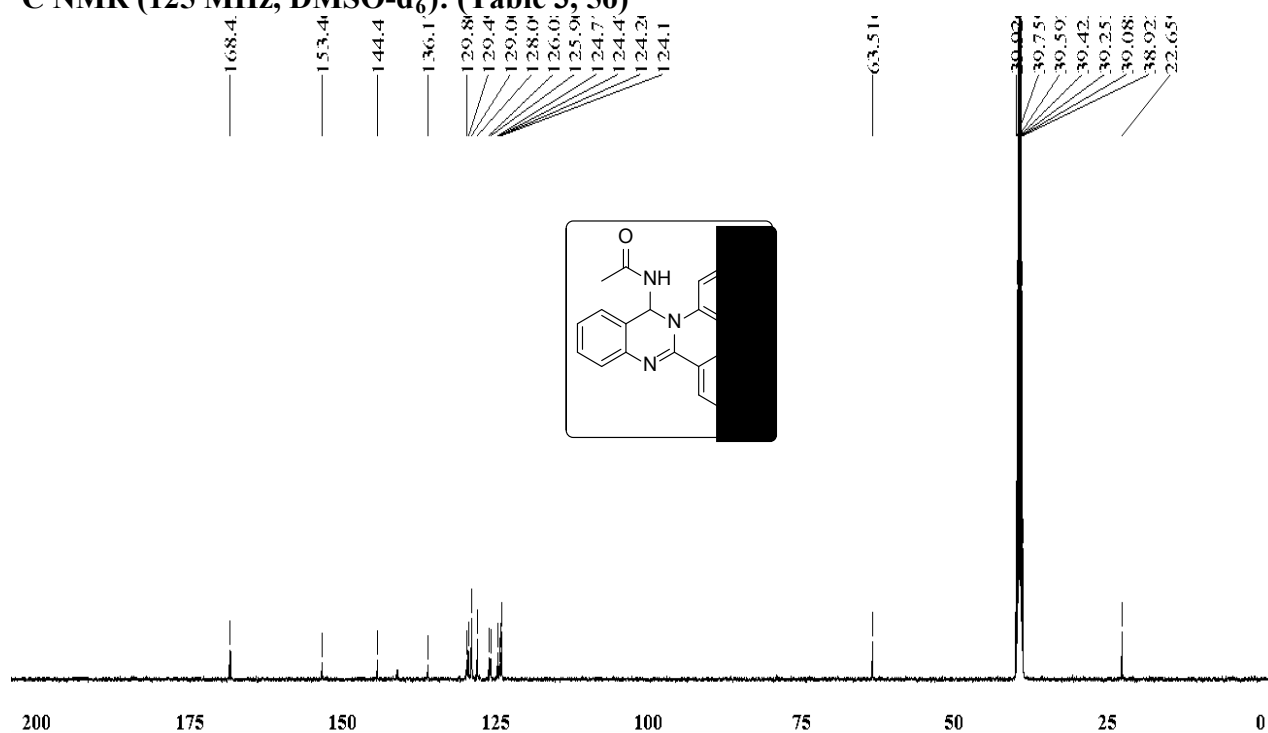

# HIGH RESOLUTION MASS SPECTRA: (Table 2, 5o)

National Centre for Mass Spectrometry

KRR-SAI-70#2-07 RT: 0.01-0.34 AV: 95 NL 905E7  
T: FTMS (1,1) + p ESI Full ms [100.00-2000.00]

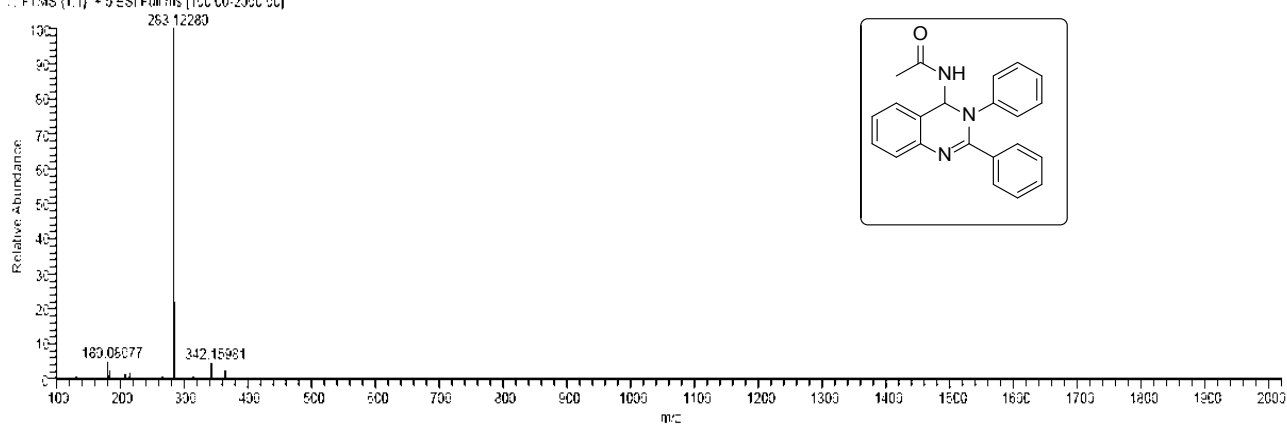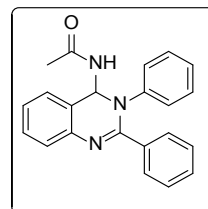

KRR-SAI-70#8-30 RT: 0.04-0.11 AV: 23

T: FTMS (1,1) + p ESI Full ms [100.00-2000.00]

m/z = 319.92-389.35

| m/z       | Intensity | Relative | Theo. Mass | Delta (ppm) | RDB equiv. | Composition                                                   |
|-----------|-----------|----------|------------|-------------|------------|---------------------------------------------------------------|
| 342.15975 | 9139558.0 | 100.00   | 342.16009  | -0.98       | 14.5       | C <sub>22</sub> H <sub>20</sub> O <sub>2</sub> N <sub>3</sub> |
| 364.14200 | 7256361.5 | 79.40    | 364.14203  | -0.08       | 14.5       | C <sub>22</sub> H <sub>19</sub> ON <sub>3</sub> Na            |

<sup>1</sup>H NMR (500 MHz, CDCl<sub>3</sub>): (Table 2, 5p)

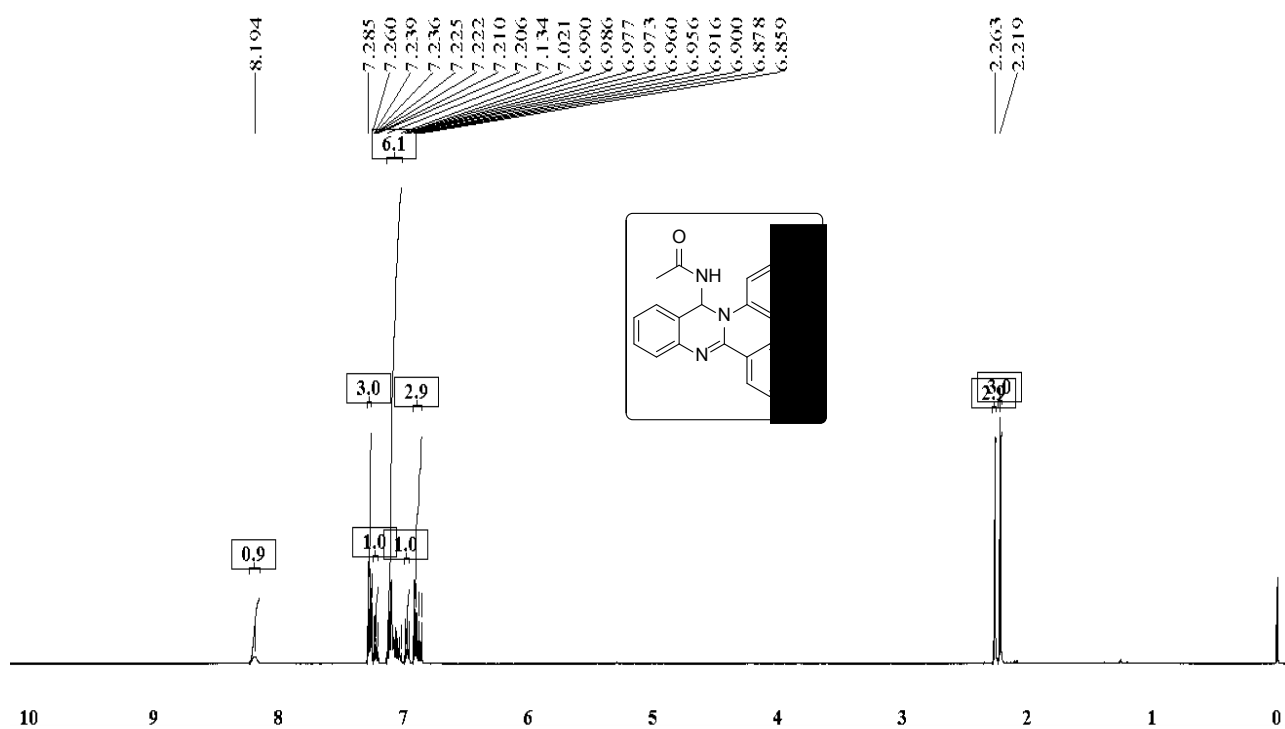

<sup>13</sup>C NMR (125 MHz, CDCl<sub>3</sub>): (Table 2, 5p)

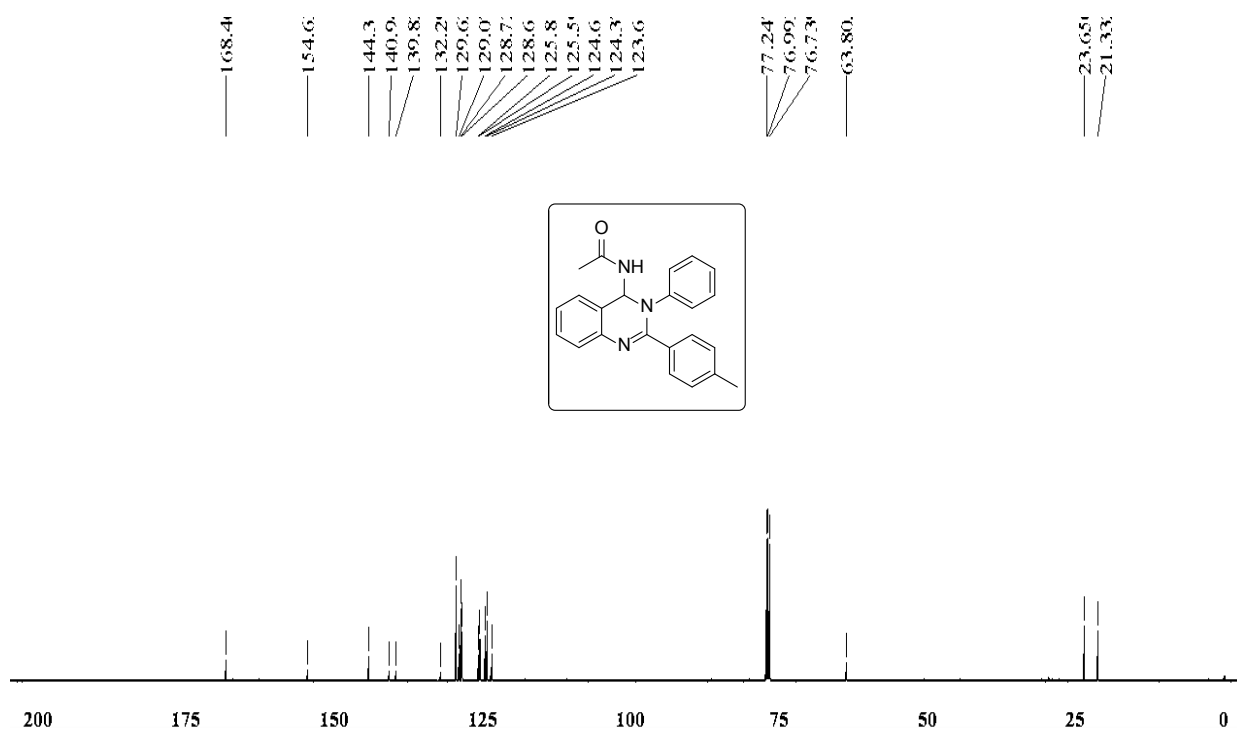



# HIGH RESOLUTION MASS SPECTRA: (Table 2, 5p)

National Centre for Mass Spectrometry

KRR-SAI-75#8-30 RT: 0.03-0.11 AV: 23  
 T: FTMS (1,1) + p ESI Full ms [100.00-2000.00]

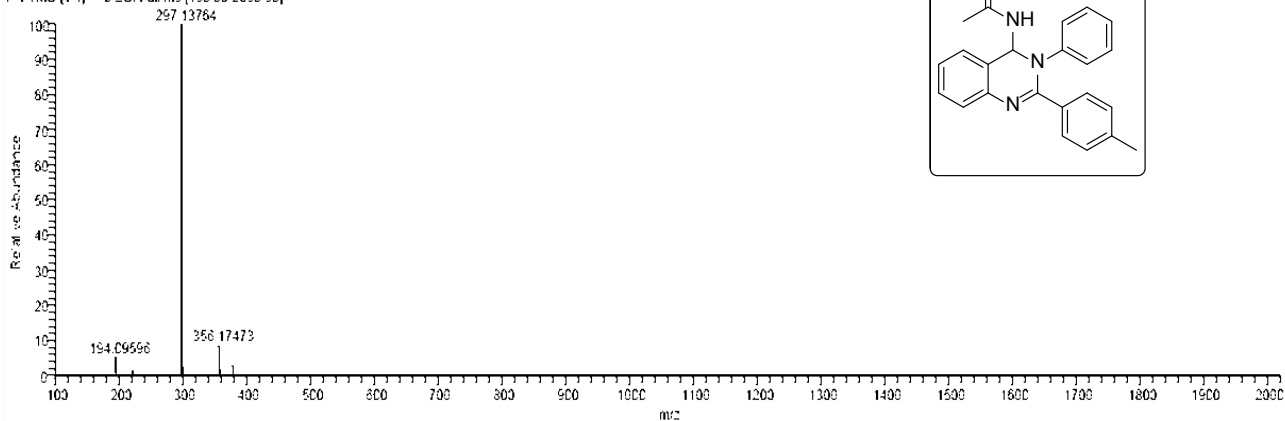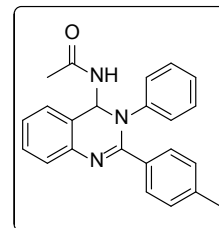

KRR-SAI-75#8-30 RT: 0.03-0.11 AV: 23

T: FTMS (1,1) + p ESI Full ms [100.00-2000.00]

m/z = 338.86-375.47

| m/z       | Intensity  | Relative | Theo. Mass | Delta | RDB    | Composition                                       |
|-----------|------------|----------|------------|-------|--------|---------------------------------------------------|
|           |            |          |            | (ppm) | equiv. |                                                   |
| 356.17473 | 34735476.0 | 100.00   | 356.17468  | 0.15  | 11.0   | C <sub>23</sub> H <sub>25</sub> O <sub>2</sub> Na |
|           |            |          | 356.17574  | -2.84 | 14.5   | C <sub>23</sub> H <sub>22</sub> ON <sub>3</sub>   |

**<sup>1</sup>H NMR (300 MHz, CDCl<sub>3</sub> + DMSO-d<sub>6</sub>): (Table 2, 5q)**

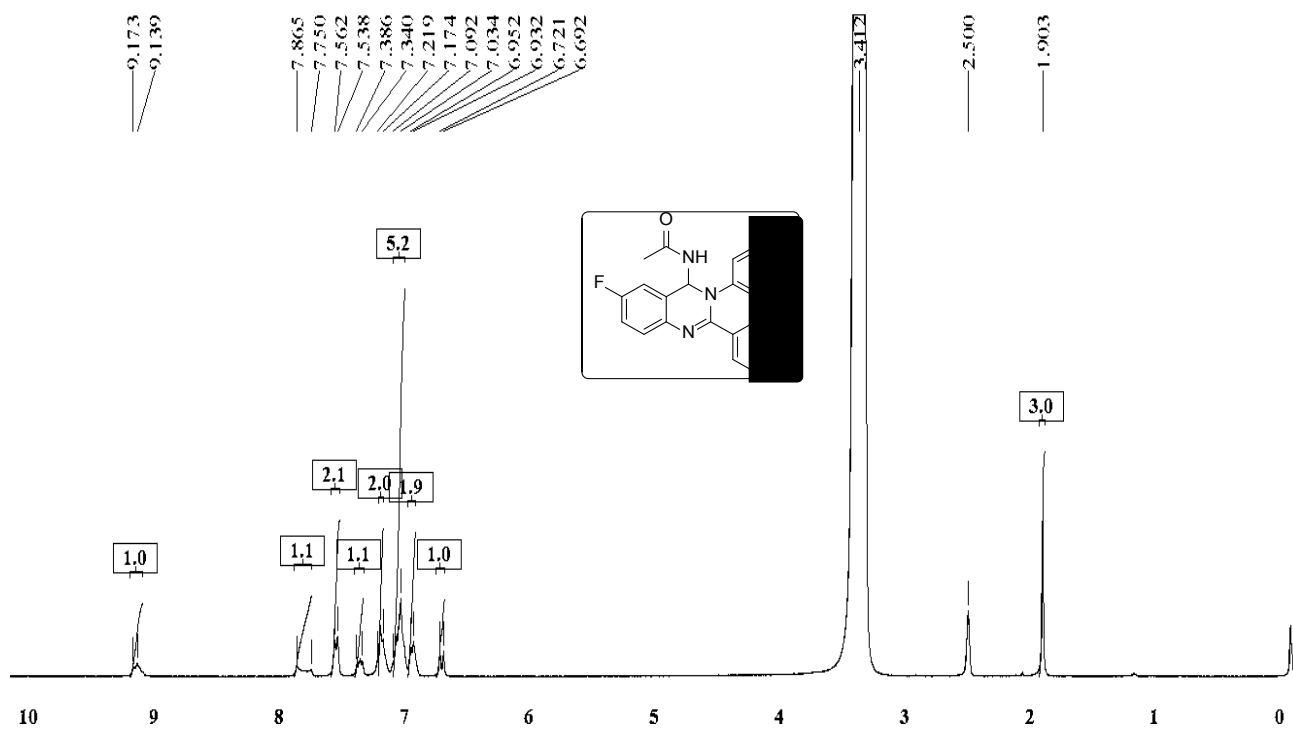

**<sup>13</sup>C NMR (125 MHz, CDCl<sub>3</sub> + DMSO-d<sub>6</sub>): (Table 2, 5q)**

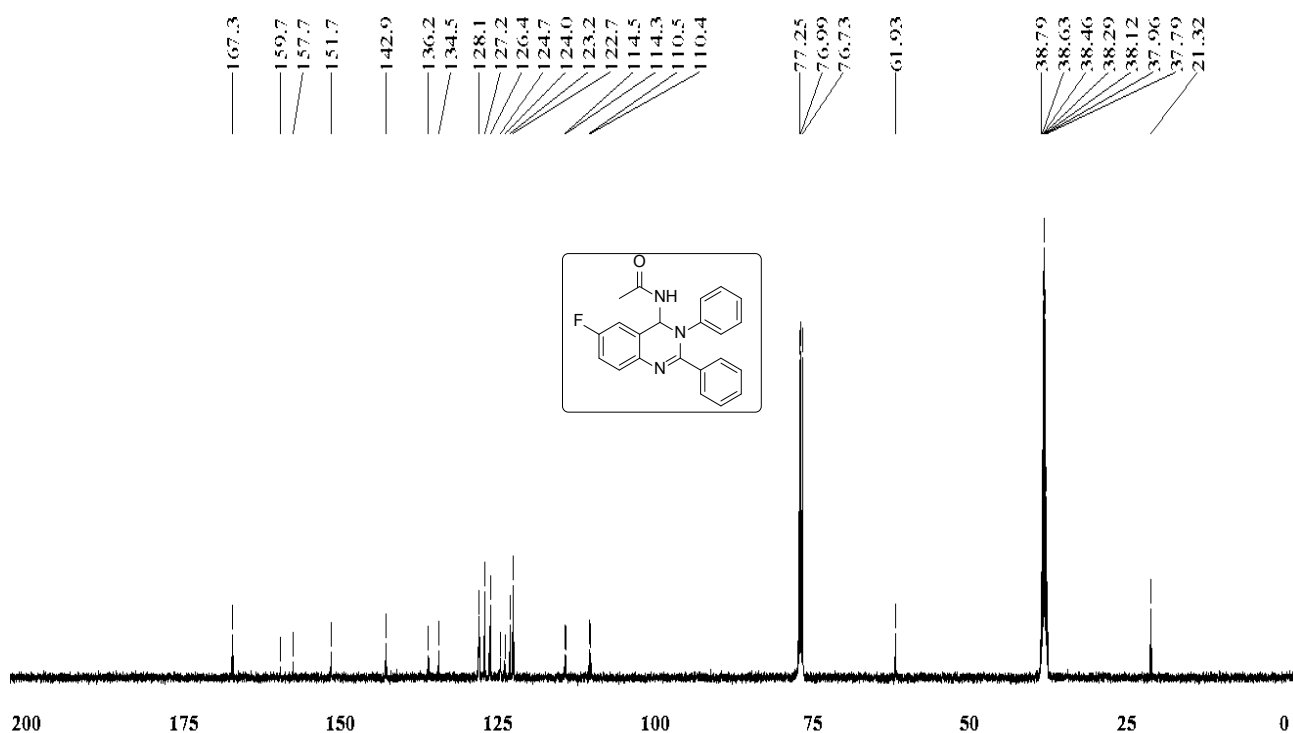

# HIGH RESOLUTION MASS SPECTRA: (Table 2, 5q)

National Centre for Mass Spectrometry  
CSIR-Indian Institute of Chemical Technology

File Name C:\IIC-T-HRMS-16.01.2014-KRR-SAI-89  
Sample Name  
Sample ID G SAIDULU  
Date and Time 16-01-14 16:59:29  
KRR-SAI-89#7-106 RT: 0.03-0.36 AV: 132 SB: 282 0.99-1.94 NL: 1.53E8  
T: FTMS (1,1) + p ESI Full ms [100.00-2000.00]

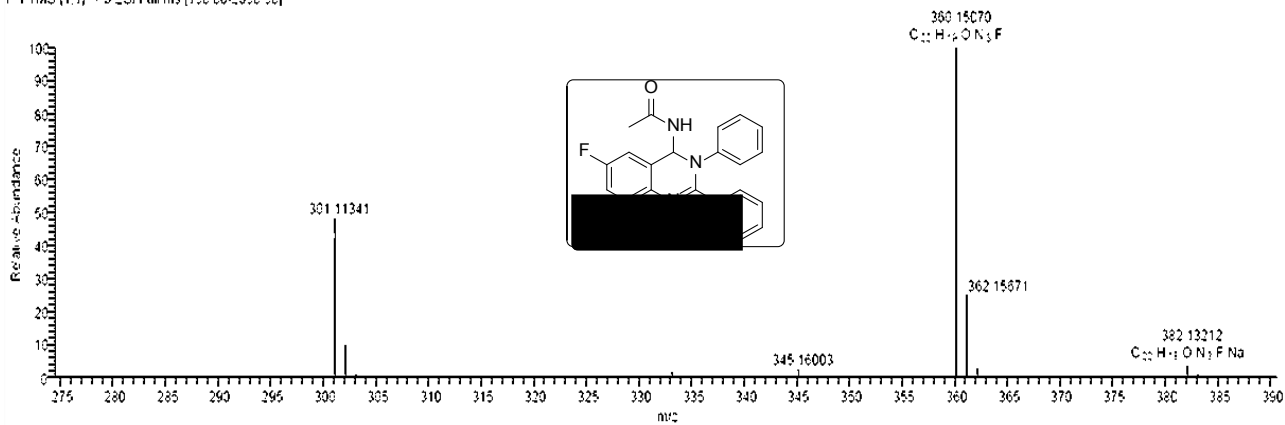

KRR-SAI-89#8-30 RT: 0.03-0.10 AV: 23

T: FTMS (1,1) + p ESI Full ms [100.00-2000.00]

| m/z       | Intensity   | Relative | Theo. Mass | Delta (ppm) | RDB equiv. | Composition |
|-----------|-------------|----------|------------|-------------|------------|-------------|
| 301.11338 | 125247360.0 | 48.96    |            |             |            |             |
| 360.15065 | 255824528.0 | 100.00   |            |             |            |             |

**<sup>1</sup>H NMR (500 MHz, CDCl<sub>3</sub>): (Table 2, 5r)**

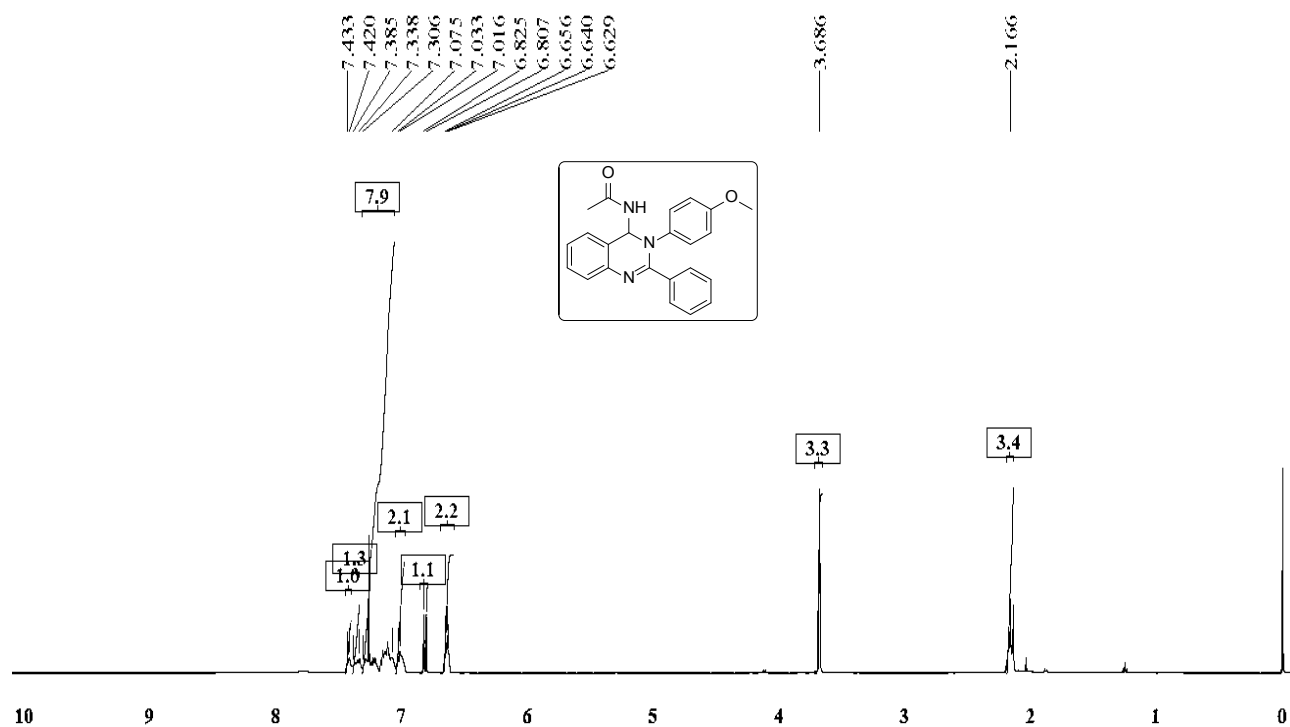

**<sup>13</sup>C NMR (75 MHz, CDCl<sub>3</sub>): (Table 2, 5r)**

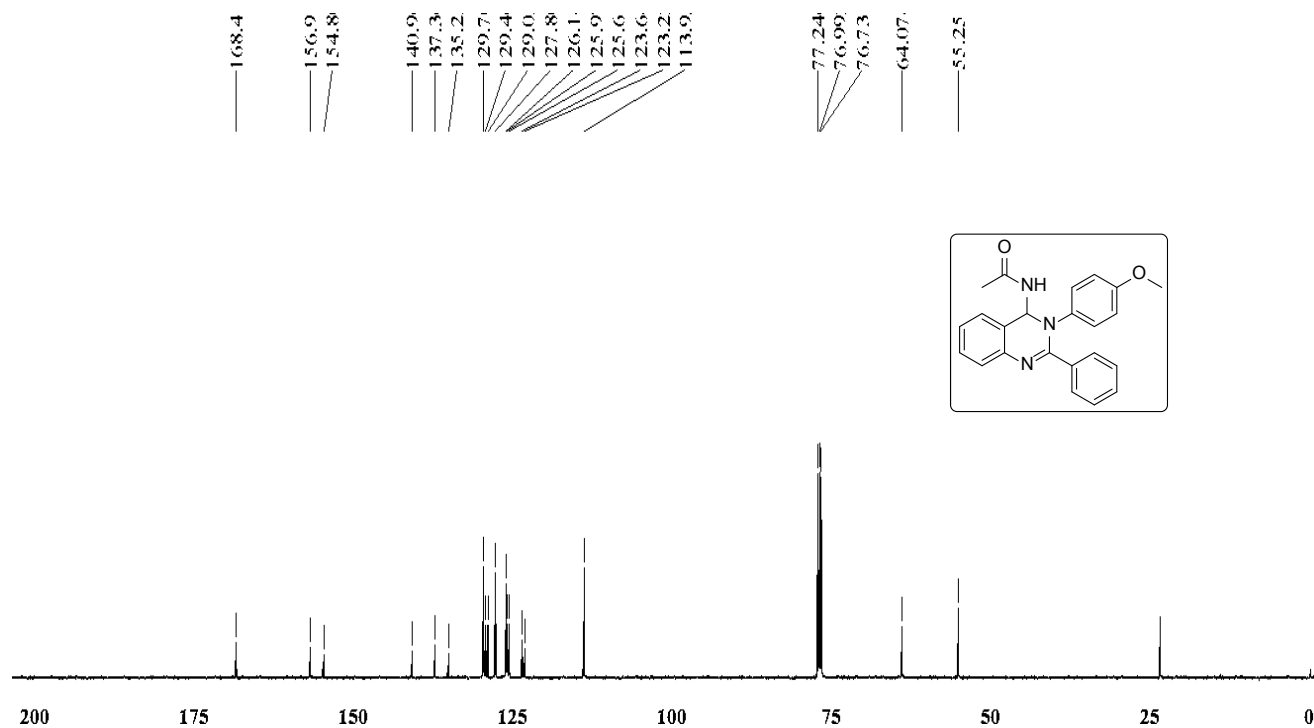

# HIGH RESOLUTION MASS SPECTRA: (Table 2, 5r)

National Centre for Mass Spectrometry  
CSIR-Indian Institute of Chemical Technology

File Name C:\ICT-HRMS\16.01.2014\KRR-SAI-94  
Sample Name  
Sample ID G SAIDULU  
Date and Time 16-01-14 17:09:59  
KRR-SAI-94#8-106 RT: 0.03-0.10 AV: 23 SB: 222 049-194 NL 2 17E8  
T: FTMS (1,1) + p ESI Full ms [100.00-2000.00]

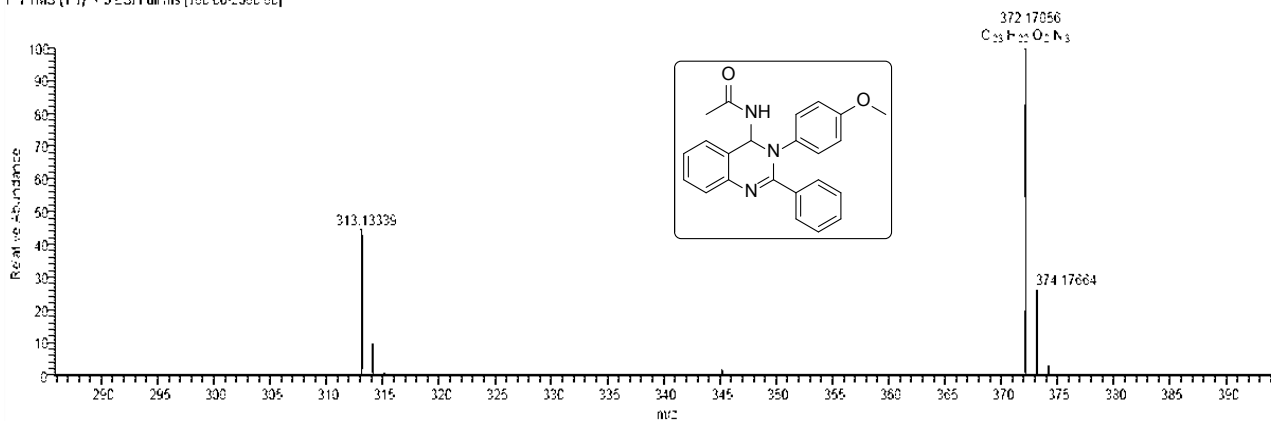

KRR-SAI-94#8-30 RT: 0.03-0.10 AV: 23

T: FTMS (1,1) + p ESI Full ms [100.00-2000.00]

| m/z       | Intensity   | Relative | Theo. Mass | Delta (ppm) | RDB equiv. | Composition |
|-----------|-------------|----------|------------|-------------|------------|-------------|
| 313.13333 | 100293880.0 | 43.61    |            |             |            |             |
| 372.17052 | 229982784.0 | 100.00   |            |             |            |             |

**<sup>1</sup>H NMR (500 MHz, CDCl<sub>3</sub> + DMSO-d<sub>6</sub>): (Table 2, 5s)**

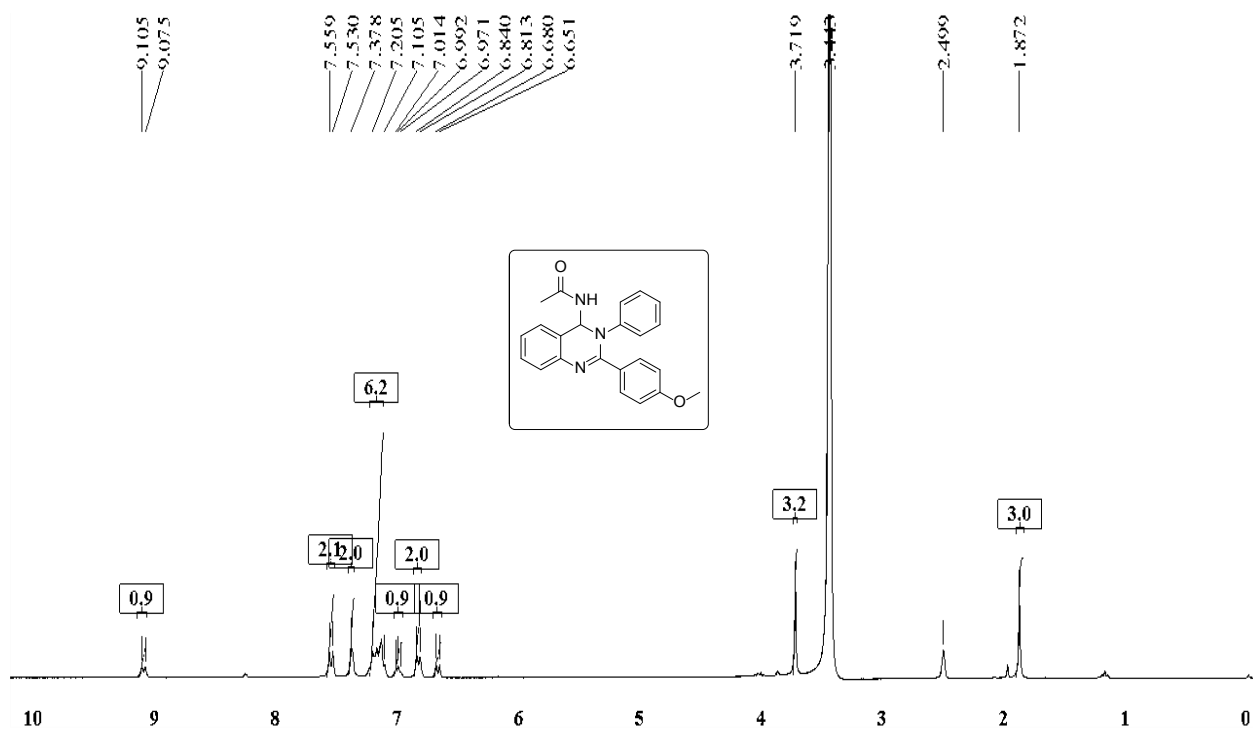

**<sup>13</sup>C NMR (125 MHz, CDCl<sub>3</sub> + DMSO-d<sub>6</sub>): (Table 2, 5s)**

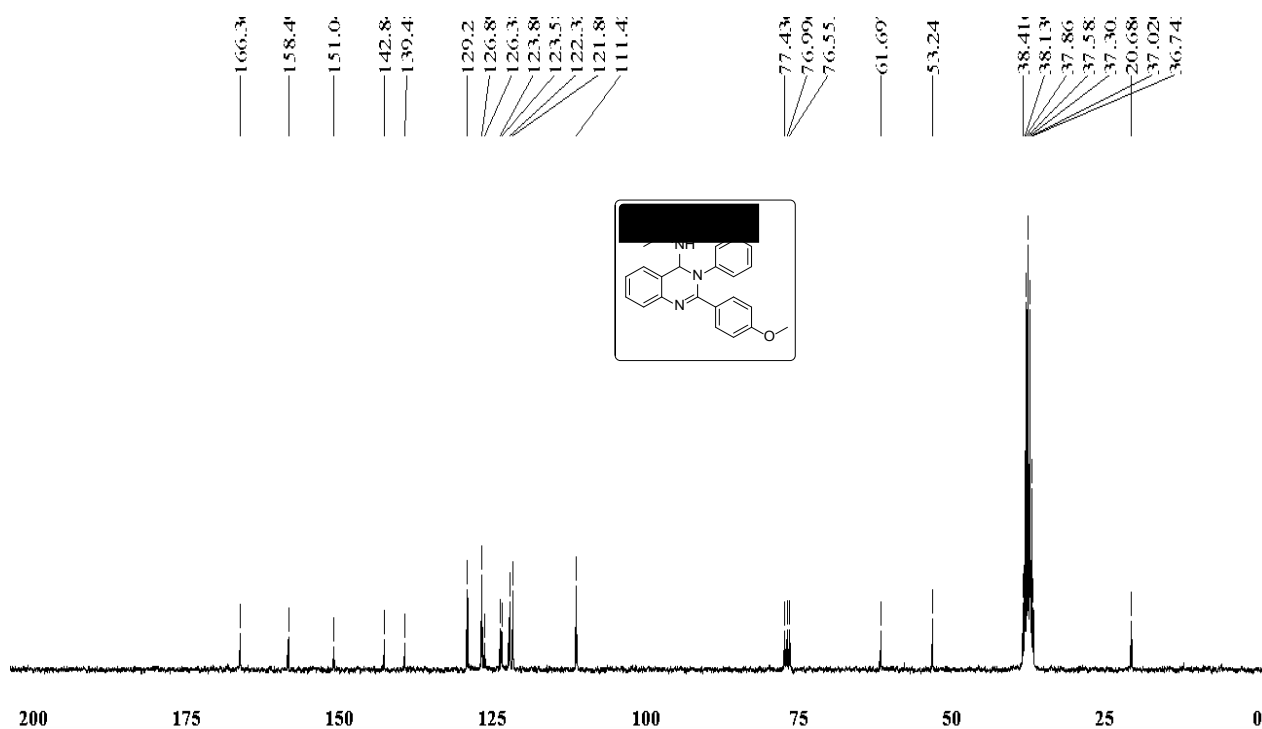

# HIGH RESOLUTION MASS SPECTRA: (Table 2, 5s)

National Centre for Mass Spectrometry

KRR-SAI-72 #3-99 RT: 0.01-0.34 AV: 97 NL: 196E3  
T: FTMS (1,1) + p ESI Full ms [100.00-2000.00]

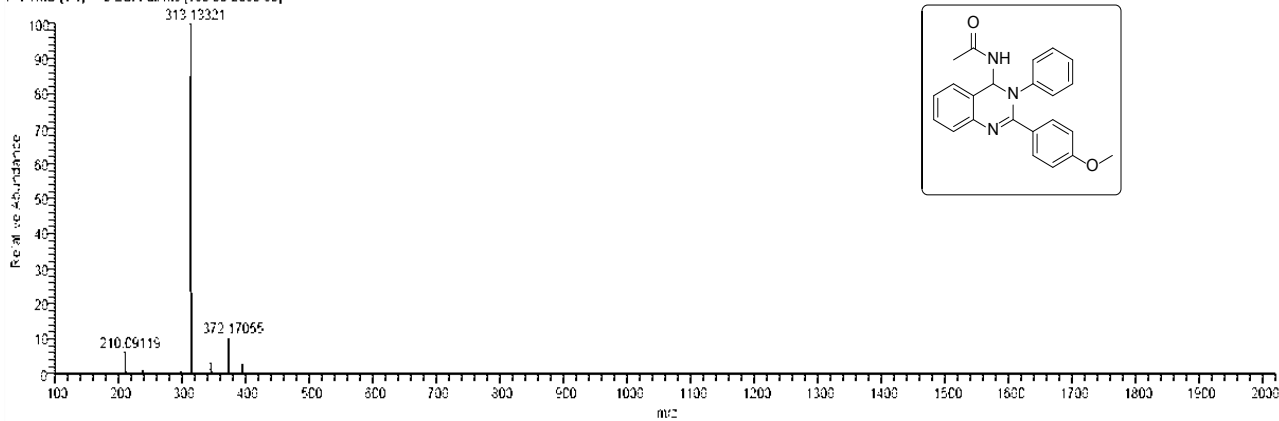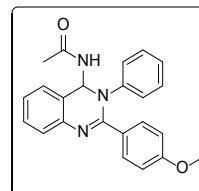

KRR-SAI-76#8-30 RT: 0.03-0.11 AV: 23  
T: FTMS (1,1) + p ESI Full ms [100.00-2000.00]  
m/z = 352.74-389.35

| m/z       | Intensity  | Relative | Theo. Mass | Delta | RDB    | Composition                                                   |
|-----------|------------|----------|------------|-------|--------|---------------------------------------------------------------|
|           |            |          |            | (ppm) | equiv. |                                                               |
| 372.17051 | 28083474.0 | 100.00   | 372.17065  | -0.39 | 14.5   | C <sub>23</sub> H <sub>22</sub> O <sub>2</sub> N <sub>3</sub> |
| 373.17357 | 6645891.5  | 23.66    |            |       |        |                                                               |

**<sup>1</sup>H NMR (500 MHz, CDCl<sub>3</sub>): (Table 2, 5t)**

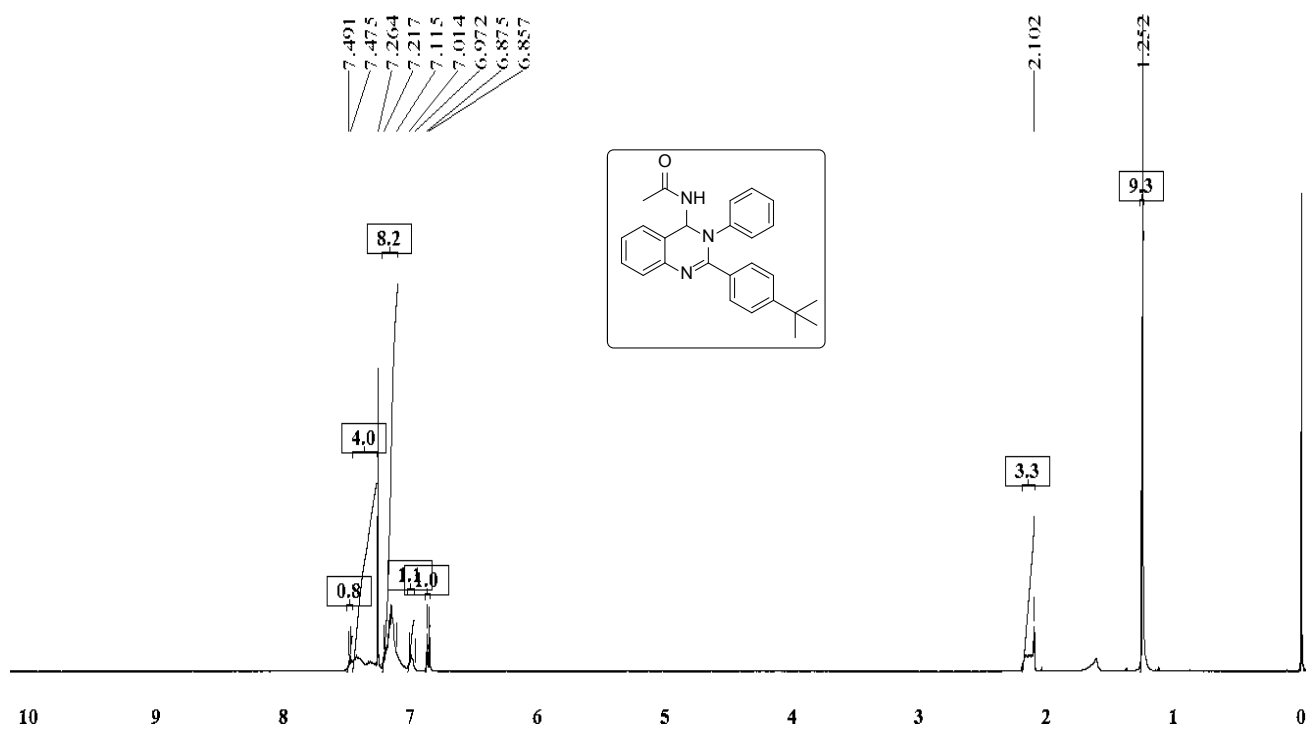

**<sup>13</sup>C NMR (75 MHz, CDCl<sub>3</sub>): (Table 2, 5t)**

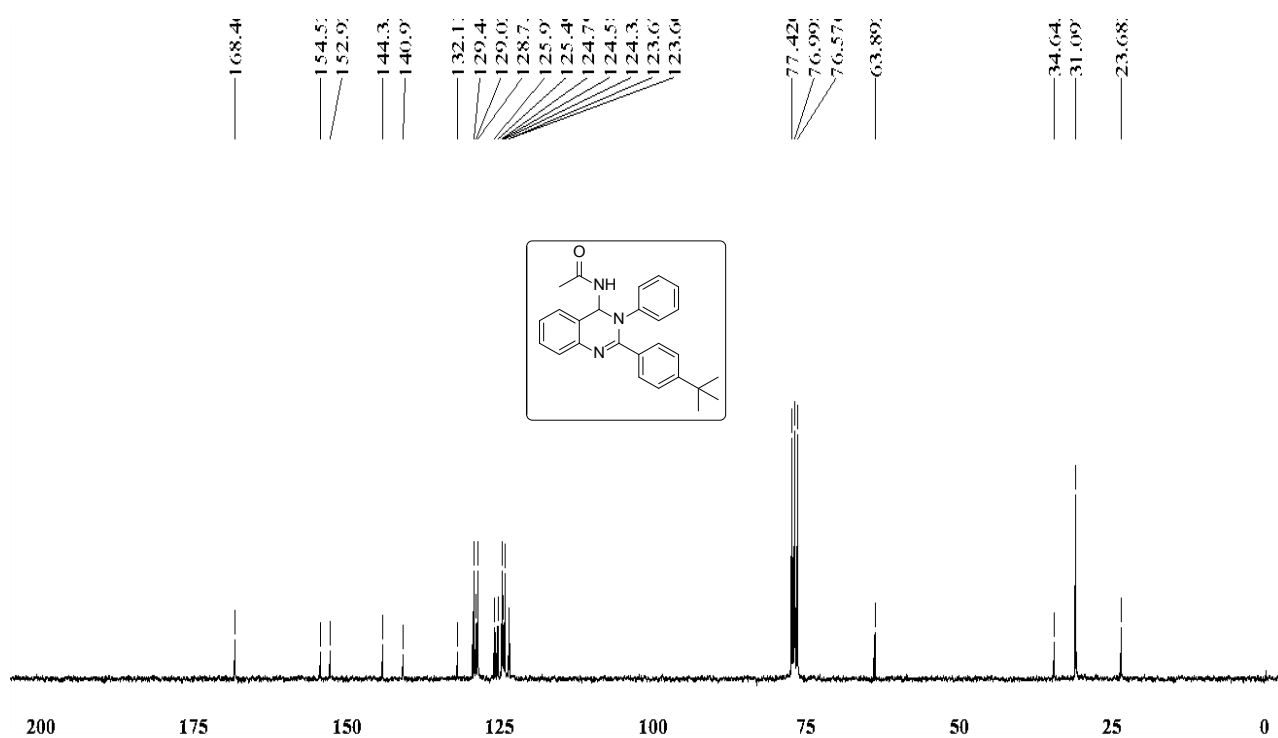



# HIGH RESOLUTION MASS SPECTRA: (Table 2, 5t)

National Centre for Mass Spectrometry  
CSIR-Indian Institute of Chemical Technology

File Name C:\ICT-HRMS\31\_12\_2013\KRR-SAI-80

Sample Name

Sample ID G-SAIDULU

Date and Time 01-01-14 02:30:39

KRR-SAI-80#3-98 RT: 0.03-0.34 AV: 96 NL: 197E8

T: FTMS (1,1) + p ESI Full ms [100.00-2000.00]

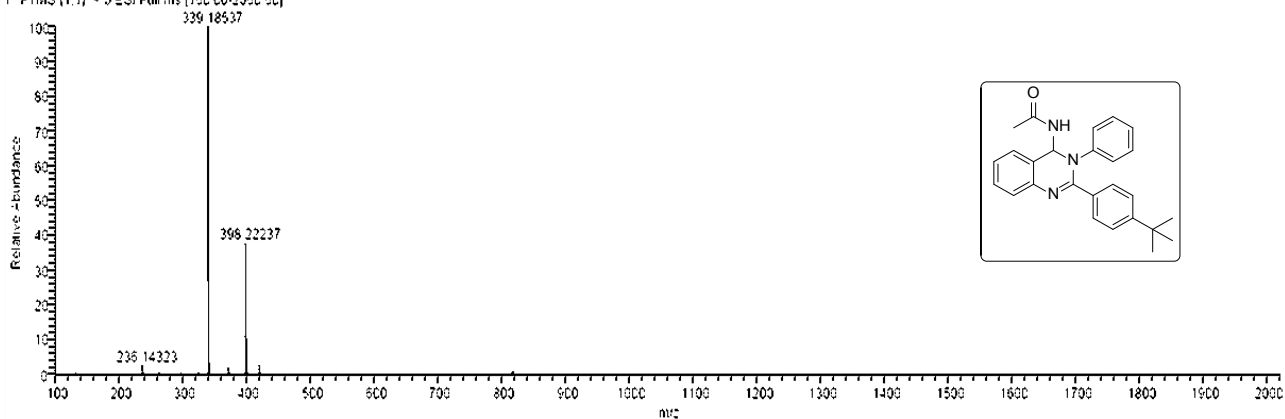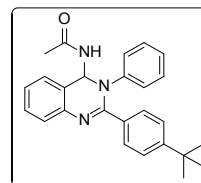

KRR-SAI-80#8-30 RT: 0.03-0.11 AV: 23

T: FTMS (1,1) + p ESI Full ms [100.00-2000.00]

| m/z       | Intensity   | Relative | Theo. Mass | Delta | RDB    | Composition                                                   |
|-----------|-------------|----------|------------|-------|--------|---------------------------------------------------------------|
|           |             |          |            | (ppm) | equiv. |                                                               |
| 339.18534 | 330307648.0 | 100.00   |            |       |        |                                                               |
| 398.22237 | 114875960.0 | 34.78    | 398.22269  | -0.81 | 14.5   | C <sub>26</sub> H <sub>28</sub> O <sub>2</sub> N <sub>2</sub> |

**<sup>1</sup>H NMR (300 MHz, CDCl<sub>3</sub>): (Table 2, 5u)**

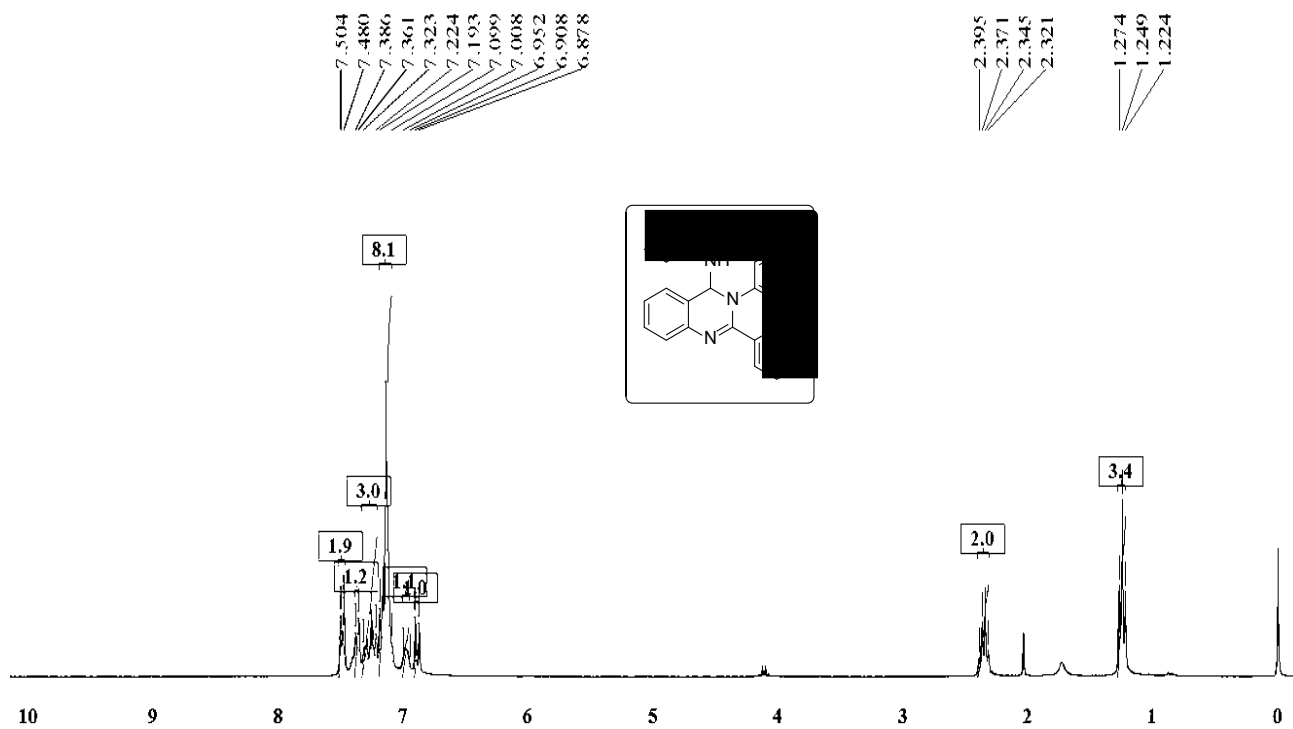

**<sup>13</sup>C NMR (125 MHz, CDCl<sub>3</sub>): (Table 2, 5u)**

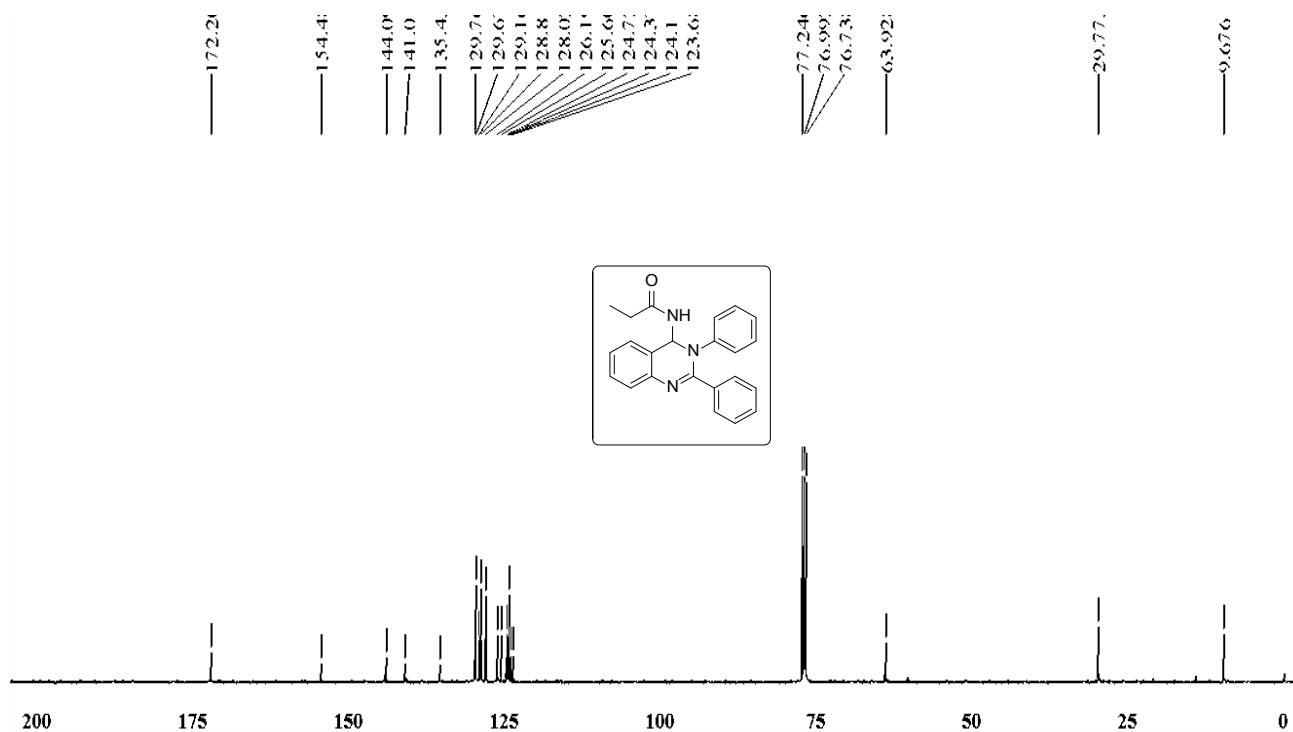

# HIGH RESOLUTION MASS SPECTRA: (Table 2, 5u)

National Centre for Mass Spectrometry  
 CSIR-Indian Institute of Chemical Technology

File Name C:\IIC-T-HRMS\10.03.2014\KRR-SAI-70  
 Sample Name G SAIDULU  
 Sample ID 1  
 Date and Time 10-03-14 21:17:30

KRR-SAI-70#8-30 RT: 0.02-0.30 AV: 63 SB 327 C 20:1.60 NL: 1.70E2  
 T: FTMS (1,1) + p ESI Full ms [100.00-2000.00]

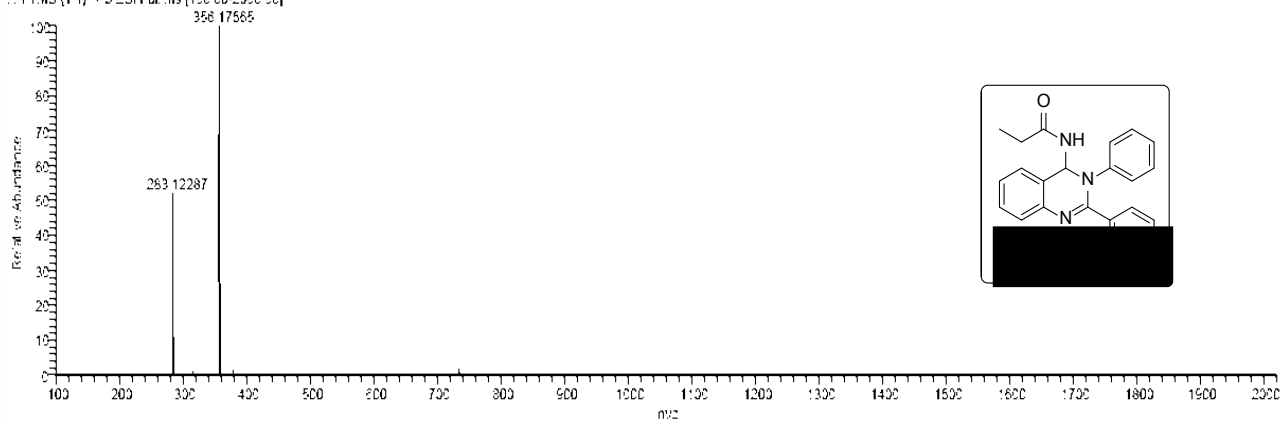

KRR-SAI-70#8-30 RT: 0.03-0.11 AV: 23

T: FTMS (1,1) + p ESI Full ms [100.00-2000.00]

| m/z       | Intensity   | Relative | Theo. Mass | Delta (ppm) | RDB equiv. | Composition                                                 |
|-----------|-------------|----------|------------|-------------|------------|-------------------------------------------------------------|
| 356.17561 | 224874336.0 | 100.00   | 356.17574  | -0.35       | 14.5       | C <sub>23</sub> H <sub>22</sub> O <sub>N</sub> <sub>3</sub> |

<sup>1</sup>H NMR (500 MHz, CDCl<sub>3</sub>): (Table 3, 7a)

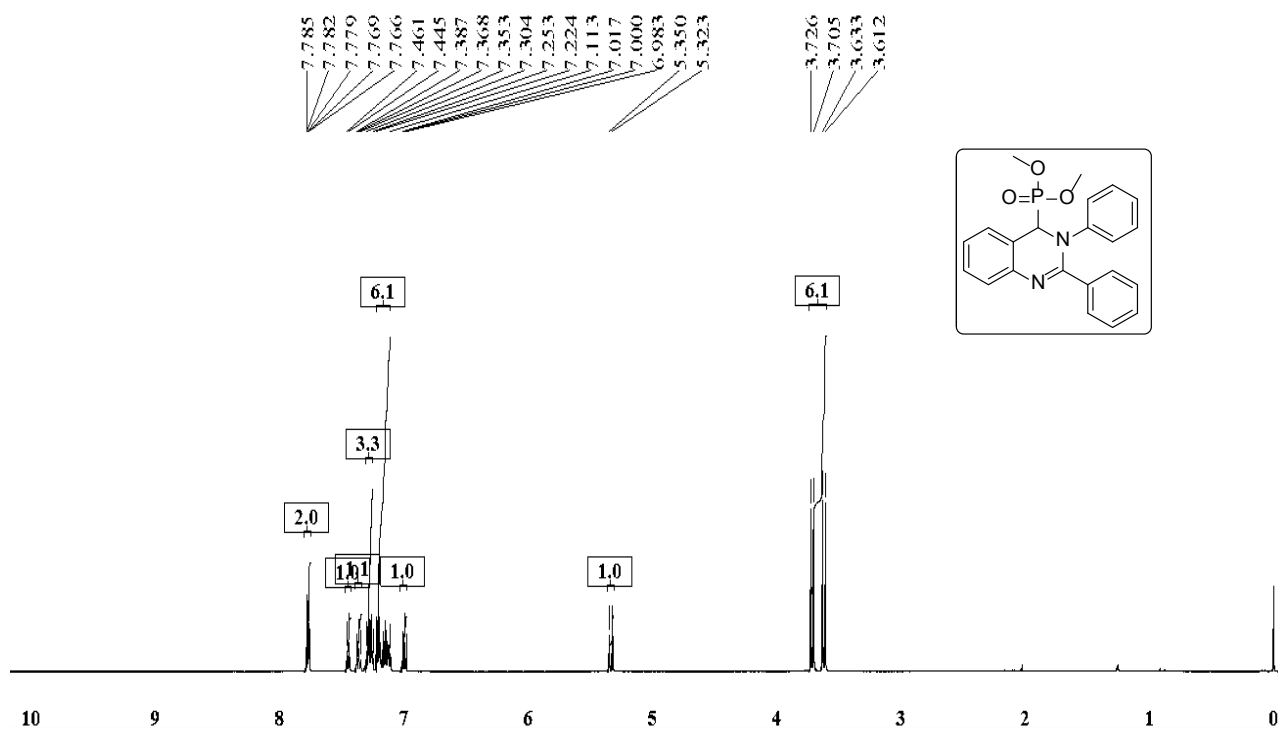

<sup>13</sup>C NMR (125 MHz, CDCl<sub>3</sub>): (Table 3, 7a)

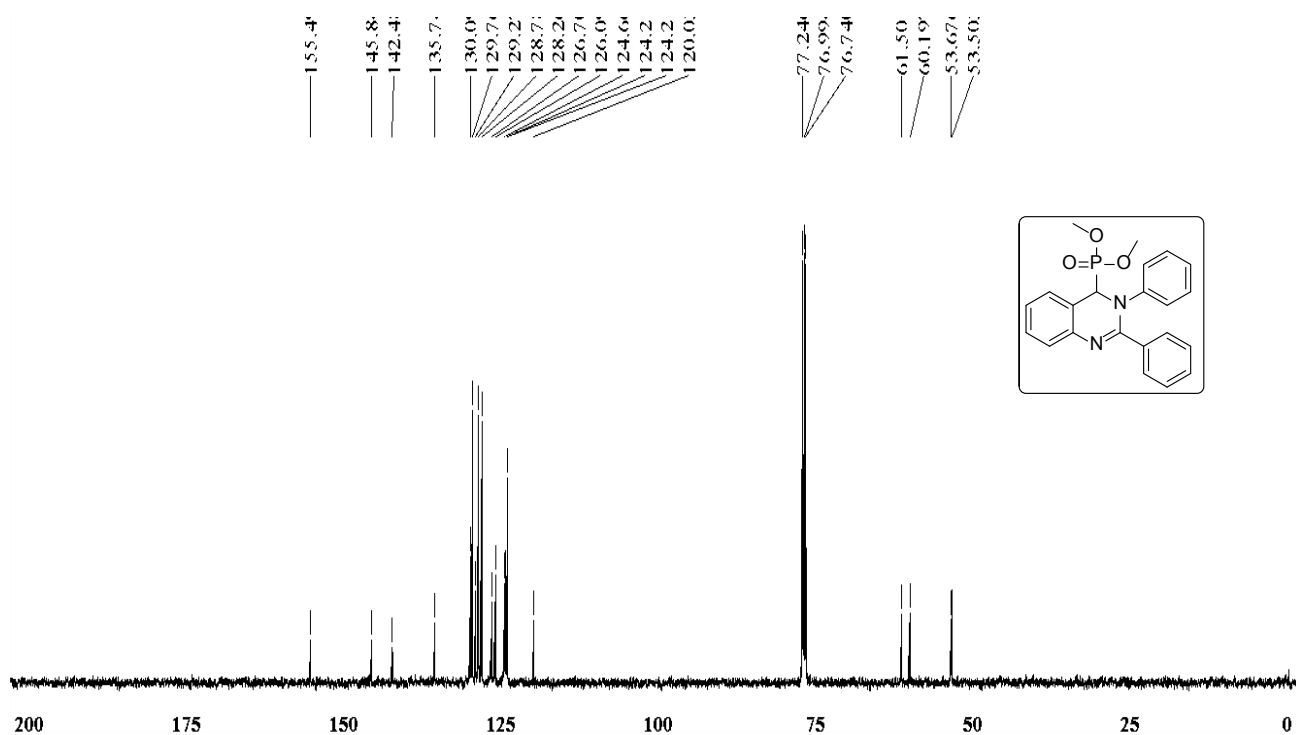

# HIGH RESOLUTION MASS SPECTRA: (Table 3, 7a)

National Centre for Mass Spectrometry  
CSIR-Indian Institute of Chemical Technology

File Name C:\ICT-HRMS\31\_12\_2013\KRR-SAI-41

Sample Name

Sample ID G-SAIDULU

Date and Time 01-01-14 02:46:05

KRR-SAI-41#8-30 RT: 0.03-0.10 AV: 23

T: FTMS (1,1) + p ESI Full ms [100.00-2000.00]

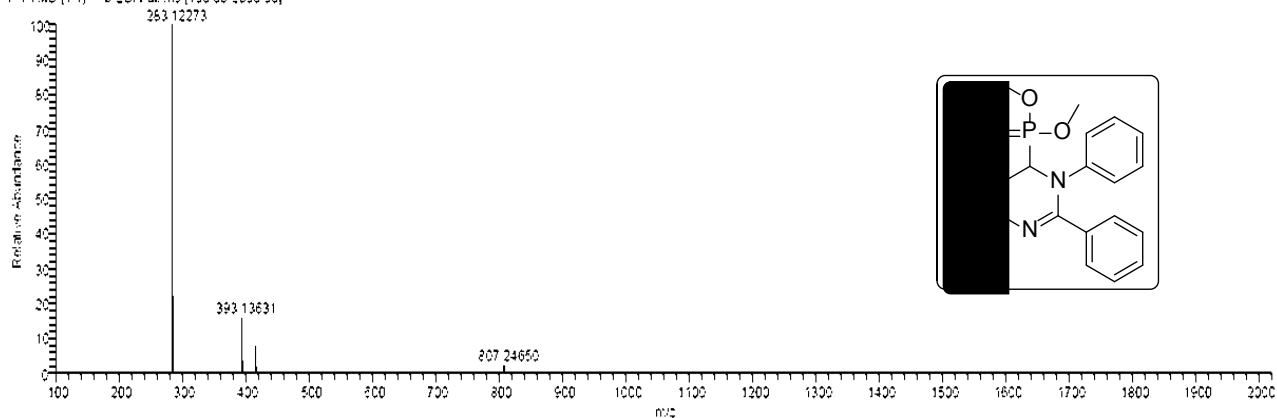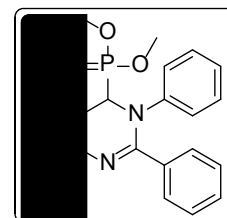

KRR-SAI-41#8-30 RT: 0.03-0.10 AV: 23

T: FTMS (1,1) + p ESI Full ms [100.00-2000.00]

m/z = 364.10-470.14

| m/z       | Intensity  | Relative | Theo. Mass | Delta | RDB    | Composition                                                       |
|-----------|------------|----------|------------|-------|--------|-------------------------------------------------------------------|
|           |            |          |            | (ppm) | equiv. |                                                                   |
| 393.13627 | 60560948.0 | 100.00   | 393.13626  | 0.05  | 13.5   | C <sub>22</sub> H <sub>22</sub> O <sub>3</sub> N <sub>2</sub> P   |
| 415.11772 | 54026884.0 | 89.21    | 415.11820  | -1.16 | 13.5   | C <sub>22</sub> H <sub>21</sub> O <sub>3</sub> N <sub>2</sub> NaP |

## <sup>31</sup>P NMR (202 MHz, CDCl<sub>3</sub>): (Table 3, 7a)

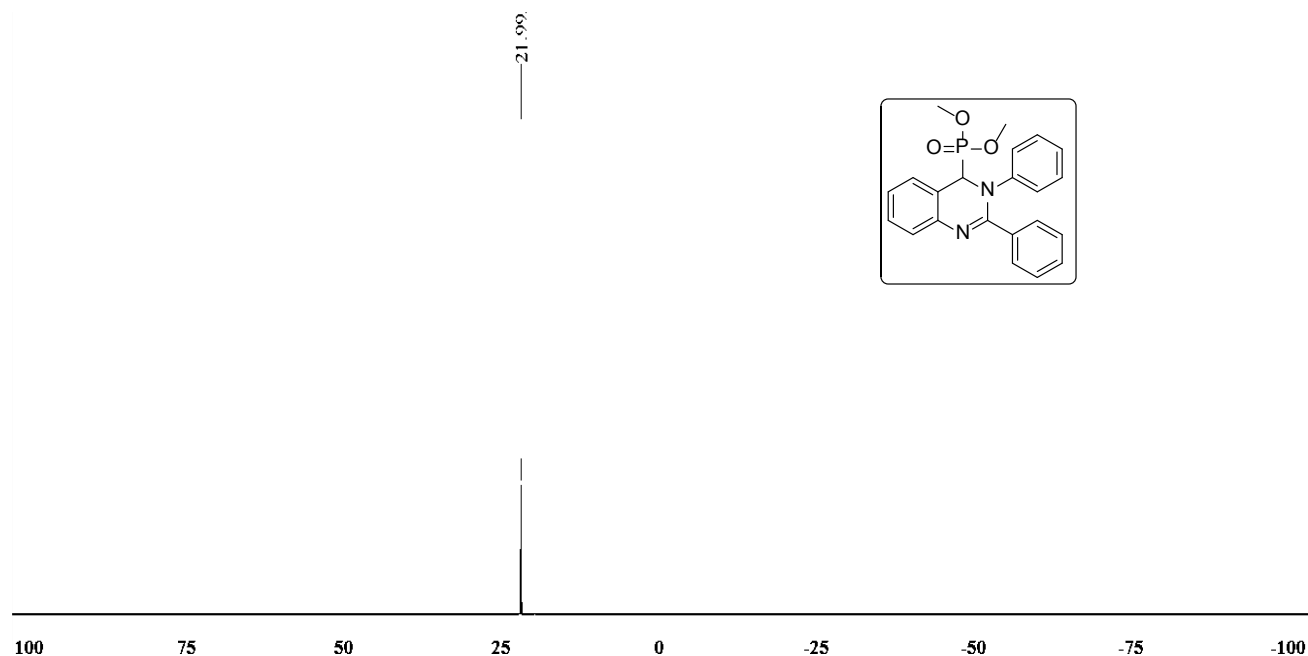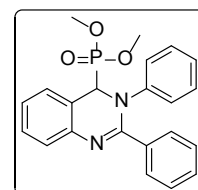

<sup>1</sup>H NMR (300 MHz, CDCl<sub>3</sub>): (Table 3, 7b)

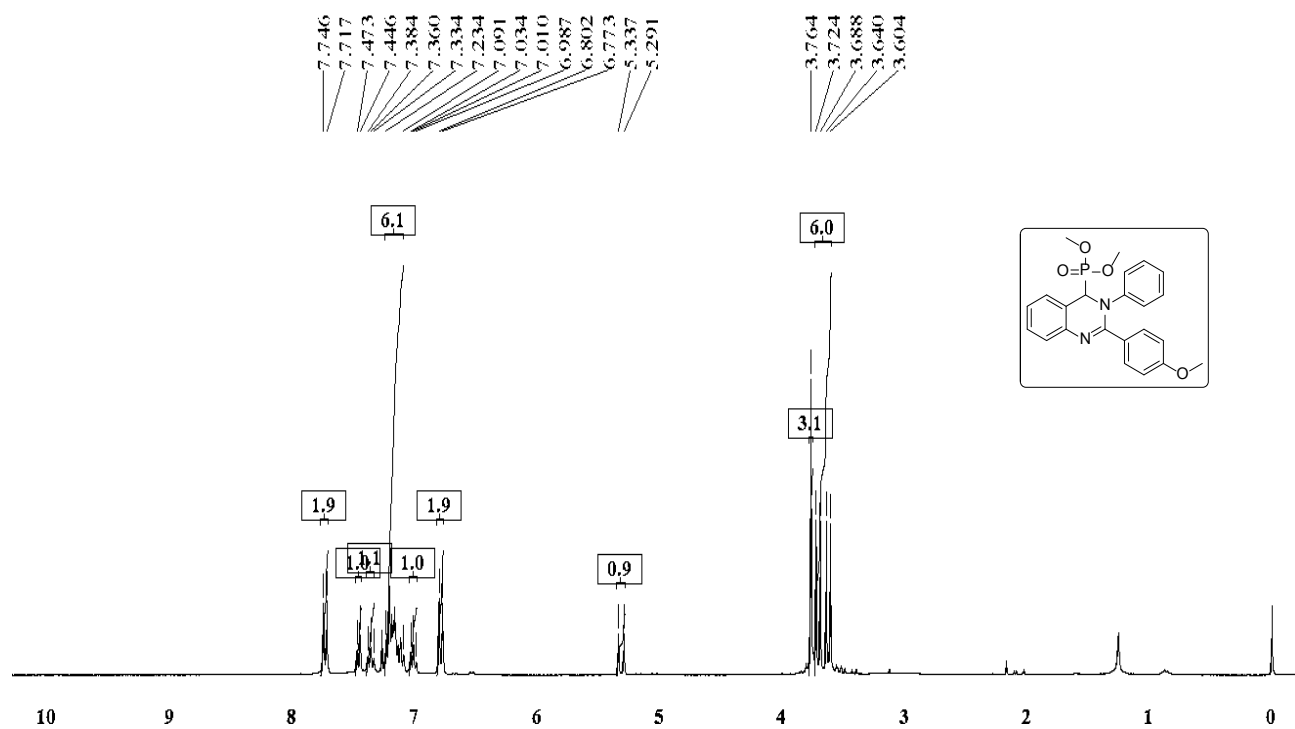

<sup>13</sup>C NMR (125 MHz, CDCl<sub>3</sub>): (Table 3, 7b)

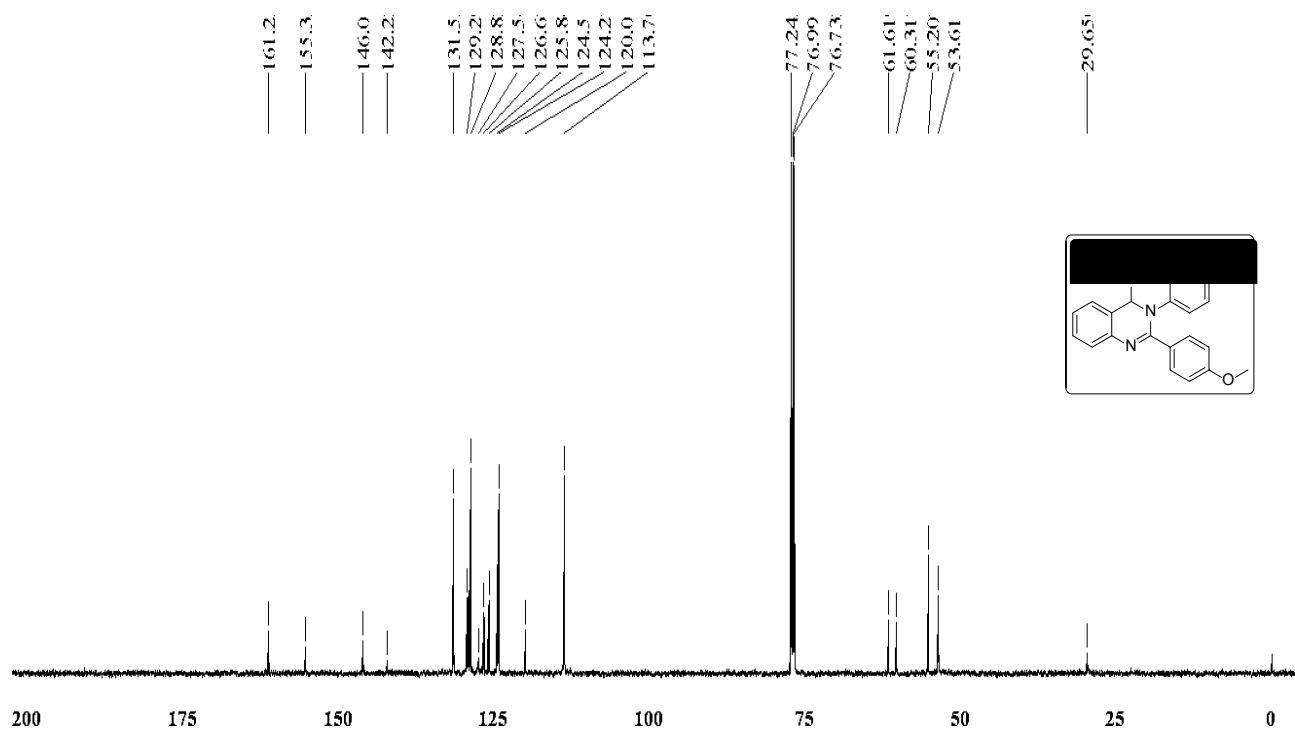

# HIGH RESOLUTION MASS SPECTRA: (Table 3, 7b)

National Centre for Mass Spectrometry  
CSIR-Indian Institute of Chemical Technology

File Name C:\ICT-HRMS-16.01.2014 KRR-SAI-96

Sample Name

Sample ID G SAIDULU

Date and Time 16-01-14 17:15:13

KRR-SAI-96#28-36 RT: 0.09-0.13 AV: 13 NL: 3 2258

T: FTMS (1.1) + p ESI Full ms (100.00-2000.00)

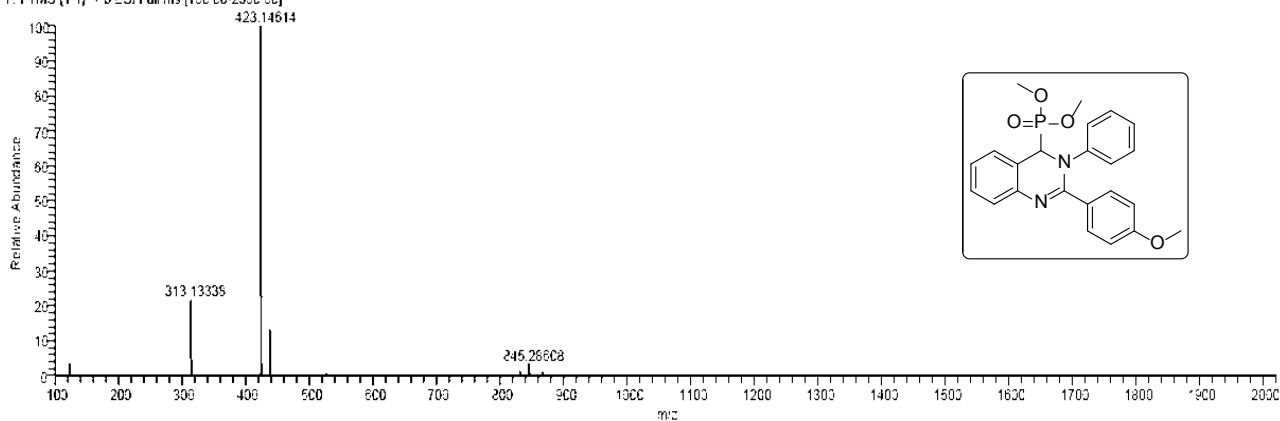

KRR-SAI-96#8-30 RT: 0.03-0.10 AV: 23

T: FTMS (1.1) + p ESI Full ms (100.00-2000.00)

| m/z       | Intensity   | Relative | Theo. Mass | Delta (ppm) | RDB equiv. | Composition                                                     |
|-----------|-------------|----------|------------|-------------|------------|-----------------------------------------------------------------|
| 423.14615 | 256755584.0 | 100.00   | 423.14682  | -1.59       | 13.5       | C <sub>23</sub> H <sub>24</sub> O <sub>4</sub> N <sub>2</sub> P |
| 424.14940 | 60567468.0  | 23.59    |            |             |            |                                                                 |

## <sup>31</sup>P NMR (202 MHz, CDCl<sub>3</sub>): (Table 3, 7b)

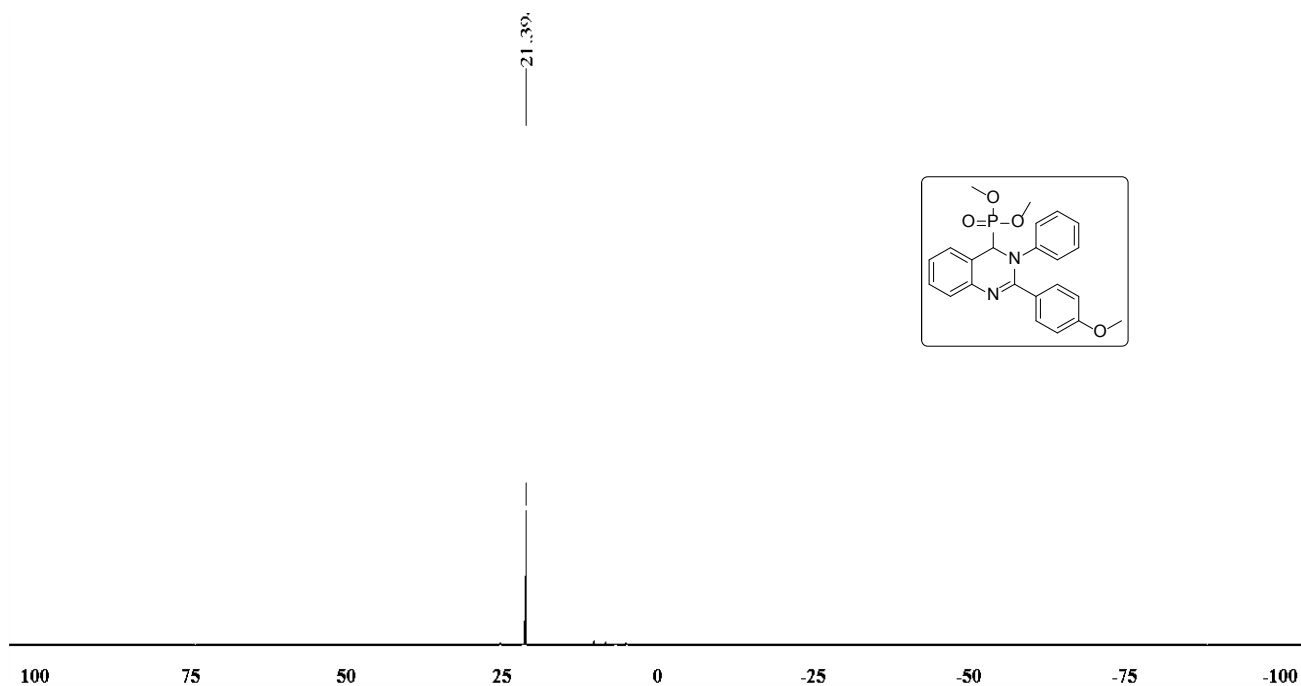

**<sup>1</sup>H NMR (300 MHz, CDCl<sub>3</sub>): (Table 3, 7c)**

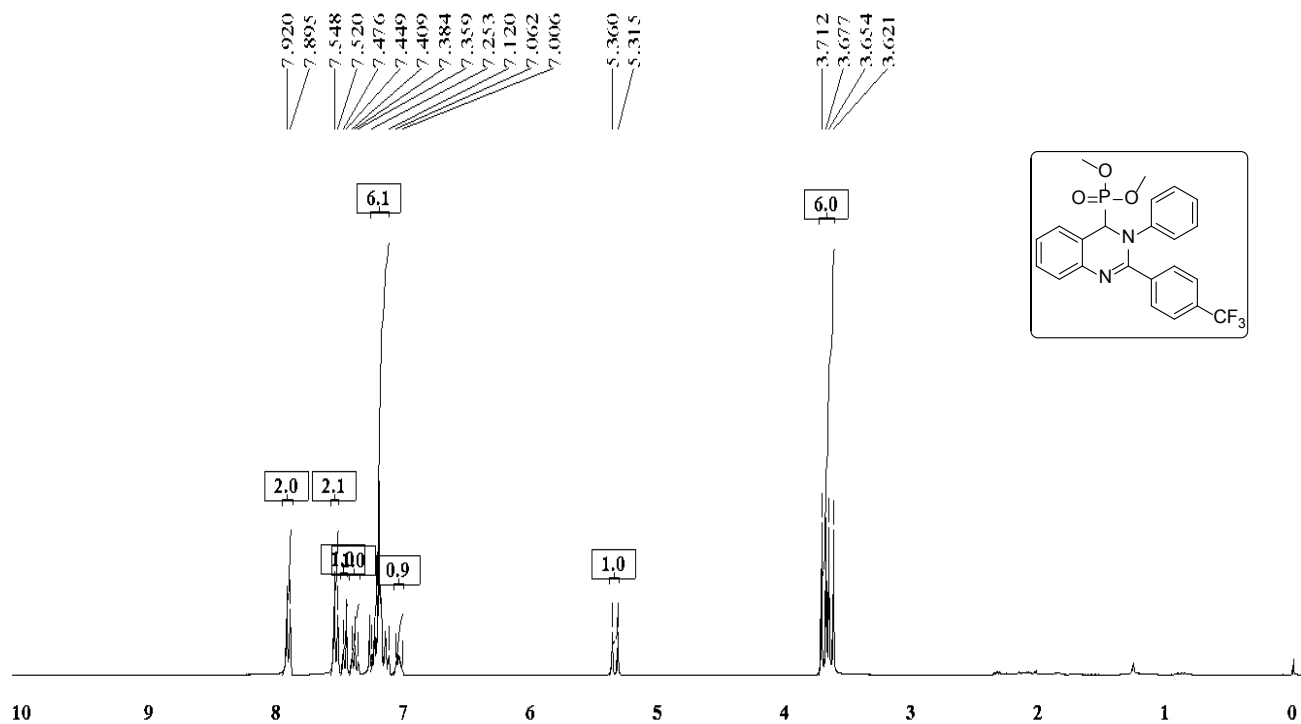

**<sup>13</sup>C NMR (75 MHz, CDCl<sub>3</sub>): (Table 3, 7c)**

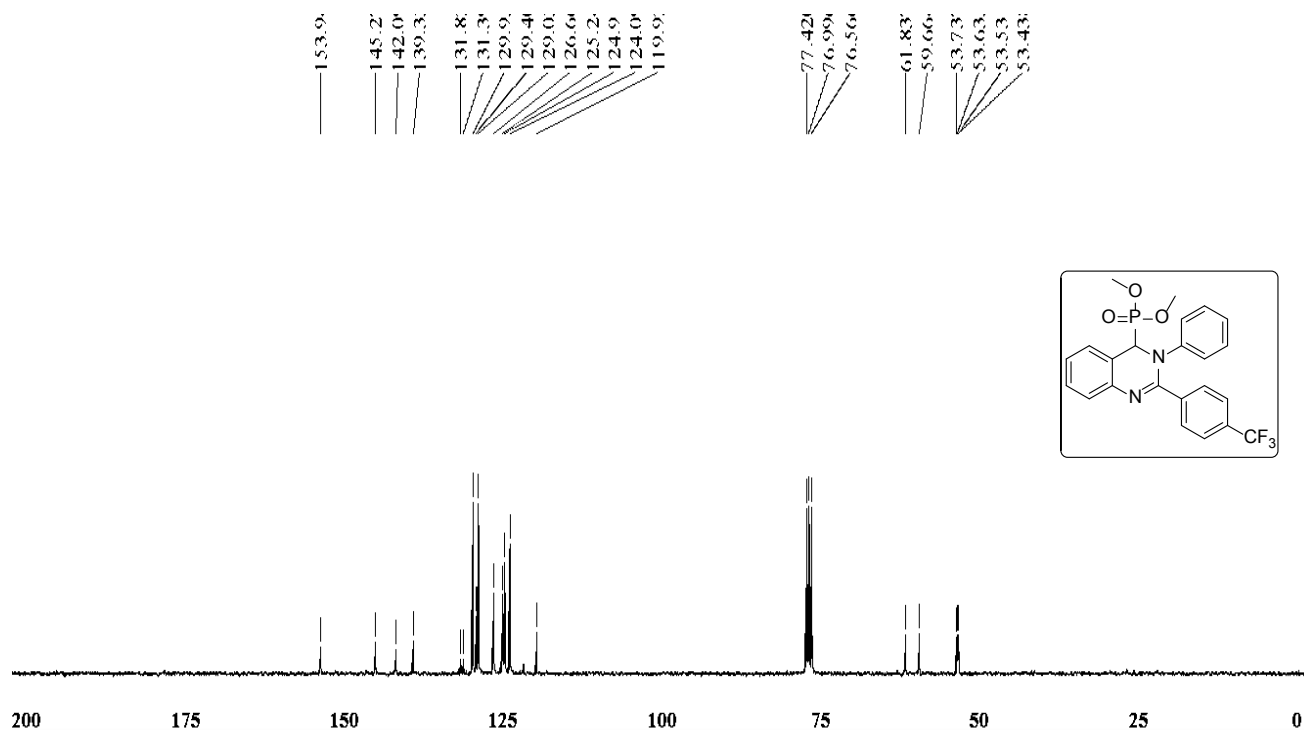



# HIGH RESOLUTION MASS SPECTRA: (Table 3, 7c)

National Centre for Mass Spectrometry  
CSIR-Indian Institute of Chemical Technology

File Name C:\IICT-HRMS\16.01.2014-KRR-SAI-87

Sample Name

Sample ID G SAIDULU

Date and Time 16-01-14 16:54:21

KRR-SAI-87#8-107 RT: 0.02-0.36 AV: 192 SB: 222.099-194 NL: 2.98E8

T: FTMS (1.1) + p ESI Full ms [100.00-2000.00]

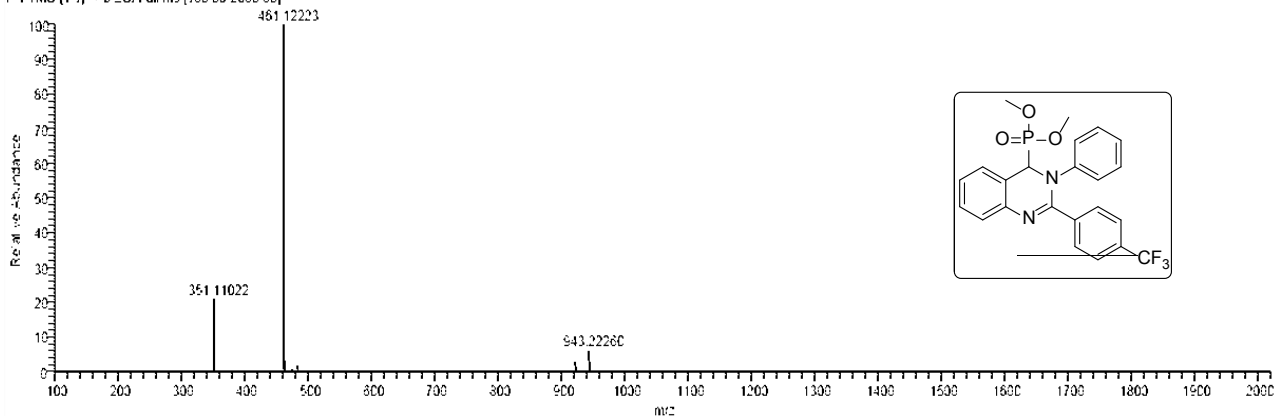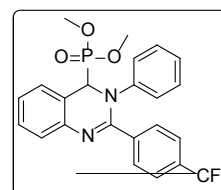

KRR-SAI-87#8-30 RT: 0.03-0.10 AV: 23

T: FTMS (1.1) + p ESI Full ms [100.00-2000.00]

| m/z       | Intensity   | Relative | Theo. Mass | Delta | RDB    | Composition                                                                    |
|-----------|-------------|----------|------------|-------|--------|--------------------------------------------------------------------------------|
|           |             |          |            | (ppm) | equiv. |                                                                                |
| 461.12219 | 357058752.0 | 100.00   | 461.12364  | -3.14 | 13.5   | C <sub>23</sub> H <sub>21</sub> O <sub>3</sub> N <sub>2</sub> F <sub>3</sub> P |
| 462.12617 | 80502408.0  | 22.55    |            |       |        |                                                                                |

## <sup>31</sup>P NMR (202 MHz, CDCl<sub>3</sub>): (Table 3, 7c)

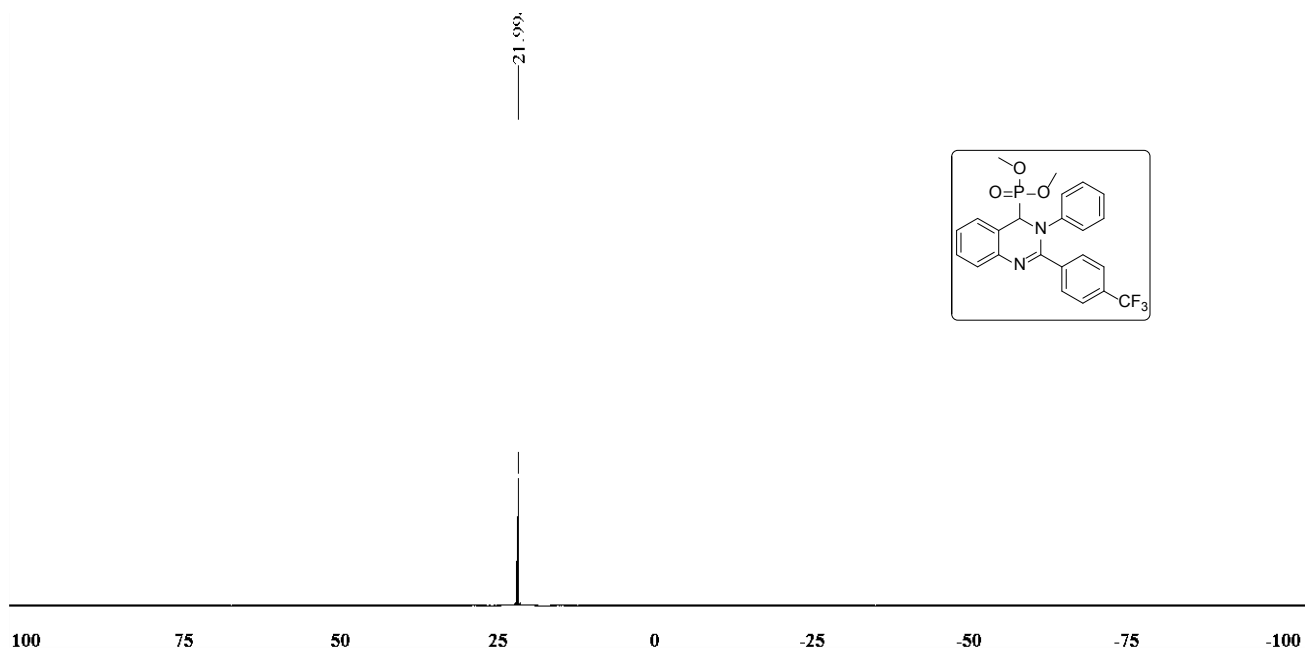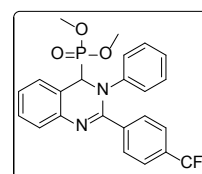

**<sup>1</sup>H NMR (300 MHz, CDCl<sub>3</sub>): (Table 3, 7d)**

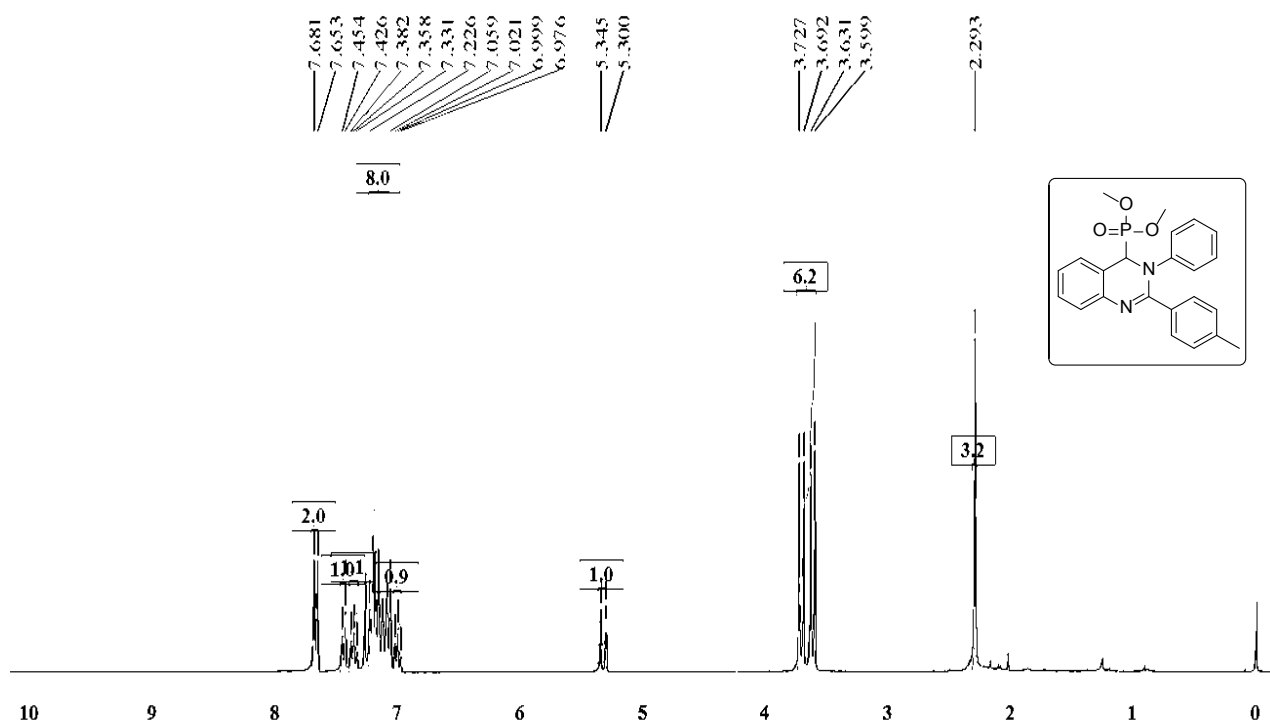

**<sup>13</sup>C NMR (125 MHz, CDCl<sub>3</sub>): (Table 3, 7d)**

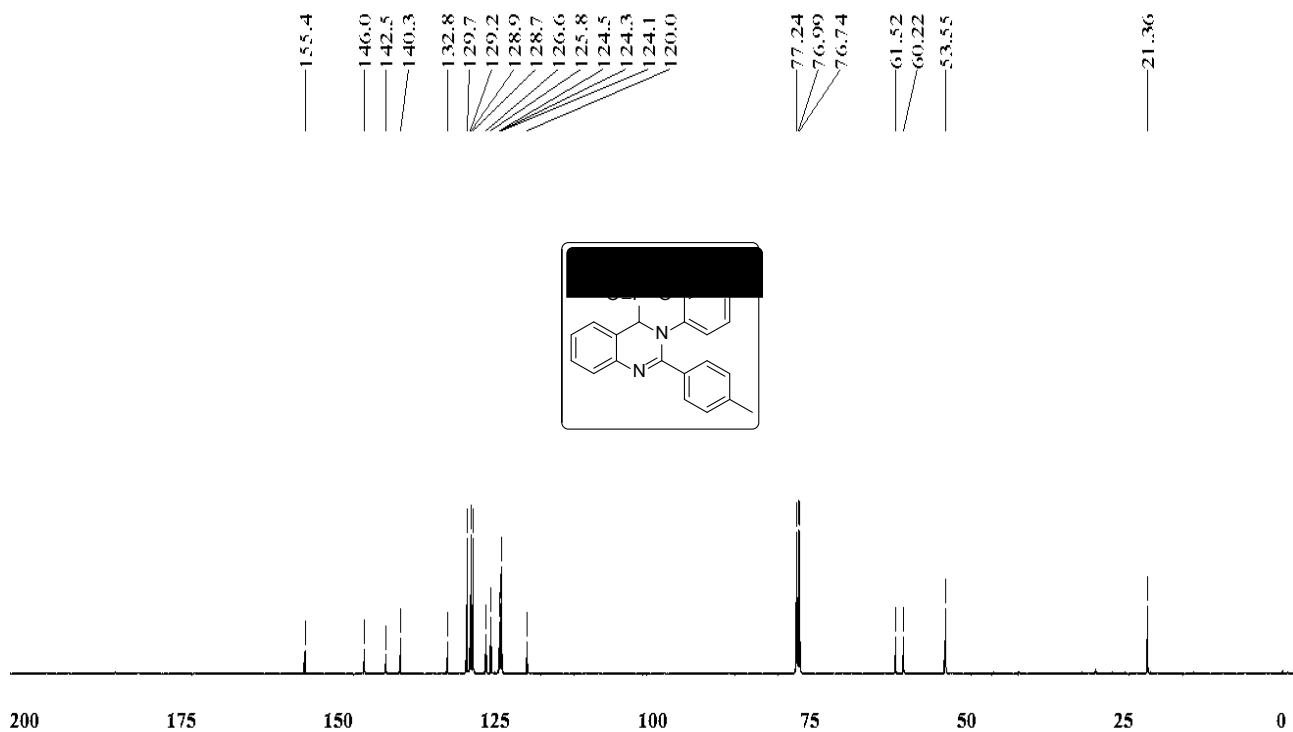

# HIGH RESOLUTION MASS SPECTRA: (Table 3, 7d)

National Centre for Mass Spectrometry  
CSIR-Indian Institute of Chemical Technology

File Name C:\IICT-HRMS\16-01-2014\KRR-SAI-86

Sample Name

Sample ID G SAIDULU

Date and Time 16-01-14 15:31:47

KRR-SAI-86 #7-106 RT 0.02-0.36 AV 192 SB: 292.099-1.94 NL 2.17E8

T FTMS (1.1) + p ESI Full ms [100.00-2000.00]

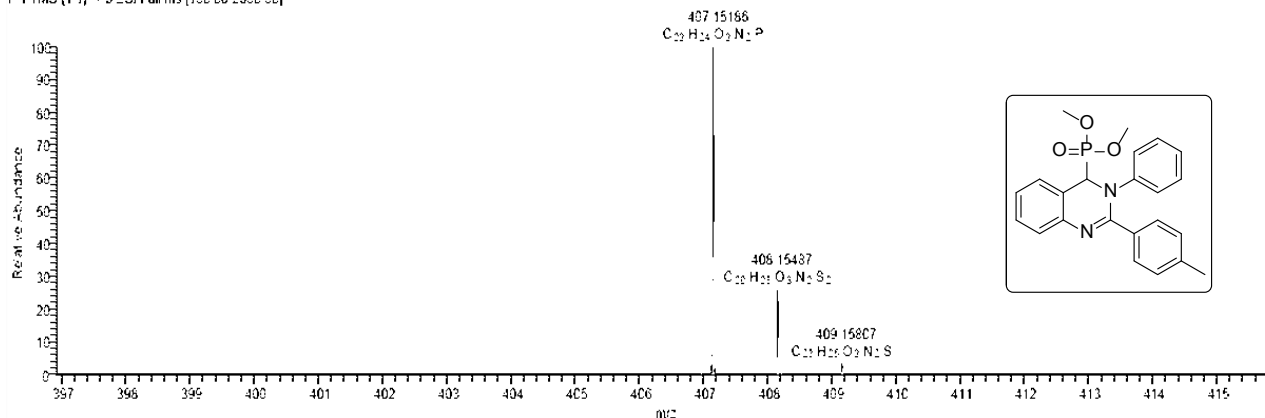

KRR-SAI-86#8-30 RT: 0.03-0.10 AV: 23

T: FTMS (1,1) + p ESI Full ms [100.00-2000.00]

| m/z       | Intensity   | Relative | Theo. Mass | Delta | RDB    | Composition |
|-----------|-------------|----------|------------|-------|--------|-------------|
|           |             |          |            | (ppm) | equiv. |             |
| 297.13862 | 104728592.0 | 29.78    |            |       |        |             |
| 407.15186 | 351704000.0 | 100.00   |            |       |        |             |

## <sup>31</sup>P NMR (202 MHz, CDCl<sub>3</sub>): (Table 3, 7d)

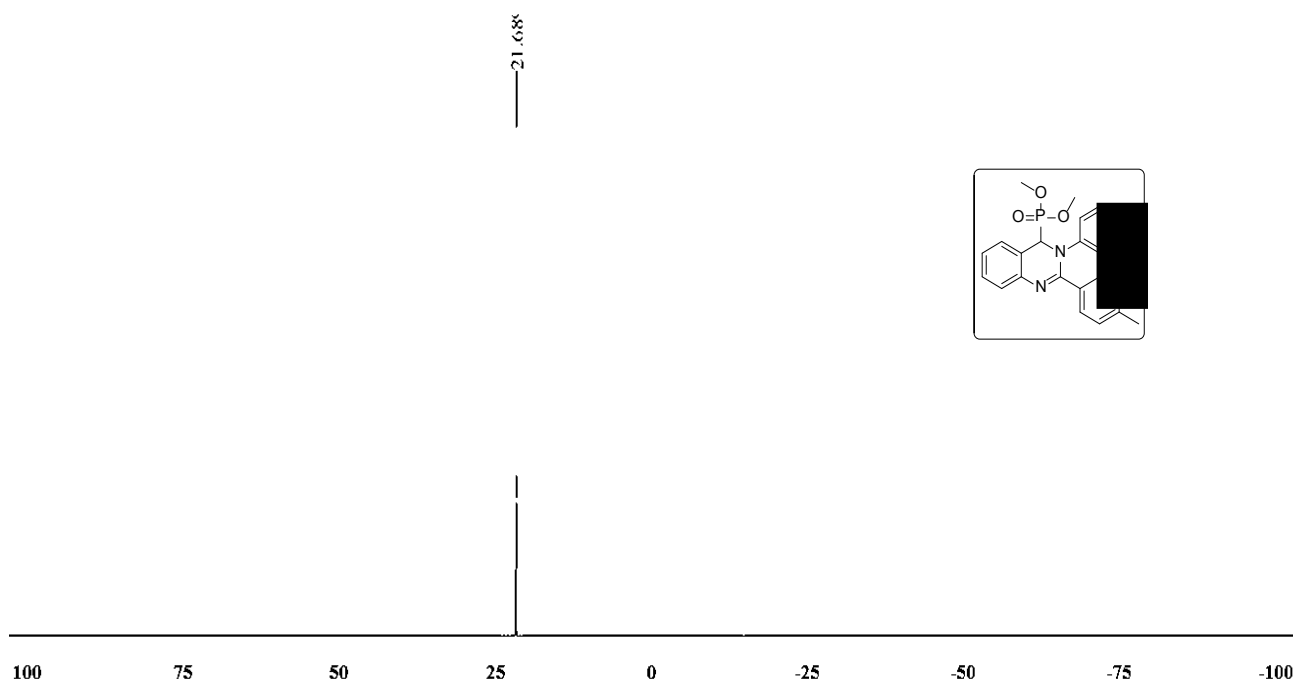

<sup>1</sup>H NMR (500 MHz, CDCl<sub>3</sub>): (Table 3, 7e)

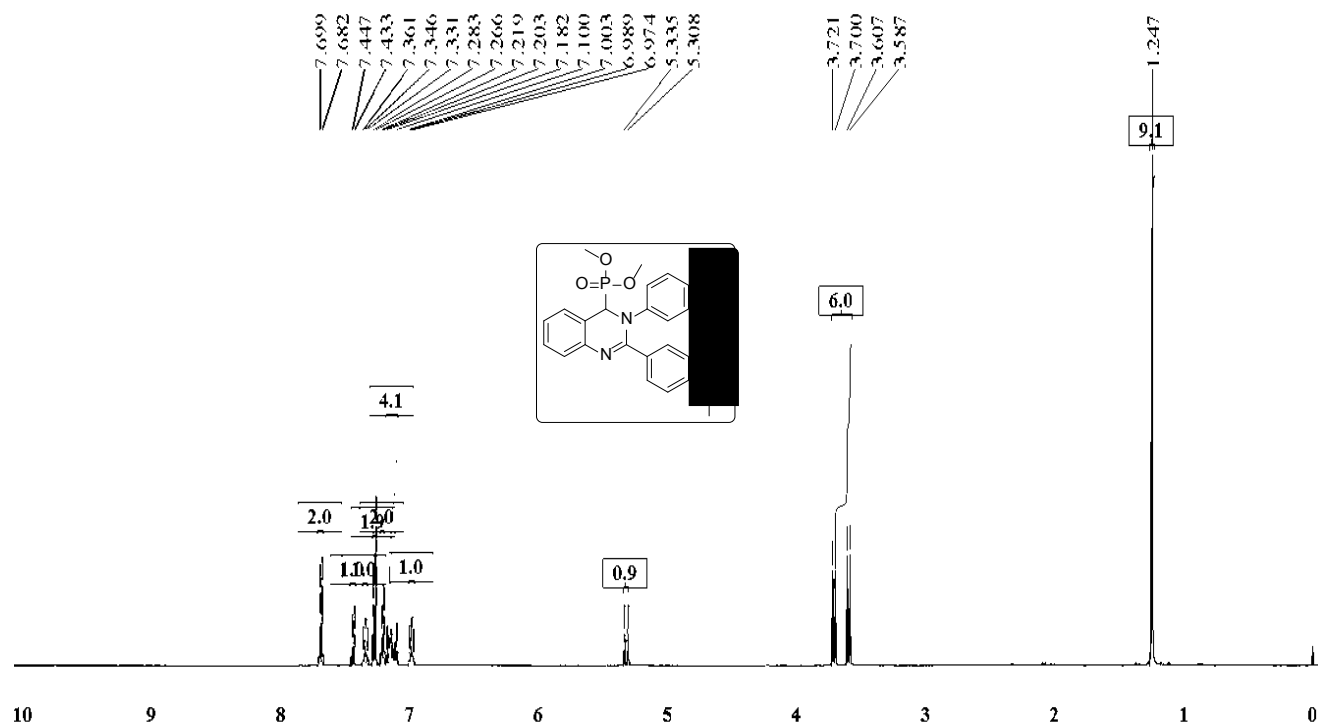

<sup>13</sup>C NMR (125 MHz, CDCl<sub>3</sub>): (Table 3, 7e)

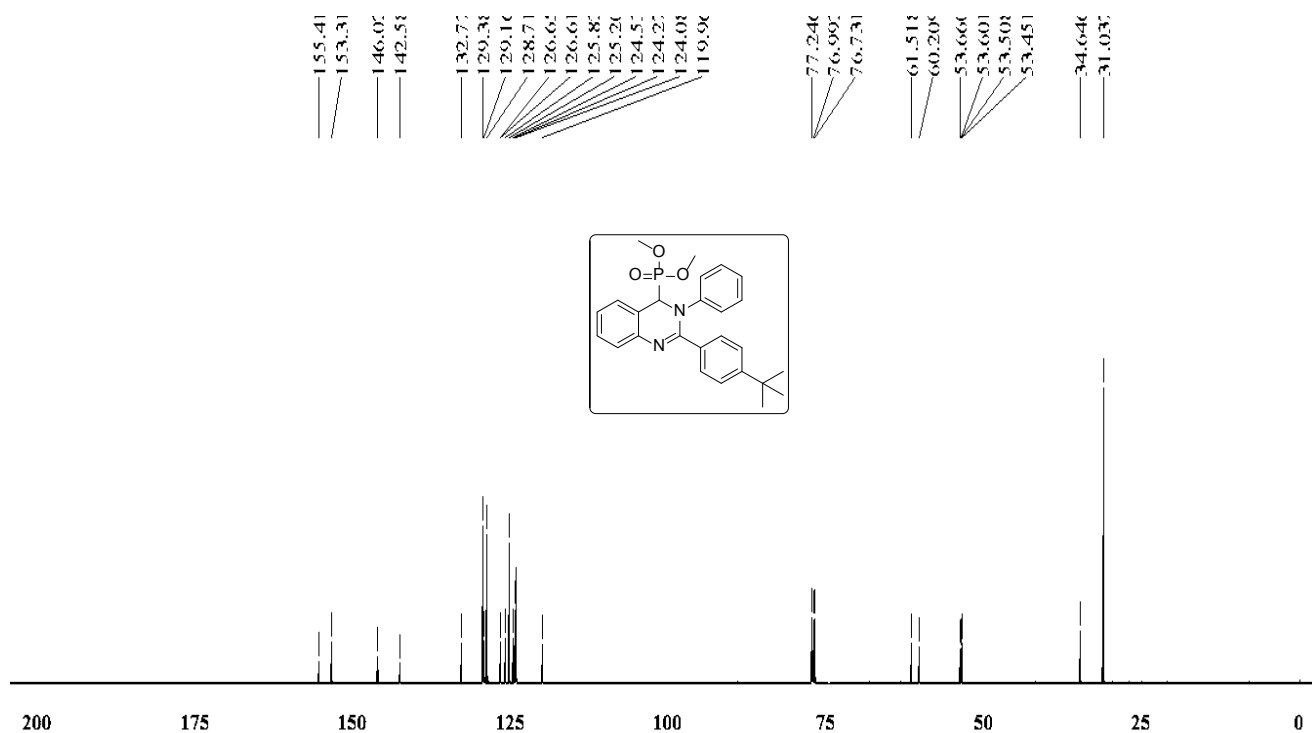

# HIGH RESOLUTION MASS SPECTRA: (Table 3, 7e)

National Centre for Mass Spectrometry  
CSIR-Indian Institute of Chemical Technology

File Name C:\ICT-HRMS-16.01.2014-KRR-SAI-91  
Sample Name  
Sample ID G SAIDULU  
Date and Time 16-01-14 17:02:10  
KRR-SAI-91#8-106 RT: 0.03-0.10 AV: 193 SB: 222 094-194 NL: 296E8  
T: FTMS (1,1) + p ESI Full ms [100.00-2000.00]

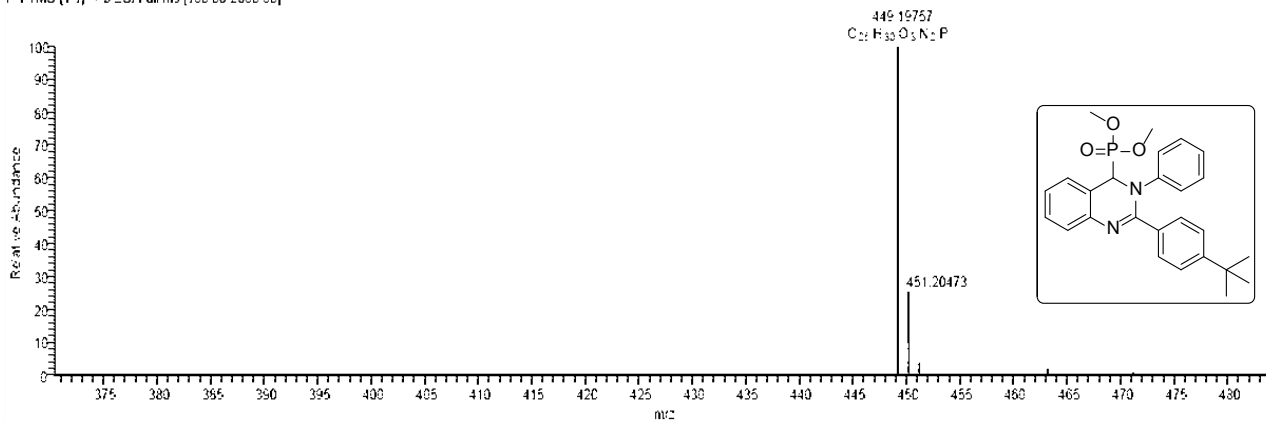

KRR-SAI-91#8-30 RT: 0.03-0.10 AV: 23

T: FTMS {1,1} + p ESI Full ms [100.00-2000.00]

| m/z       | Intensity   | Relative | Theo. Mass | Delta (ppm) | RDB equiv. | Composition |
|-----------|-------------|----------|------------|-------------|------------|-------------|
| 449.19751 | 386733952.0 | 100.00   |            |             |            |             |
| 450.20126 | 99731704.0  | 25.79    |            |             |            |             |

## <sup>31</sup>P NMR (202 MHz, CDCl<sub>3</sub>): (Table 3, 7e)

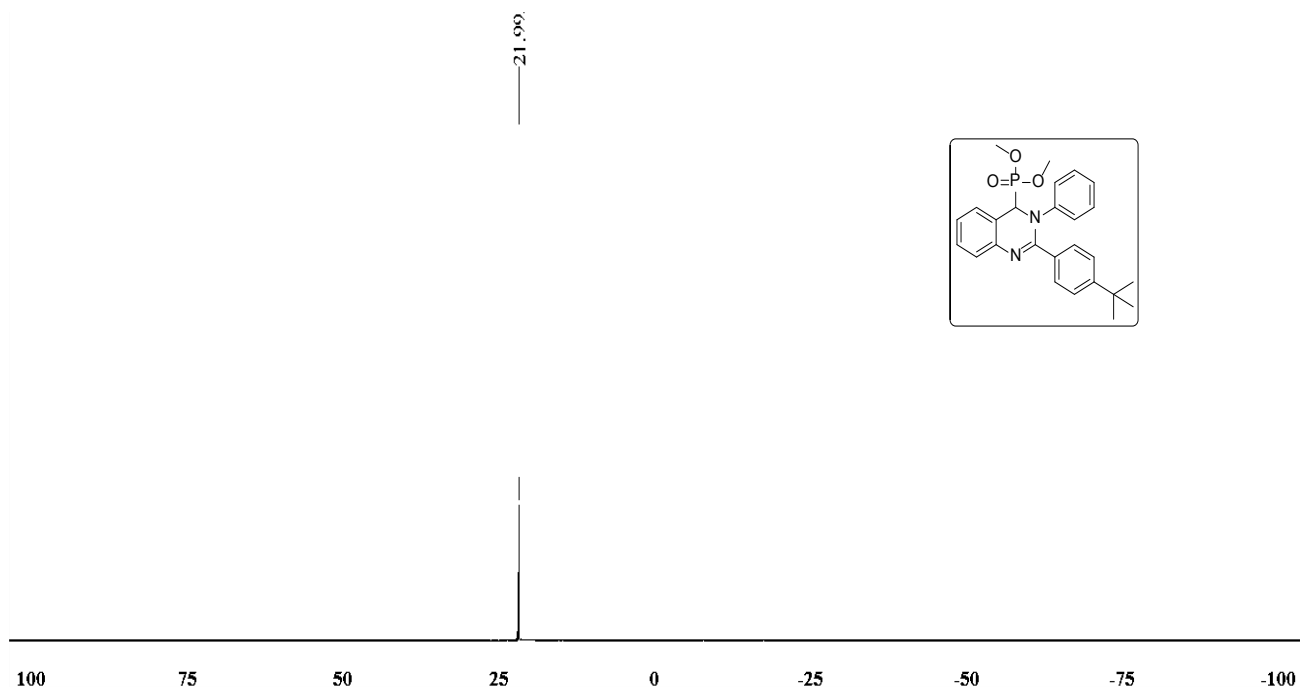

<sup>1</sup>H NMR (500 MHz, CDCl<sub>3</sub>): (Table 3, 7f)

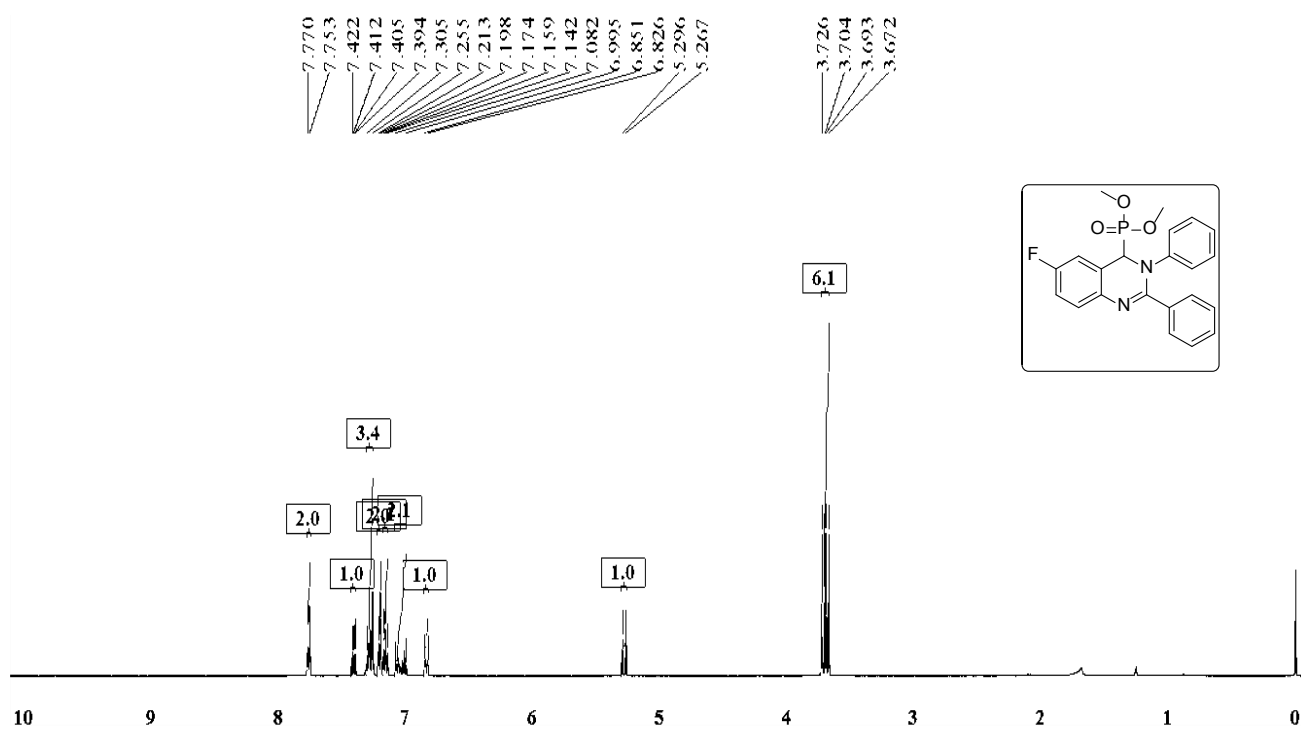

<sup>13</sup>C NMR (125 MHz, CDCl<sub>3</sub>): (Table 3, 7f)

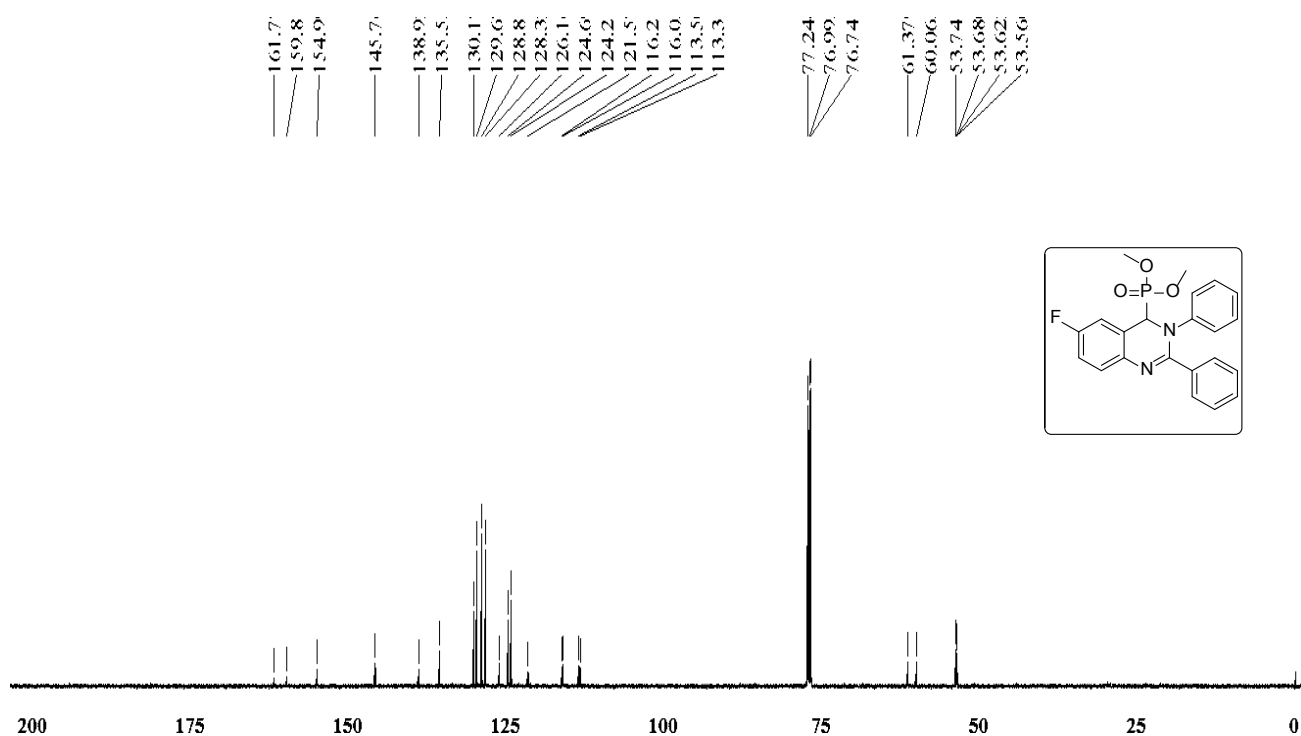

# HIGH RESOLUTION MASS SPECTRA: (Table 3, 7f)

National Centre for Mass Spectrometry  
CSIR-Indian Institute of Chemical Technology

File Name C:\ICT-HRMS-16.01.2014-KRR-SAI-92

Sample Name

Sample ID G SAIDULU

Date and Time 16-01-14 17:04:45

KRR-SAI-92#8-105 RT: 0.02-0.36 AV: 133 SB: 282 0.69-1.94 NL: 2.25E8

T: FTMS (1.1) + s ESI Full ms [100.00-2000.00]

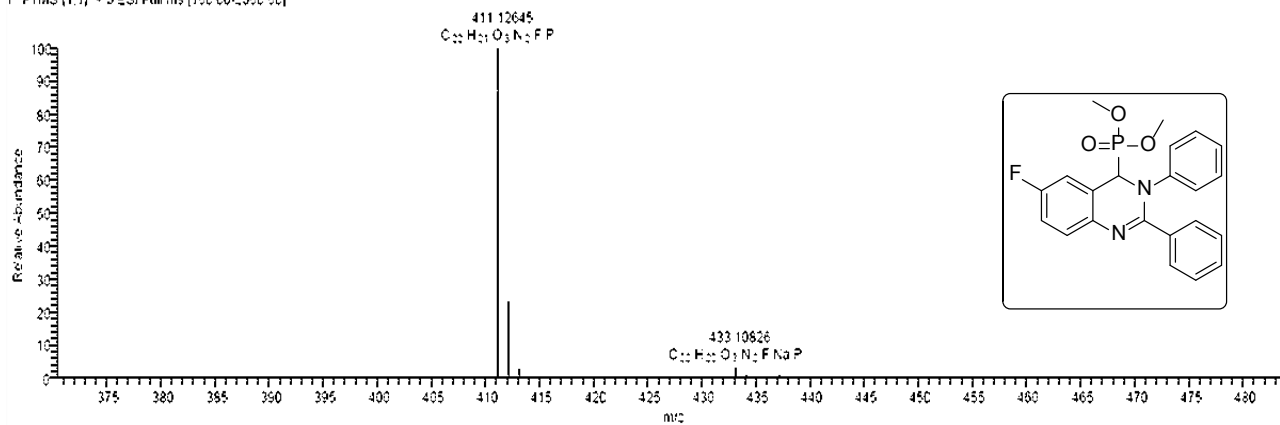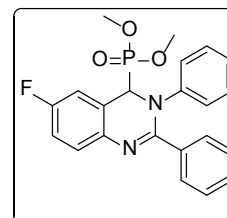

KRR-SAI-92#8-30 RT: 0.03-0.10 AV: 23

T: FTMS {1,1} + p ESI Full ms [100.00-2000.00]

| m/z       | Intensity   | Relative | Theo. Mass | Delta | RDB    | Composition |
|-----------|-------------|----------|------------|-------|--------|-------------|
|           |             |          |            | (ppm) | equiv. |             |
| 301.11343 | 105868544.0 | 34.30    |            |       |        |             |
| 411.12646 | 308653088.0 | 100.00   |            |       |        |             |

## <sup>31</sup>P NMR (202 MHz, CDCl<sub>3</sub>): (Table 3, 7f)

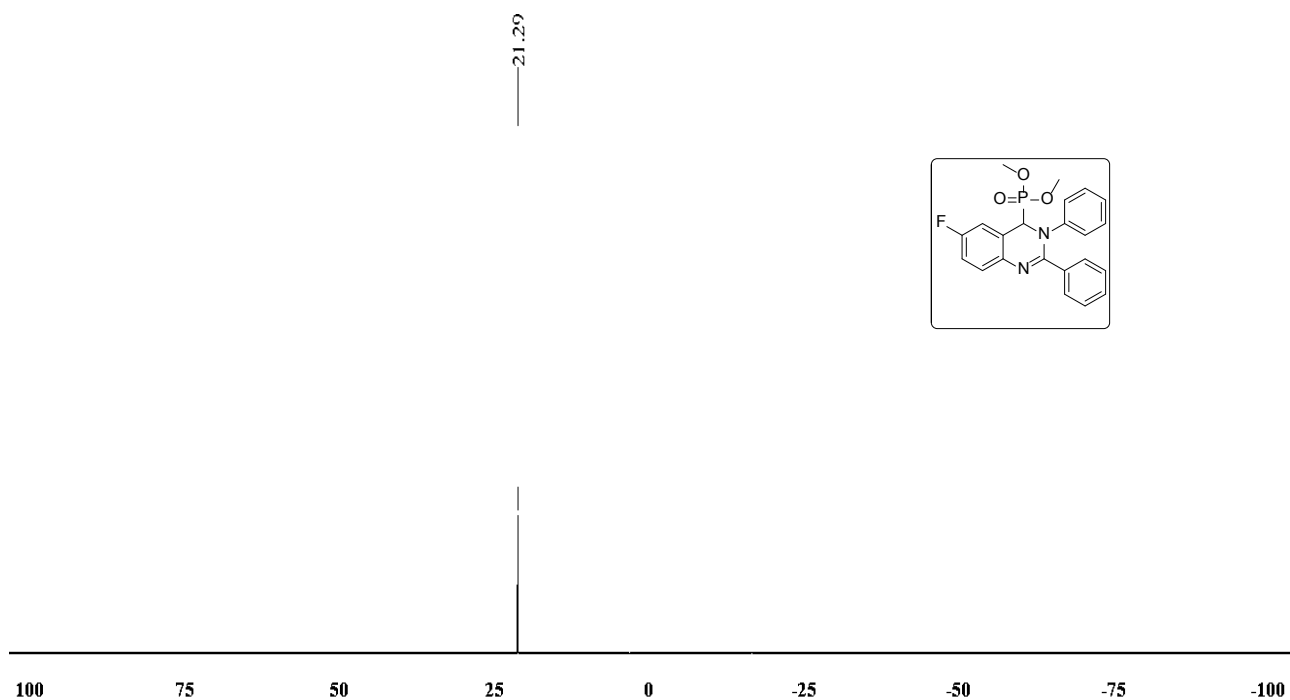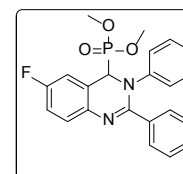

**$^1\text{H}$  NMR (500 MHz,  $\text{CDCl}_3$ ): (Table 1, 7g)**

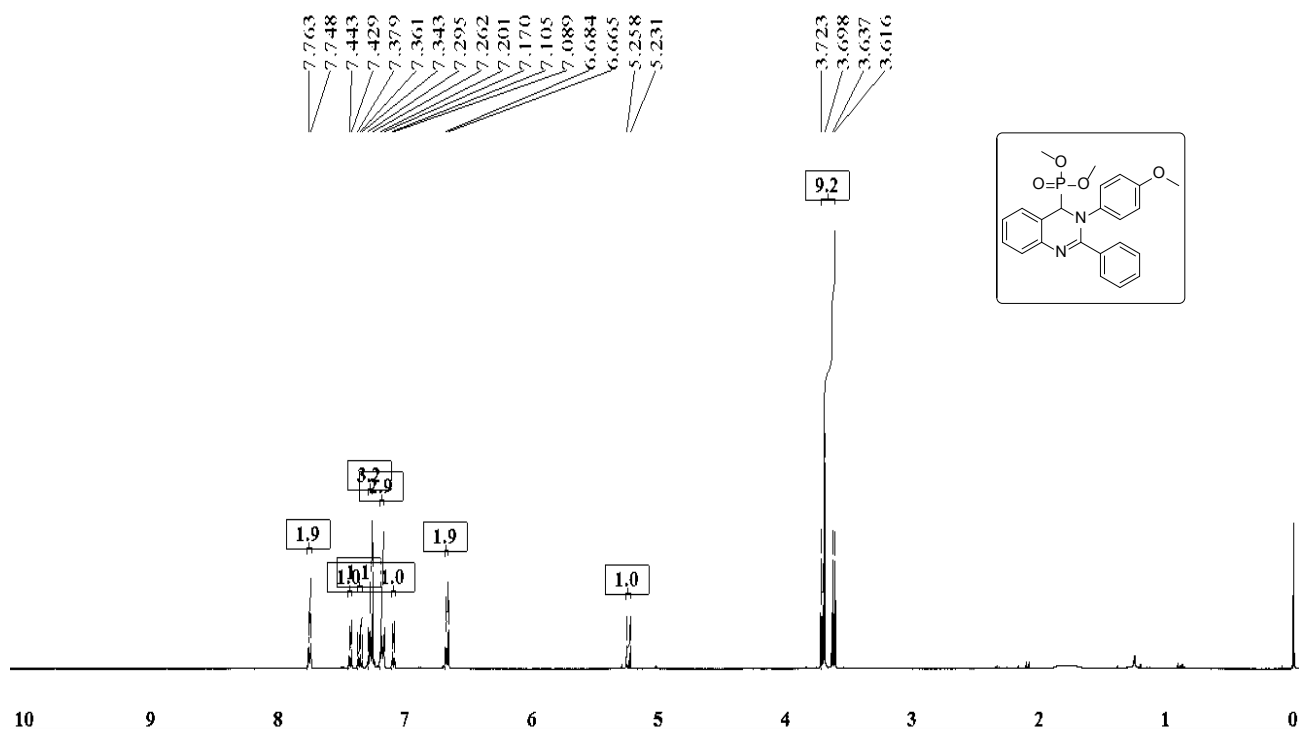

**$^{13}\text{C}$  NMR (125 MHz,  $\text{CDCl}_3$ ): (Table 1, 7g)**

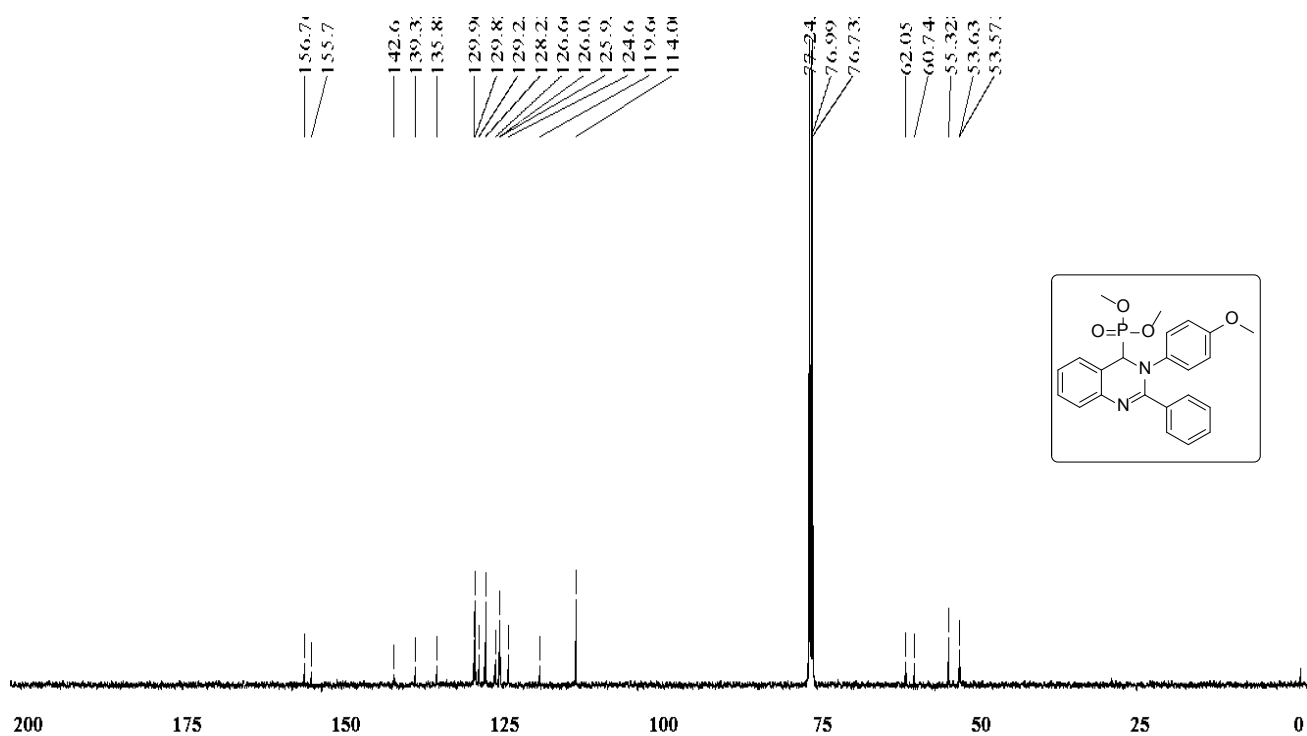



# HIGH RESOLUTION MASS SPECTRA: (Table 1, 7g)

National Centre for Mass Spectrometry

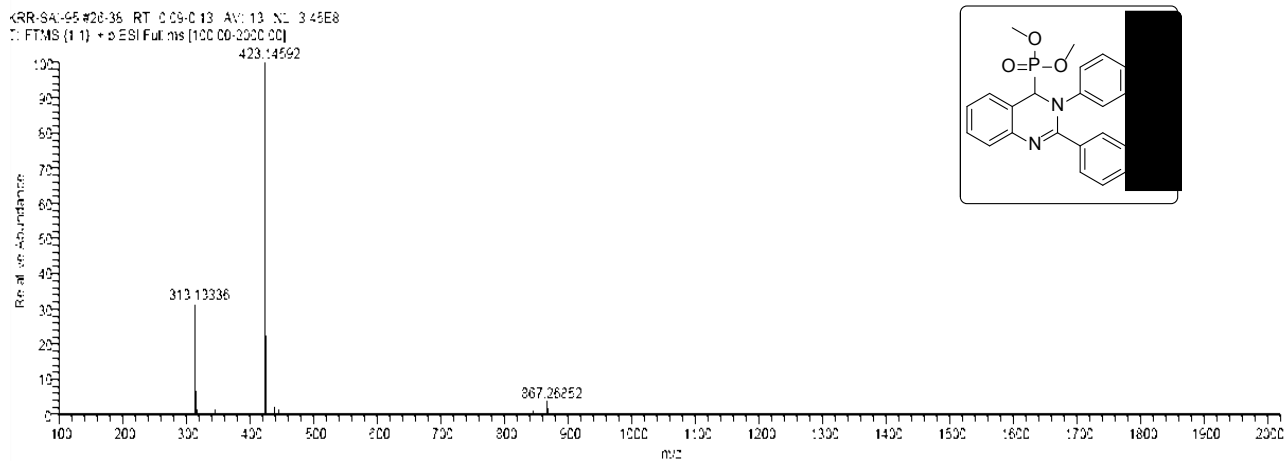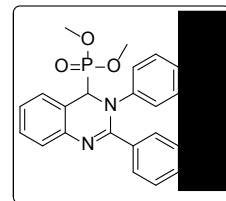

KRR-SAI-95#8-30 RT: 0.03-0.10 AV: 23  
 T: FTMS (1,1) + p ESI Full ms [100.00-2000.00]  
 m/z = 343.91-596.38

| m/z       | Intensity   | Relative | Theo. Mass | Delta (ppm) | RDB equiv. | Composition                                                     |
|-----------|-------------|----------|------------|-------------|------------|-----------------------------------------------------------------|
| 423.14615 | 252058624.0 | 100.00   | 423.14682  | -1.58       | 13.5       | C <sub>23</sub> H <sub>24</sub> O <sub>4</sub> N <sub>2</sub> P |
| 424.14945 | 60046328.0  | 23.82    |            |             |            |                                                                 |

## <sup>31</sup>P NMR (500 MHz, CDCl<sub>3</sub>): (Table 1, 7g)

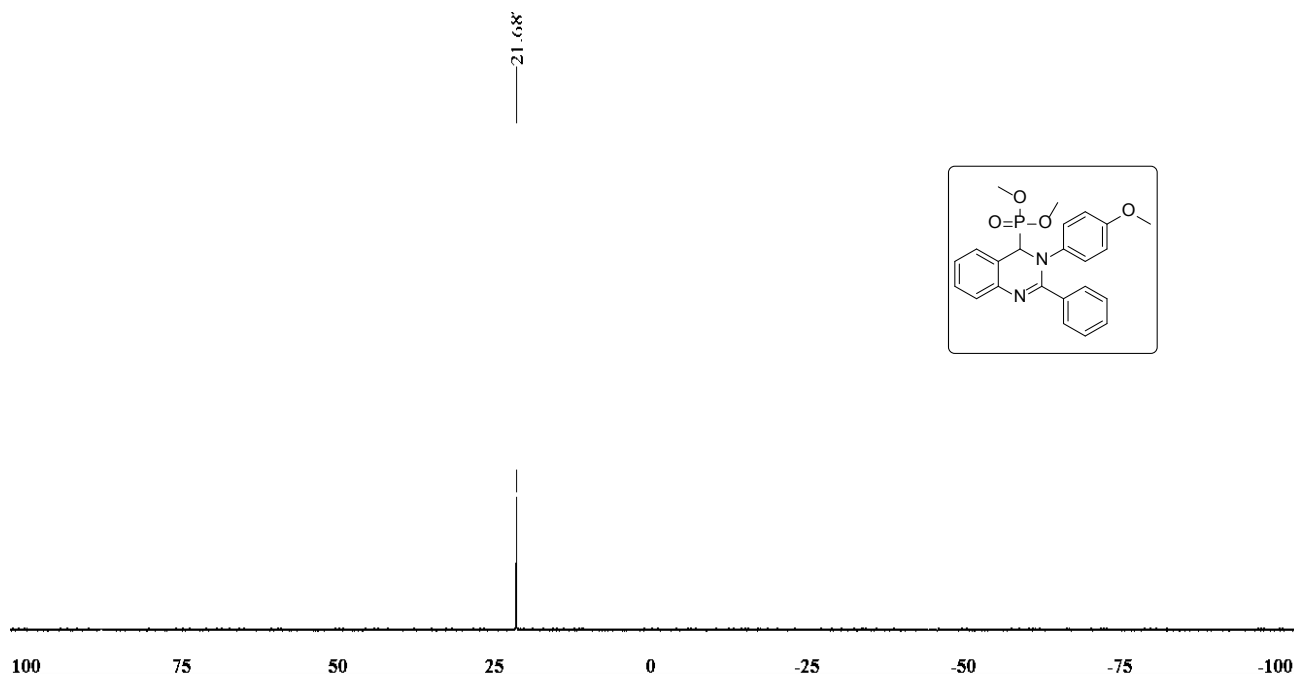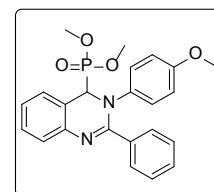

<sup>1</sup>H NMR (500 MHz, CDCl<sub>3</sub>): (Table 3, 7h)

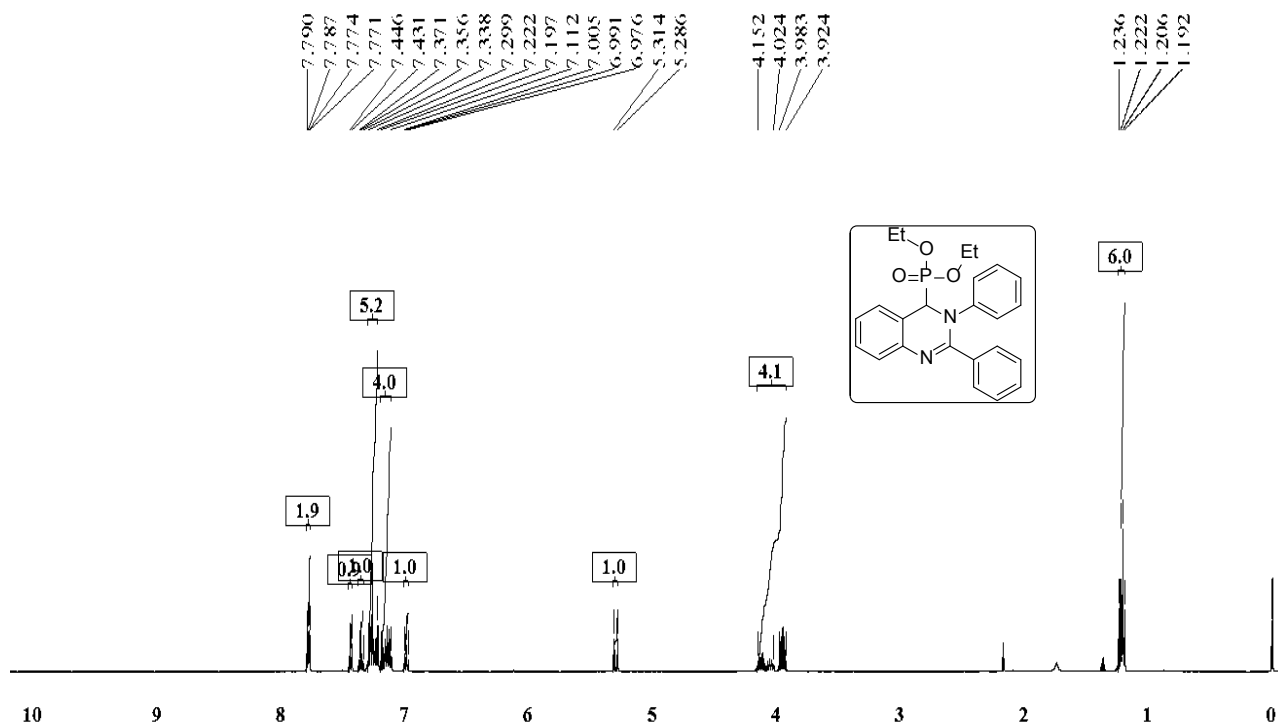

<sup>13</sup>C NMR (75 MHz, CDCl<sub>3</sub>): (Table 3, 7h)

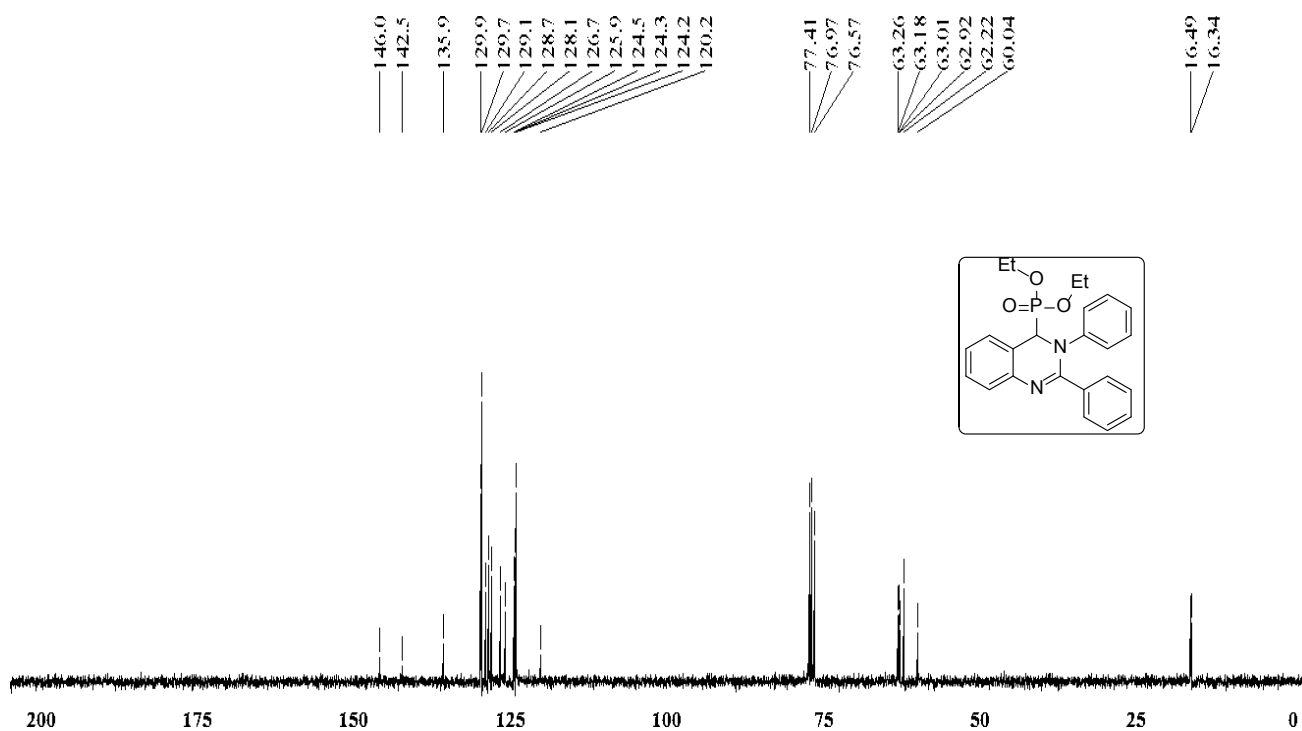

# HIGH RESOLUTION MASS SPECTRA: (Table 3, 7h)

National Centre for Mass Spectrometry  
CSIR-Indian Institute of Chemical Technology

File Name C:\ICT-HRMS\31\_12\_2013\KRR-SAI-81

Sample Name

Sample ID G-SAIDULU

Date and Time 01-01-14 02:33:14

KRR-SAI-81#8-30 RT: 0.03-0.11 AV: 23

F: FTMS {1,1} + p ESI Full ms [100.00-2000.00]

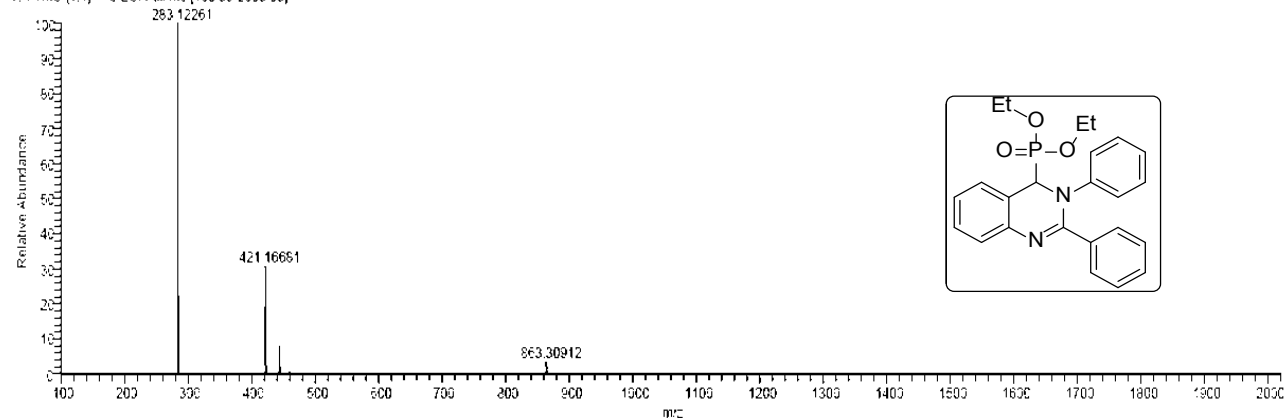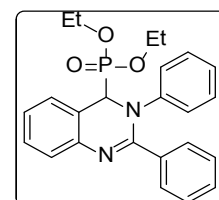

KRR-SAI-81#8-30 RT: 0.03-0.11 AV: 23

F: FTMS {1,1} + p ESI Full ms [100.00-2000.00]

m/z = 399.45-448.68

| m/z       | Intensity   | Relative | Theo. Mass | Delta (ppm) | RDB equiv. | Composition                                                       |
|-----------|-------------|----------|------------|-------------|------------|-------------------------------------------------------------------|
| 421.16671 | 133806960.0 | 100.00   | 421.16756  | -2.01       | 13.5       | C <sub>24</sub> H <sub>26</sub> O <sub>3</sub> N <sub>2</sub> P   |
| 443.14885 | 54426320.0  | 40.68    | 443.14950  | -1.48       | 13.5       | C <sub>24</sub> H <sub>25</sub> O <sub>3</sub> N <sub>2</sub> NaP |

## <sup>31</sup>P NMR (202 MHz, CDCl<sub>3</sub>): (Table 3, 7h)

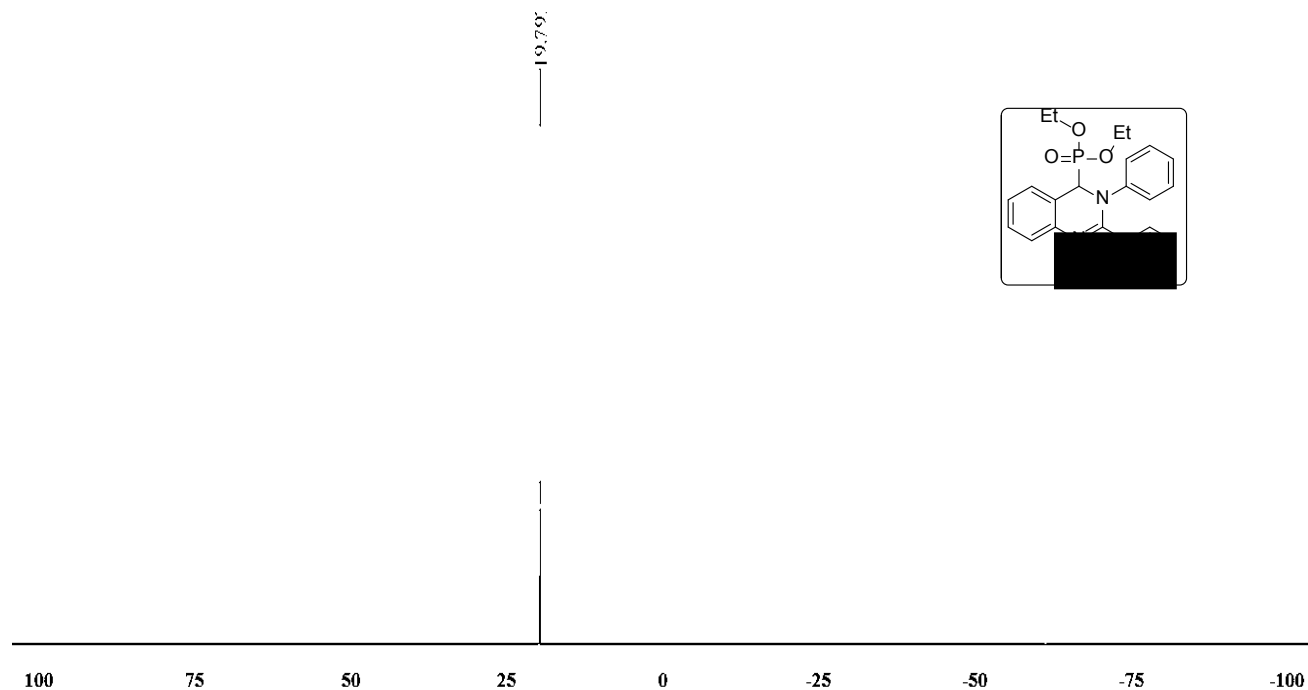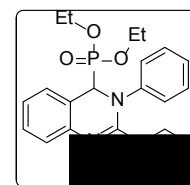

**<sup>1</sup>H NMR (500 MHz, CDCl<sub>3</sub>): (Table 3, 7i)**

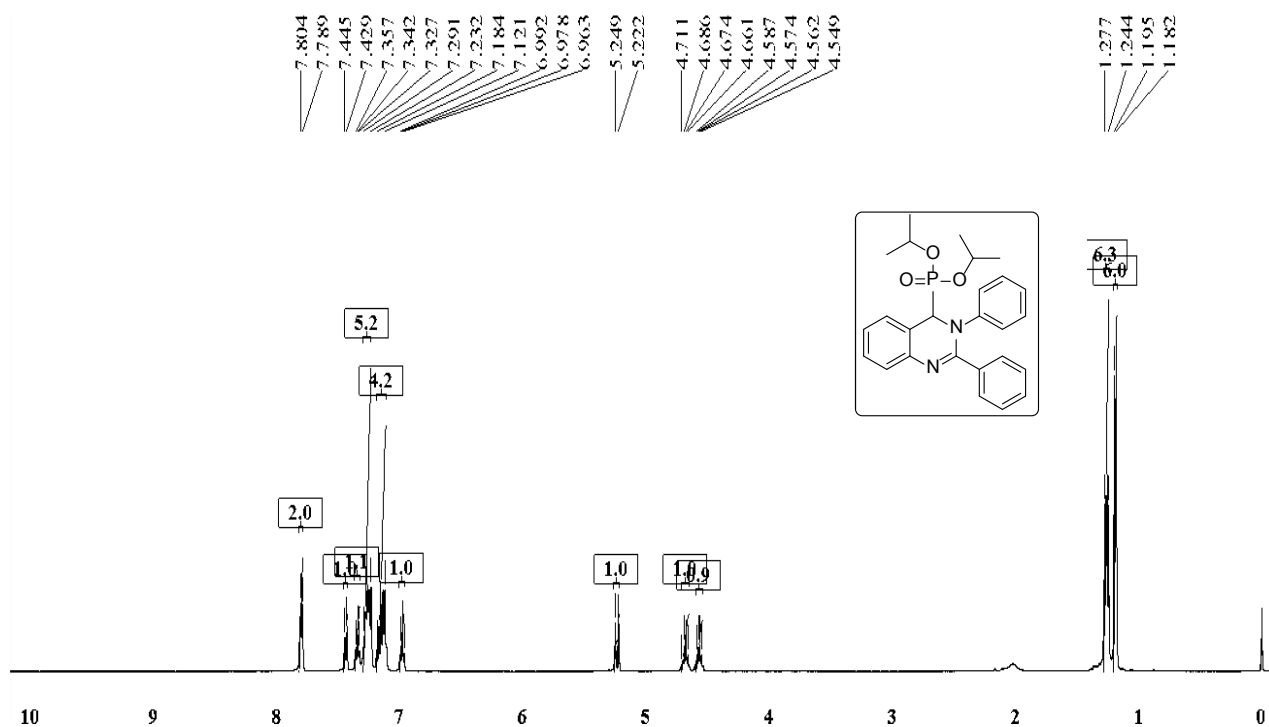

**<sup>13</sup>C NMR (125 MHz, CDCl<sub>3</sub>): (Table 3, 7i)**

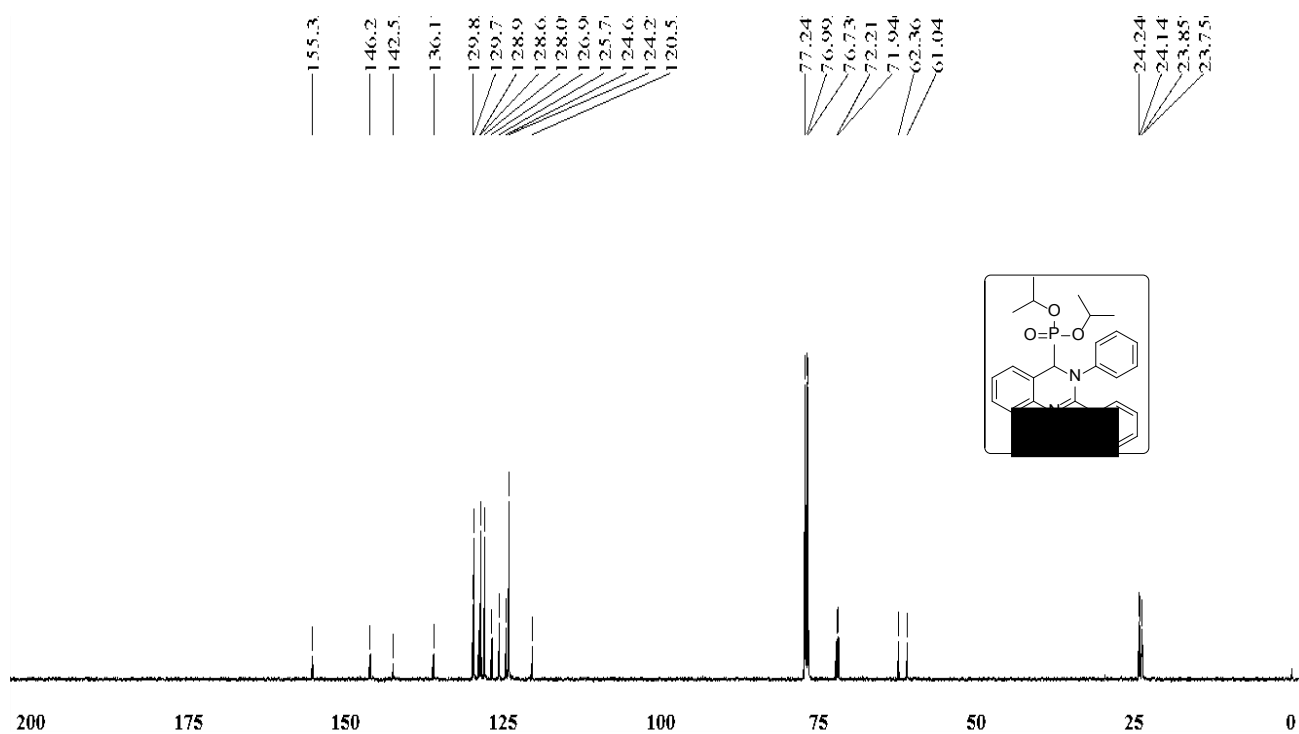

# HIGH RESOLUTION MASS SPECTRA: (Table 3, 7i)

National Centre for Mass Spectrometry  
CSIR-Indian Institute of Chemical Technology

File Name C:\ICT-HRMS\31.12.2013 KRR-SAI-82

Sample Name

Sample ID G-SAIDULU

Date and Time 01-01-14 02:35:47

KRR-SAI-82#8-30 RT: 0.03-0.11 AV: 97 NL: 261E8

T: FTMS (1,1) + p ESI Full ms (100.00-2000.00)

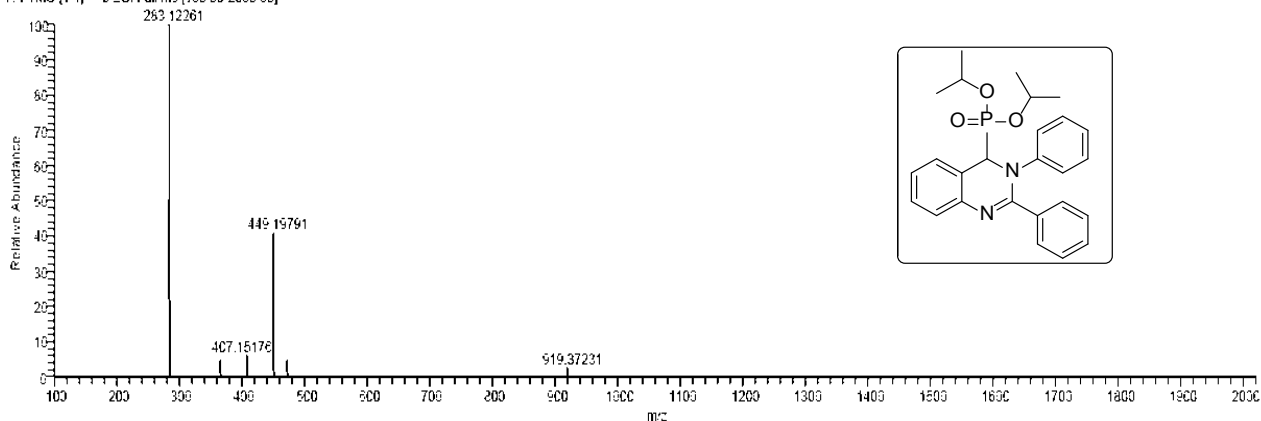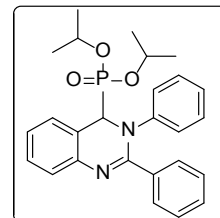

KRR-SAI-82#8-30 RT: 0.03-0.11 AV: 23

T: FTMS (1,1) + p ESI Full ms (100.00-2000.00)

m/z = 417.12-484.03

| m/z       | Intensity   | Relative | Theo. Mass | Delta (ppm) | RDB equiv. | Composition                                                     |
|-----------|-------------|----------|------------|-------------|------------|-----------------------------------------------------------------|
| 449.19767 | 170649056.0 | 100.00   | 449.19886  | -2.64       | 13.5       | C <sub>26</sub> H <sub>30</sub> O <sub>3</sub> N <sub>2</sub> P |
| 450.20179 | 45042236.0  | 26.39    |            |             |            |                                                                 |

## <sup>31</sup>P NMR (202 MHz, CDCl<sub>3</sub>): (Table 3, 7i)

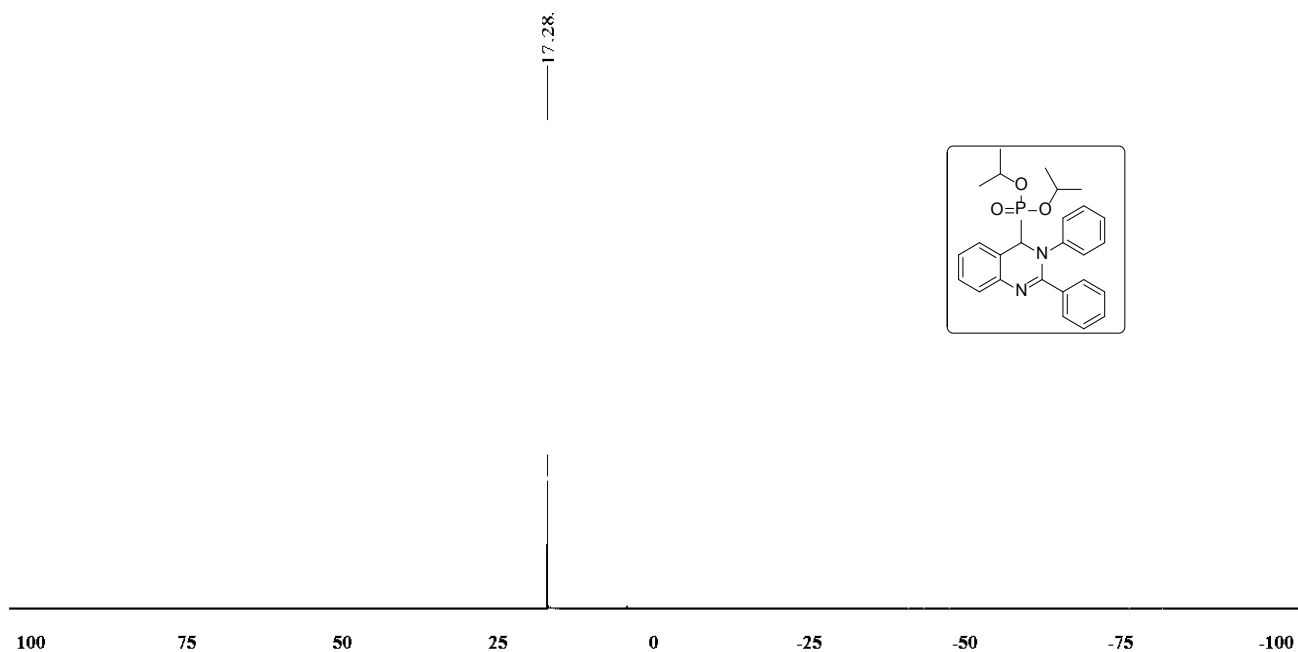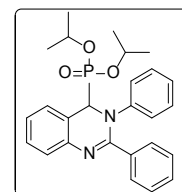

<sup>1</sup>H NMR (500 MHz, CDCl<sub>3</sub>): (Table 3, 7j)

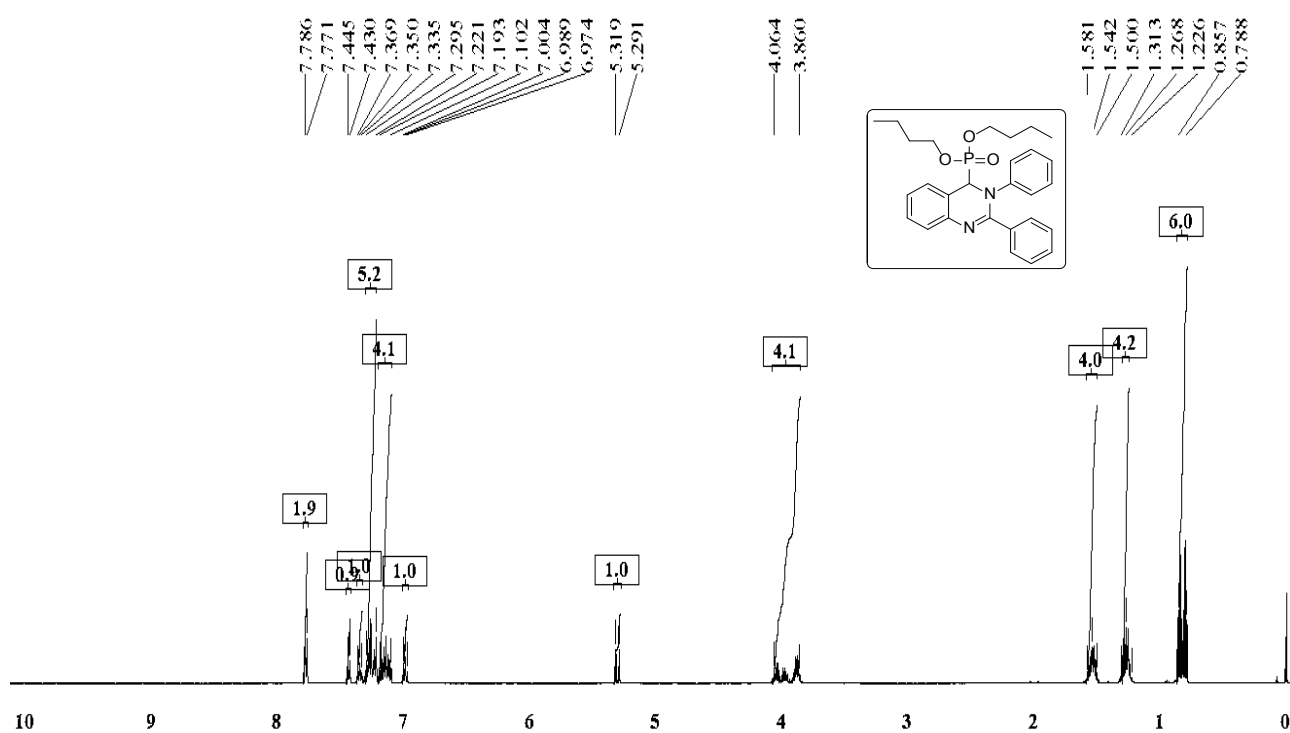

<sup>13</sup>C NMR (125 MHz, CDCl<sub>3</sub>): (Table 3, 7j)

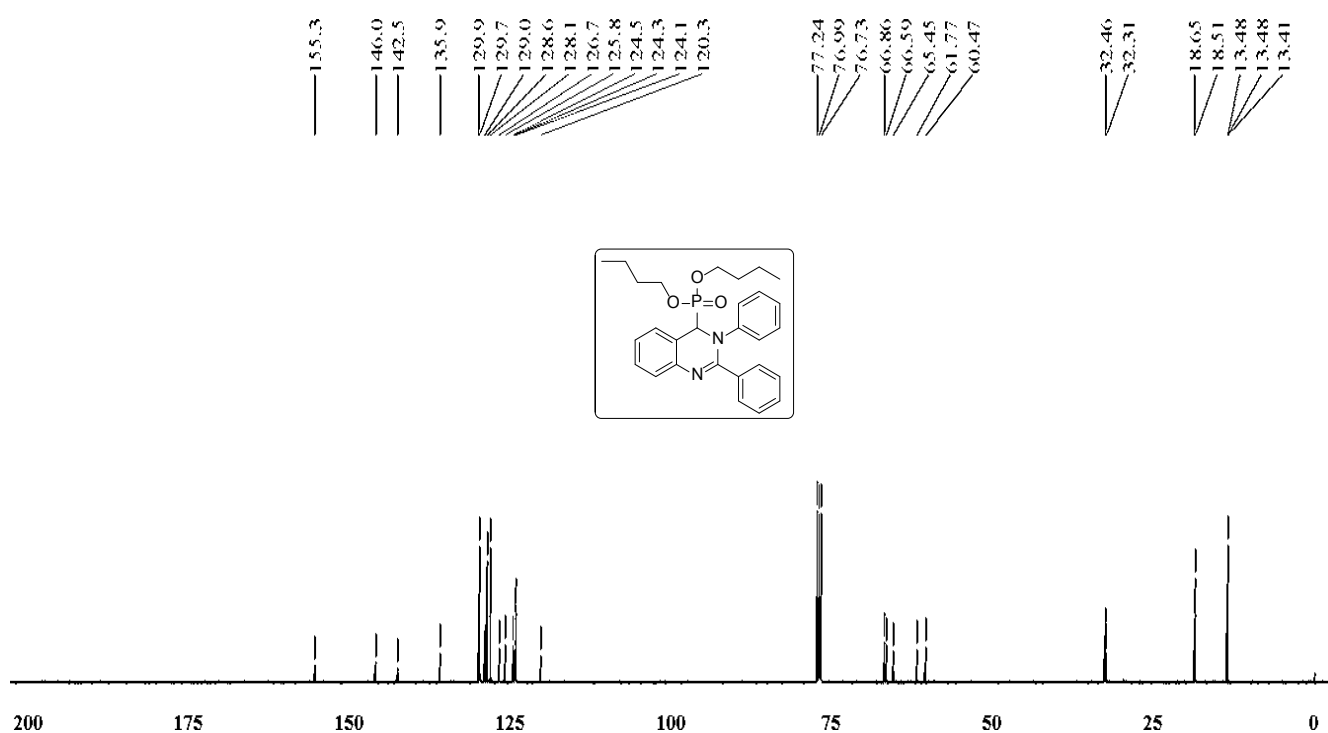

## HIGH RESOLUTION MASS SPECTRA: (Table 3, 7j)

National Centre for Mass Spectrometry  
CSIR-Indian Institute of Chemical Technology

File Name C:\ICT-HRMS\31.12.2013\KRR-SAI-83

Sample Name

Sample ID G-SAIDULU

Date and Time 01-01-14 02:38:22

KRR-SAI-83#8-30 RT: 0.03-0.10 AV: 23

T: FTMS (1,1) + p ESI Full ms [100.00-2000.00]

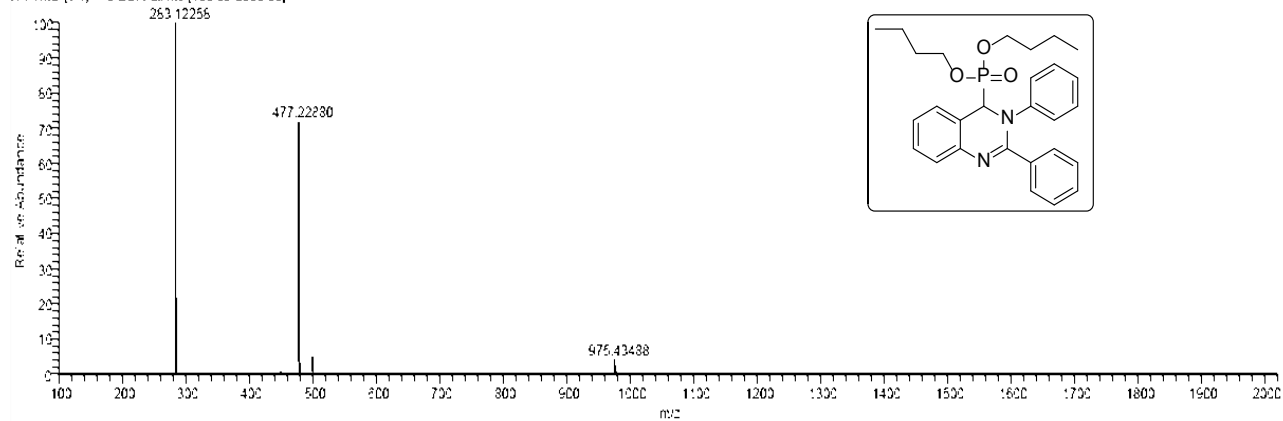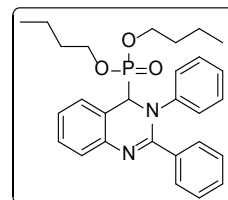

KRR-SAI-83#8-30 RT: 0.03-0.10 AV: 23

T: FTMS (1,1) + p ESI Full ms [100.00-2000.00]

m/z= 443.63-500.96

| m/z       | Intensity   | Relative | Theo. Mass | Delta (ppm) | RDB equiv. | Composition                                                       |
|-----------|-------------|----------|------------|-------------|------------|-------------------------------------------------------------------|
| 477.22861 | 187288384.0 | 100.00   | 477.22775  | 1.79        | 10.5       | C <sub>26</sub> H <sub>35</sub> O <sub>3</sub> N <sub>2</sub> NaP |
|           |             |          | 477.23016  | -3.25       | 13.5       | C <sub>28</sub> H <sub>34</sub> O <sub>3</sub> N <sub>2</sub> P   |

## <sup>31</sup>P NMR (202 MHz, CDCl<sub>3</sub>): (Table 3, 7j)

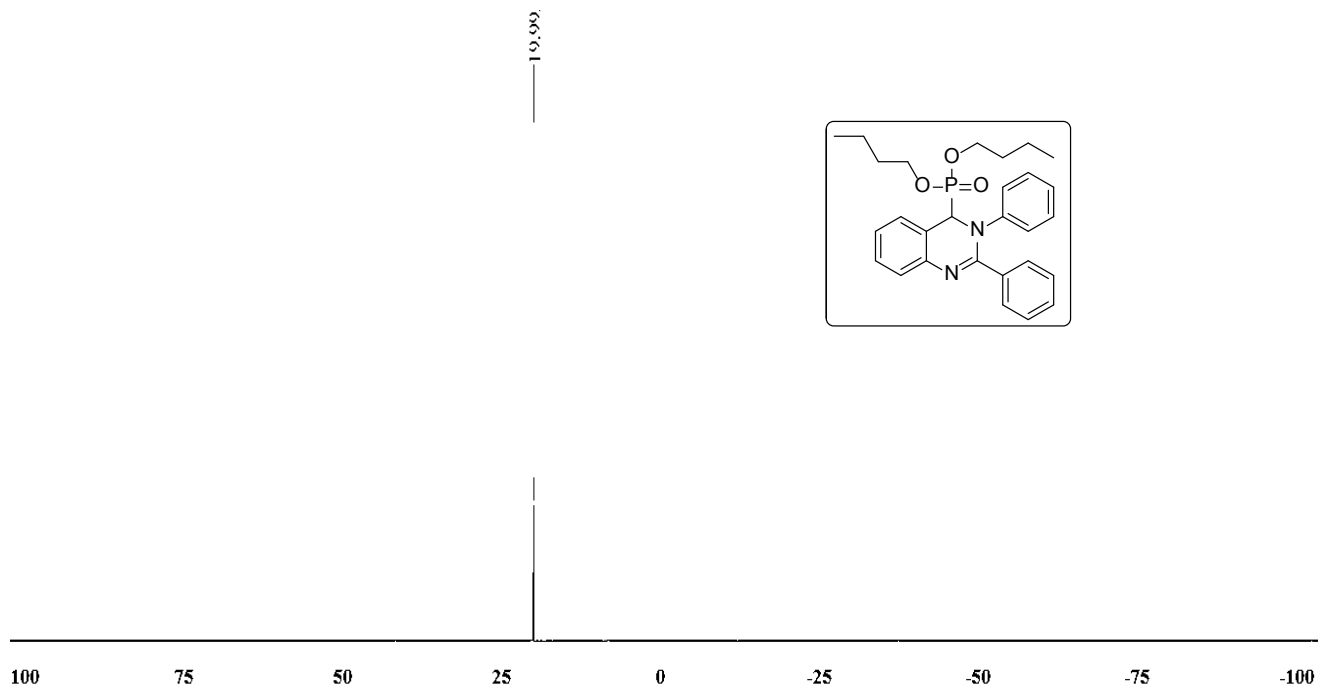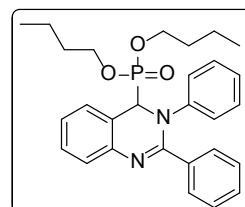

<sup>1</sup>H NMR (300 MHz, CDCl<sub>3</sub>): (Table 3, 7k)

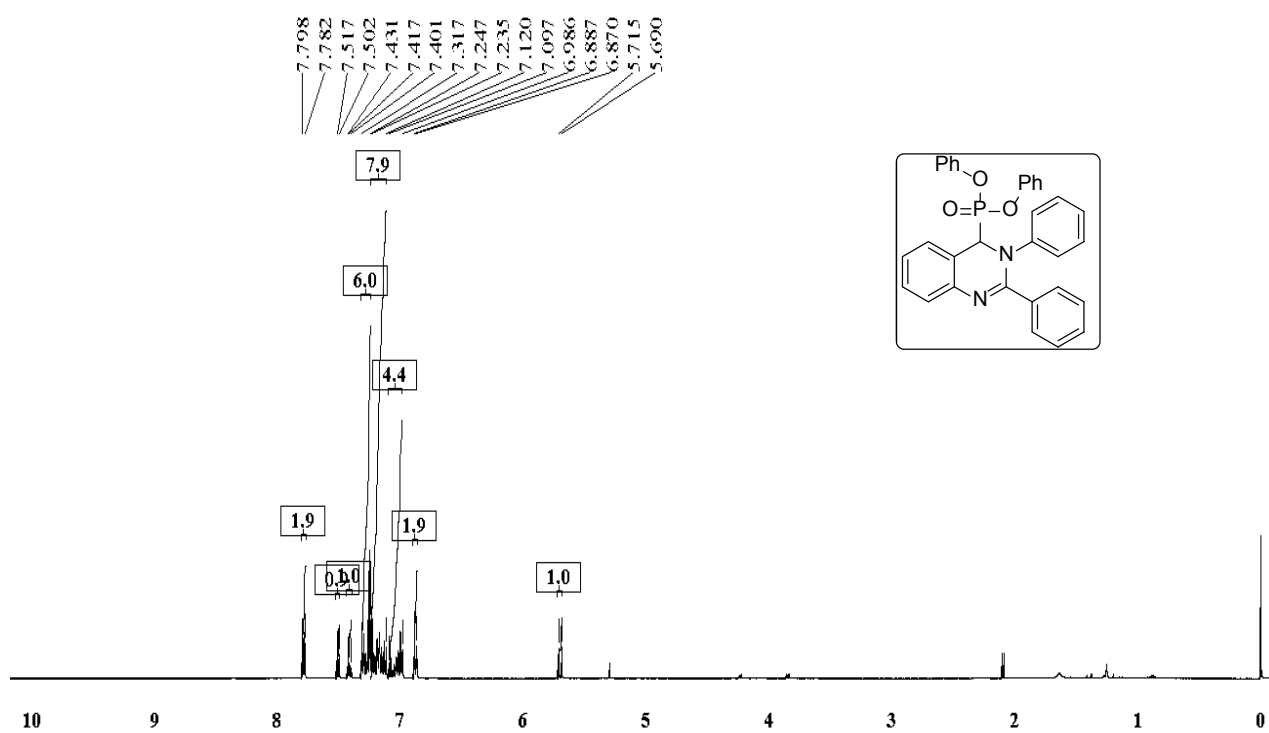

<sup>13</sup>C NMR (125 MHz, CDCl<sub>3</sub>): (Table 3, 7k)

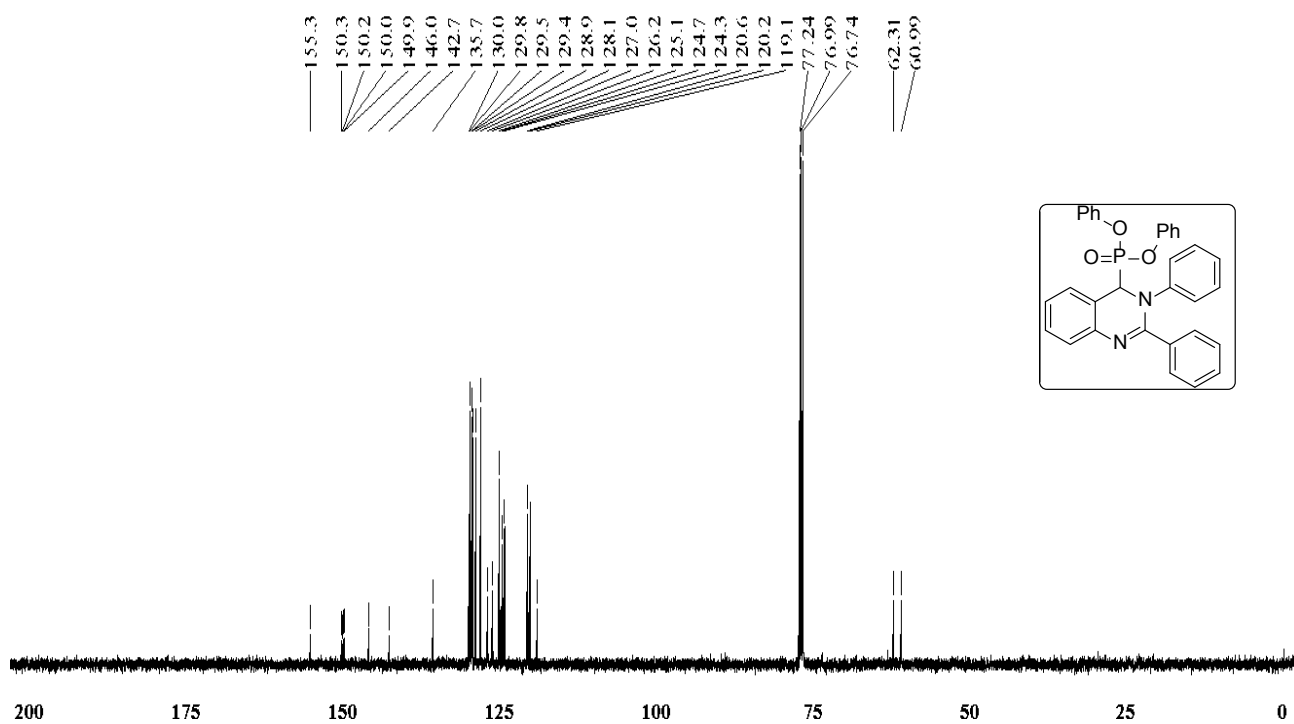



# HIGH RESOLUTION MASS SPECTRA: (Table 3, 7k)

National Centre for Mass Spectrometry  
CSIR-Indian Institute of Chemical Technology

File Name C:\IICT-HRMS\31\_12\_2013\KRR-SAI-84

Sample Name

Sample ID G-SAIDULU

Date and Time 01-01-14 02:40:57

KRR-SAI-84#8-30 RT: 0.03-0.10 AV: 97 NL: 163E8

T: FTMS {1,1} + p ESI Full ms [100.00-2000.00]

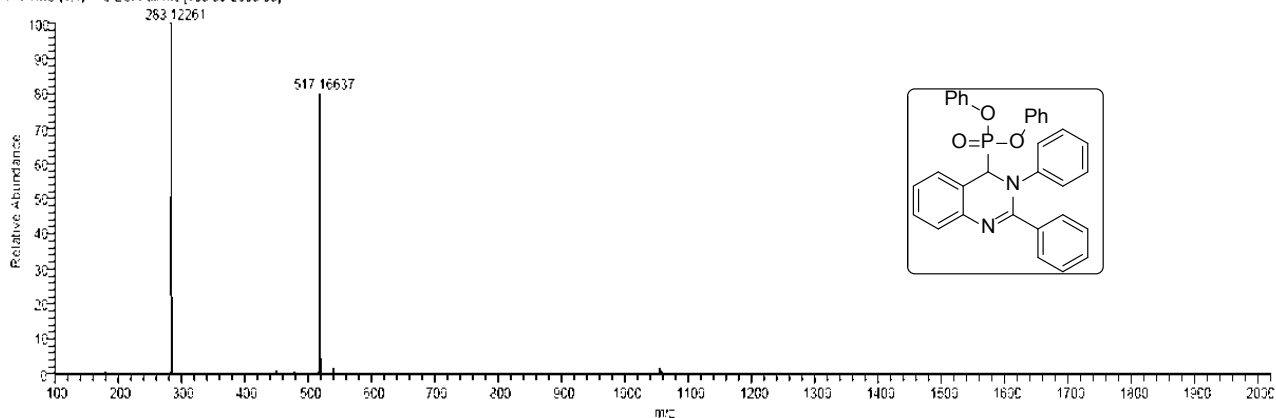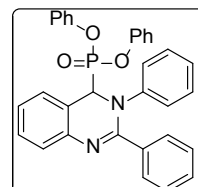

KRR-SAI-84#8-30 RT: 0.03-0.10 AV: 23

T: FTMS {1,1} + p ESI Full ms [100.00-2000.00]

| m/z       | Intensity   | Relative | Theo. Mass | Delta (ppm) | RDB equiv. | Composition                                                     |
|-----------|-------------|----------|------------|-------------|------------|-----------------------------------------------------------------|
| 283.12258 | 173280048.0 | 100.00   |            |             |            |                                                                 |
| 517.16636 | 159955920.0 | 92.31    | 517.16756  | -2.30       | 21.5       | C <sub>32</sub> H <sub>26</sub> O <sub>3</sub> N <sub>2</sub> P |

## <sup>31</sup>P NMR (202 MHz, CDCl<sub>3</sub>): (Table 3, 7k)

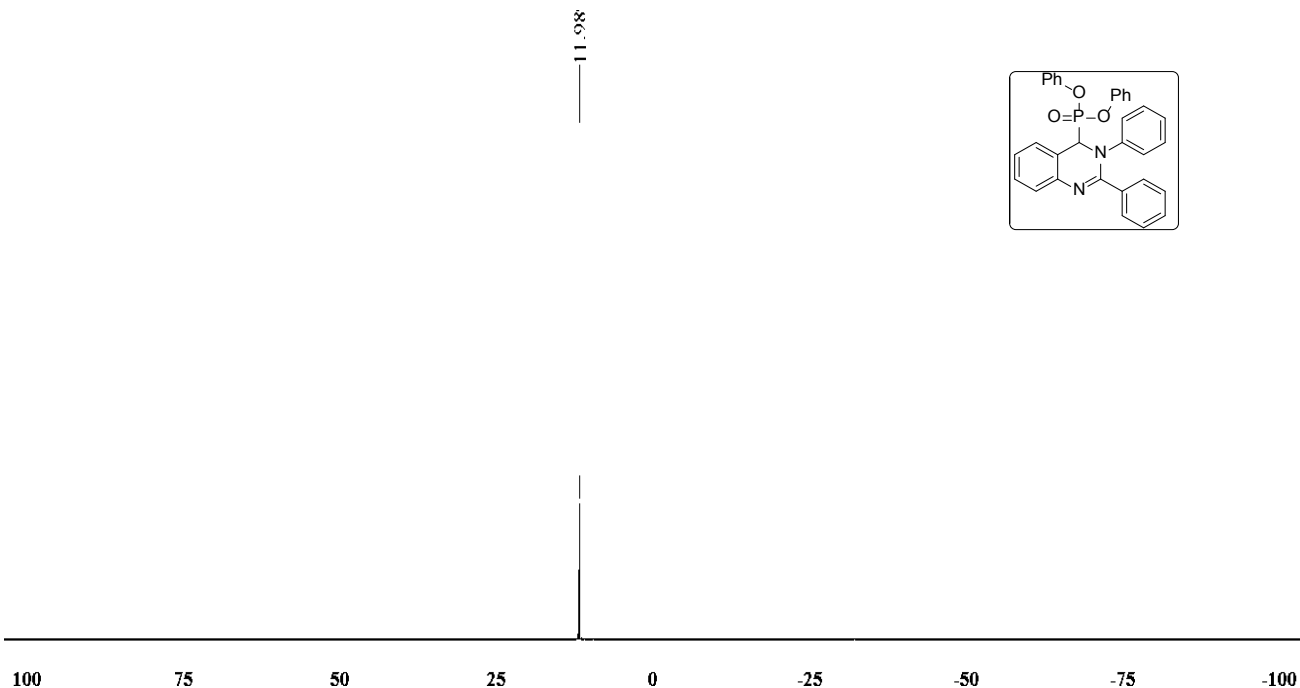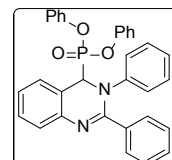

## X-ray Studies:

X-ray data for compounds **5i**, **5p** and **7e** were collected at room temperature using a Bruker Smart Apex CCD diffractometer with graphite monochromated MoK $\alpha$  radiation ( $\lambda=0.71073$  Å) with  $\omega$ -scan method.<sup>1</sup> Preliminary lattice parameters and orientation matrices were obtained from four sets of frames.

Integration and scaling of intensity data were accomplished using SAINT program.<sup>1</sup> The structures were solved by Direct Methods using SHELXS97<sup>2</sup> and refinement was carried out by full-matrix least-squares technique using SHELXL97.<sup>2</sup> Anisotropic displacement parameters were included for all non-hydrogen atoms. The hydrogen atom attached to nitrogen atom of compounds was located in a difference density map and refined isotropically. All other H atoms were located in a difference density map but were positioned geometrically and included as riding atoms, with C-H = 0.93-0.98 Å and  $U_{\text{iso}}(\text{H}) = 1.2U_{\text{eq}}(\text{C})$ .

### Crystal data for compound **5i** (CCDC 996992):

Compound **5i** was crystallized by slow evaporation method chloroform as a solvent. MF = C<sub>28</sub>H<sub>23</sub>N<sub>3</sub>O,  $M = 417.49$ , colorless block, 0.18 x 0.15 x 0.04 mm<sup>3</sup>, triclinic, space group  $P-1$  (No. 2),  $a = 10.6039(8)$ ,  $b = 10.7930(8)$ ,  $c = 11.0137(8)$  Å,  $\alpha = 100.245(1)$ ,  $\beta = 111.738(1)$ ,  $\gamma = 101.524(1)^\circ$ ,  $V = 1102.46(14)$  Å<sup>3</sup>,  $Z = 2$ ,  $D_c = 1.258$  g/cm<sup>3</sup>,  $F_{000} = 440$ , Bruker SMART APEX CCD area-detector, MoK $\alpha$  radiation,  $\lambda = 0.71073$  Å,  $T = 294(2)$ K,  $2\theta_{\text{max}} = 50.0^\circ$ , 10635 reflections collected, 3869 unique ( $R_{\text{int}} = 0.0167$ ). Final  $Goof = 1.026$ ,  $R1 = 0.0373$ ,  $wR2 = 0.1001$ ,  $R$  indices based on 3334 reflections with  $I > 2\sigma(I)$  (refinement on  $F^2$ ), 294 parameters, 0 restraints,  $\mu = 0.078$  mm<sup>-1</sup>. CCDC 996992 contains supplementary Crystallographic data for the structure.

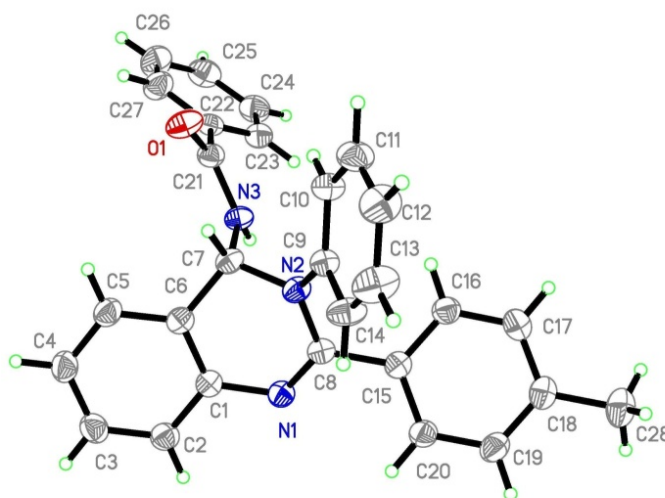

**Fig.1.** A view of compound **5i**, showing the atom-labelling scheme. Displacement ellipsoids are drawn at the 30% probability level and H atoms are represented by circles of arbitrary radii.

**Crystal data for compound 5p (CCDC 996993):**

Compound **5p** was crystallized by slow evaporation method using chloroform as a solvent. MF = C<sub>23</sub>H<sub>21</sub>N<sub>3</sub>O, *M* = 355.43, colorless needle, 0.18 x 0.09 x 0.07 mm<sup>3</sup>, monoclinic, space group *P*2<sub>1</sub>/*c* (No. 14), *a* = 9.3171(12), *b* = 15.390(2), *c* = 13.1098(17) Å,  $\beta$  = 92.604(2)°, *V* = 1877.9(4) Å<sup>3</sup>, *Z* = 4, *D<sub>c</sub>* = 1.257 g/cm<sup>3</sup>, *F*<sub>000</sub> = 752, Bruker SMART APEX CCD area-detector, MoKα radiation,  $\lambda$  = 0.71073 Å, *T* = 294(2)K, 2θ<sub>max</sub> = 50.0°, 17388 reflections collected, 3305 unique (*R*<sub>int</sub> = 0.0265). Final *Goof* = 1.080, *R*1 = 0.0361, *wR*2 = 0.0914, *R* indices based on 2647 reflections with *I* > 2σ(*I*) (refinement on *F*<sup>2</sup>), 250 parameters, 0 restraints,  $\mu$  = 0.079 mm<sup>-1</sup>. CCDC 996993 contains supplementary Crystallographic data for the structure.

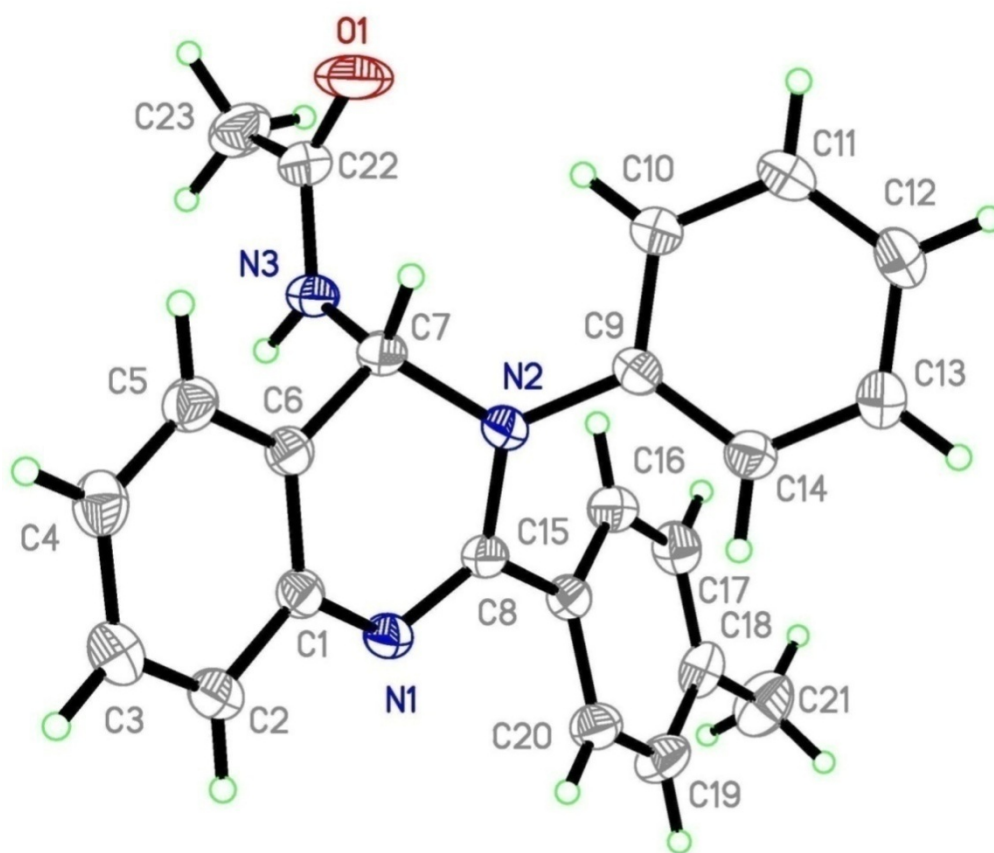

**Fig. 2.** A view of compound **5p**, showing the atom-labelling scheme. Displacement ellipsoids are drawn at the 30% probability level and H atoms are represented by circles of arbitrary radii.

### Crystal data for compound 7e (CCDC 996994):

Compound **5i** was crystallized by slow evaporation method using ethylacetate as solvent. MF: C<sub>26</sub>H<sub>29</sub>N<sub>2</sub>O<sub>3</sub>P, *M* = 448.48, colorless plate, 0.16 x 0.14 x 0.07 mm<sup>3</sup>, monoclinic, space group *P*2<sub>1</sub>/*c* (No. 14), *a* = 14.6985(13), *b* = 11.7586(10), *c* = 13.8686(12) Å,  $\beta$  = 103.257(1)°, *V* = 2333.1(4) Å<sup>3</sup>, *Z* = 4, *D*<sub>c</sub> = 1.277 g/cm<sup>3</sup>, *F*<sub>000</sub> = 952, Bruker SMART APEX CCD area-detector, MoK $\alpha$  radiation,  $\lambda$  = 0.71073 Å, *T* = 294(2)K, 2 $\theta$ <sub>max</sub> = 50.0°, 22035 reflections collected, 4110 unique (*R*<sub>int</sub> = 0.0214). Final *GooF* = 1.038, *R*1 = 0.0365, *wR*2 = 0.0995, *R* indices based on 3707 reflections with *I* > 2 $\sigma$ (*I*) (refinement on *F*<sup>2</sup>), 294 parameters, 0 restraints,  $\mu$  = 0.148 mm<sup>-1</sup>. CCDC 996994 contains supplementary Crystallographic data for the structure. These data can be obtained free of charge at [www.ccdc.cam.ac.uk/conts/retrieving.html](http://www.ccdc.cam.ac.uk/conts/retrieving.html) [or from the Cambridge Crystallographic Data Centre (CCDC), 12 Union Road, Cambridge CB2 1EZ, UK; fax: +44(0) 1223 336 033; email: [deposit@ccdc.cam.ac.uk](mailto:deposit@ccdc.cam.ac.uk)].

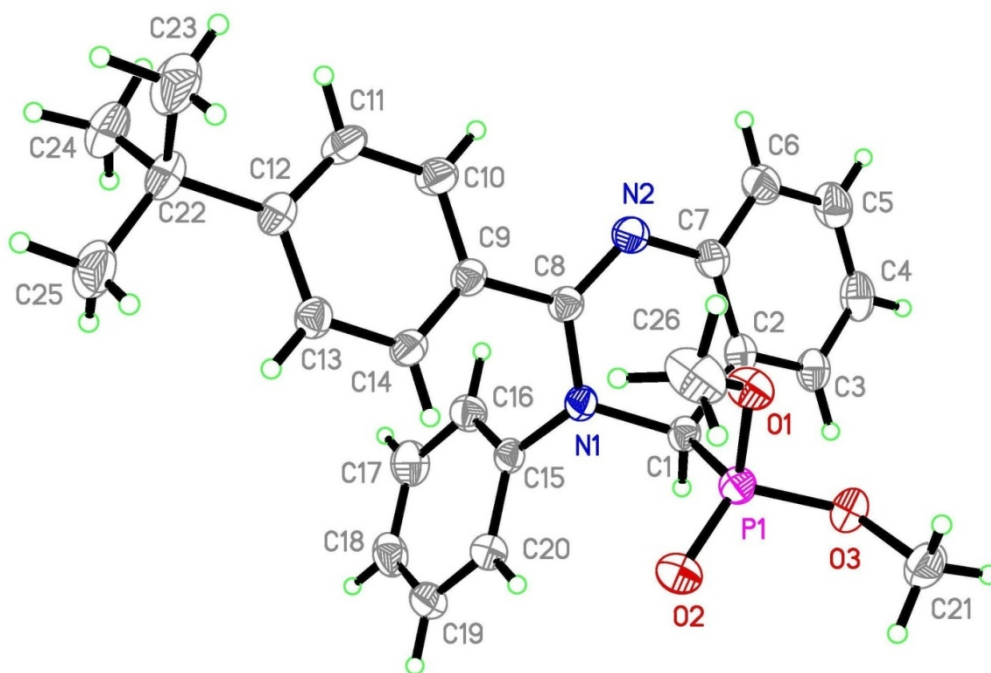

**Fig.3.** A view of compound **7e**, showing the atom-labelling scheme. Displacement ellipsoids are drawn at the 30% probability level and H atoms are represented by circles of arbitrary radii.

## Experiment the formation of iminium ion:

A reaction was performed with 3,4-diaryl-dihydroquinazolin-4-ol (**3a**) in DCE solvent at 75 °C in the absence of nucleophile and the reaction mixture is subjected to GC-MS analysis after 12 hrs. The recorded GC-MS spectra clearly shows the formation of iminium ion species.

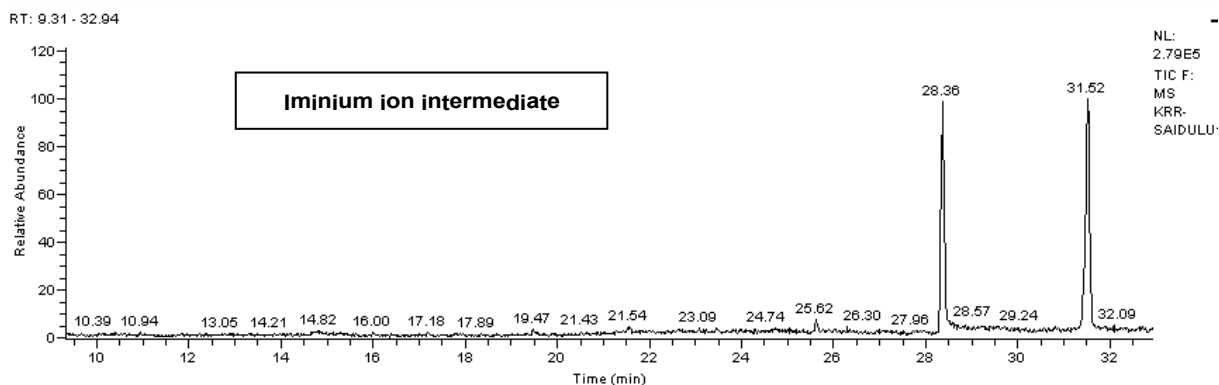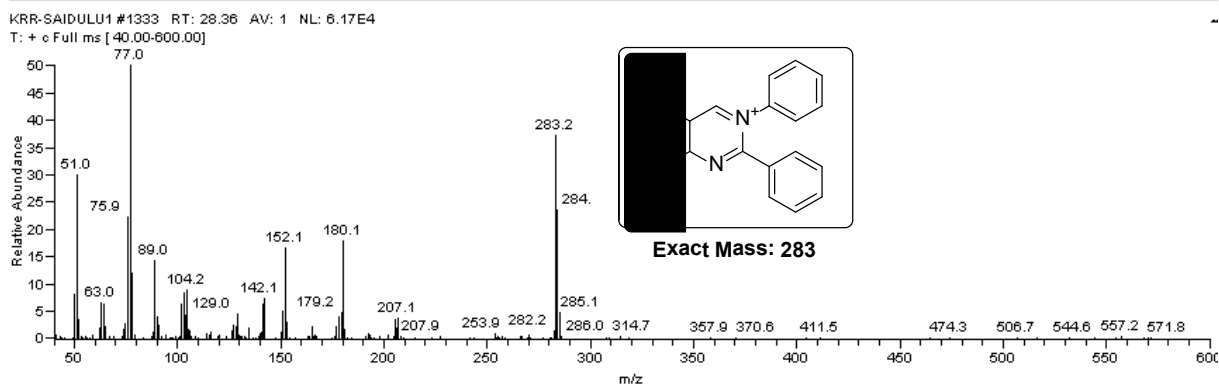

## References:

1. SMART & SAINT. Software Reference manuals. Versions 6.28a & 5.625, Bruker Analytical X-ray Systems Inc., Madison, Wisconsin, U.S.A., 2001.
2. G. M. Sheldrick, *Acta Cryst.* 2008, **A64**, 112-122.
3. F. Ishikawa, Y. Watanabe and J. Saegusa, *Chemical & Pharmaceutical Bulletin*; 1980, **28**, 1357.
